# Supplementary material for: Mitochondrial Genome Variation in Polish Elite Athletes
Source: Int J Mol Sci. 2023 Aug 20;24(16):12992. doi: 10.3390/ijms241612992 (PMC10454803; doi:10.3390/ijms241612992)
Supplement: Supplementary file 1 [file ijms-24-12992-s001.zip › Supplementary Materials S3.xlsx]

## Sheet: Mann-Whitney statistics
Test U Manna-Whitneya (imdik-mito3.sta)												Test U Manna-Whitneya (imdik-mito3.sta)												Test U Manna-Whitneya (imdik-mito3.sta)												Test U Manna-Whitneya (imdik-mito3.sta)
Względem GROUP												Względem SPORTTYP												Względem SPORTTYP												Względem SPORTTYP												Controls
Grupa 1: 0-Control Grupa 2: 1-Sportsmen												Grupa 1: 0-Control Grupa 2: 1-P												Grupa 1: 0-Control Grupa 2: 2-E												Grupa 1: 1-P Grupa 2: 2-E												Statystyki opisowe (imdik-mito3.sta)
	Suma ran	Suma ran				Z		N ważn.	N ważn.				Suma ran	Suma ran				Z		N ważn.	N ważn.	2*1str.			Suma ran	Suma ran				Z		N ważn.	N ważn.	2*1str.			Suma ran	Suma ran				Z		N ważn.	N ważn.	2*1str.
	Control	Sport	U	Z	poziom p	popraw.	poziom p	Control	Sport				Control	S	U	Z	poziom p	popraw.	poziom p	Control	S	dokł. p			Control	W	U	Z	poziom p	popraw.	poziom p	Control	W	dokł. p			S	W	U	Z	poziom p	popraw.	poziom p	S	W	dokł. p			Nważnych
AGE	9896.5	10003.5	4846.5	-0.254799	0.79888	-0.256509	0.797559	100	99			AGE	7557	4071	2507	-0.361182	0.717966	-0.364901	0.715188	100	52			AGE	7389.5	3488.5	2339.5	-0.0436114	0.965214	-0.0441118	0.964816	100	47	0.965342		AGE	2557	2393	1179	-0.301306	0.763183	-0.302498	0.762275	52	47	0.766866		AGE	100
HET_VAR	10450	8856	3906	2.25538	0.0241162	2.65509	0.00793276	97	99			HET_VAR	7671.5	3503.5	2125.5	1.57907	0.11433	1.81354	0.0697582	97	52			HET_VAR	7531.5	2908.5	1780.5	2.12604	0.0335072	2.46567	0.0136809	97	47	0.0331616		HET_VAR	2674.5	2275.5	1147.5	0.522031	0.601652	0.664633	0.50629	52	47	0.603167		HET_VAR	97
RARE_VAR	10092.5	9213.5	4263.5	1.35499	0.17543	1.37165	0.170182	97	99			RARE_VAR	7550	3625	2247	1.09519	0.273441	1.10973	0.267126	97	52			RARE_VAR	7295.5	3144.5	2016.5	1.12054	0.262492	1.13254	0.257414	97	47	0.26352		RARE_VAR	2643.5	2306.5	1178.5	0.30481	0.760513	0.309704	0.756788	52	47	0.761543		RARE_VAR	97
NS_VAR	10127	9179	4229	1.44188	0.149346	1.45757	0.144969	97	99			NS_VAR	7529	3646	2268	1.01156	0.311757	1.02301	0.306313	97	52			NS_VAR	7351	3089	1961	1.357	0.174789	1.37211	0.170038	97	47	0.176086		NS_VAR	2698	2252	1124	0.686698	0.492278	0.695503	0.486745	52	47	0.496161		NS_VAR	97
S_VAR	9840.5	9465.5	4515.5	0.720311	0.471339	0.723211	0.469556	97	99			S_VAR	7342	3833	2455	0.266829	0.789603	0.267879	0.788794	97	52			S_VAR	7251.5	3188.5	2060.5	0.933074	0.350789	0.936772	0.348883	97	47	0.352057		S_VAR	2693.5	2256.5	1128.5	0.655166	0.512365	0.658372	0.510304	52	47	0.514023		S_VAR	97
MCOPYNUM	11202	7908	3155	4.05546	5.01535e-05	4.05546	5.01535e-05	98	97			MCOPYNUM	7837	3189	1914	2.17302	0.0297859	2.17302	0.0297859	98	50	0.0295957		MCOPYNUM	8216	2369	1241	4.48618	7.27636e-06	4.48618	7.27636e-06	98	47	4.46278e-06		MCOPYNUM	2741	2012	884	2.10057	0.0356867	2.10057	0.0356867	50	47	0.0355853		MCOPYNUM	98
NS_PROP	9566.5	9739.5	4789.5	0.0302228	0.97589	0.0302646	0.975856	97	99			NS_PROP	7354	3821	2443	0.314619	0.753053	0.31501	0.752756	97	52			NS_PROP	6965.5	3474.5	2212.5	-0.285461	0.775293	-0.285836	0.775006	97	47	0.776081		NS_PROP	2530.5	2419.5	1152.5	-0.486995	0.626265	-0.487982	0.625566	52	47	0.627721		NS_PROP	97
Blood
Test U Manna-Whitneya (imdik-mito2.sta)												Test U Manna-Whitneya (imdik-mito3.sta)												Test U Manna-Whitneya (imdik-mito3.sta)												Test U Manna-Whitneya (imdik-mito3.sta)
Względem GROUP												Względem SPORTTYP												Względem SPORTTYP												Względem SPORTTYP												Controls
Grupa 1: 0-Control Grupa 2: 1-Sportsmen												Grupa 1: 0-Control Grupa 2: 1-P												Grupa 1: 0-Control Grupa 2: 2-E												Grupa 1: 1-P Grupa 2: 2-E												Statystyki opisowe (imdik-mito2.sta)
	Suma ran	Suma ran				Z		N ważn.	N ważn.	2*1str.			Suma ran	Suma ran				Z		N ważn.	N ważn.	2*1str.			Suma ran	Suma ran				Z		N ważn.	N ważn.	2*1str.			Suma ran	Suma ran				Z		N ważn.	N ważn.	2*1str.
	Control	Sport	U	Z	poziom p	popraw.	poziom p	Control	Sport	dokł. p			Control	S	U	Z	poziom p	popraw.	poziom p	Control	S	dokł. p			Control	W	U	Z	poziom p	popraw.	poziom p	Control	W	dokł. p			S	W	U	Z	poziom p	popraw.	poziom p	S	W	dokł. p			Nważnych
MCOPYNUM	5536	3917	1502	3.63341	0.000280136	3.63341	0.000280136	68	69	0.000238549		MCOPYNUM	3449	1111	733	1.52648	0.126901	1.52648	0.126901	68	27	0.128472		MCOPYNUM	4433	1672	769	4.05448	5.03643e-05	4.05448	5.03643e-05	68	42	3.47437e-05		MCOPYNUM	1088	1327	424	1.75821	0.0787211	1.75821	0.0787211	27	42	0.0797129		MCOPYNUM	68
Saliva
Test U Manna-Whitneya (imdik-mito2.sta)												Test U Manna-Whitneya (imdik-mito3.sta)												Test U Manna-Whitneya (imdik-mito3.sta)												Test U Manna-Whitneya (imdik-mito3.sta)
Względem GROUP												Względem SPORTTYP												Względem SPORTTYP												Względem SPORTTYP												Controls
Grupa 1: 0-Control Grupa 2: 1-Sportsmen												Grupa 1: 0-Control Grupa 2: 1-P												Grupa 1: 0-Control Grupa 2: 2-E												Grupa 1: 1-P Grupa 2: 2-E												Statystyki opisowe (imdik-mito2.sta)
	Suma ran	Suma ran				Z		N ważn.	N ważn.	2*1str.			Suma ran	Suma ran				Z		N ważn.	N ważn.	2*1str.			Suma ran	Suma ran				Z		N ważn.	N ważn.	2*1str.			Suma ran	Suma ran				Z		N ważn.	N ważn.	2*1str.
	Control	Sport	U	Z	poziom p	popraw.	poziom p	Control	Sport	dokł. p			Control	S	U	Z	poziom p	popraw.	poziom p	Control	S	dokł. p			Control	W	U	Z	poziom p	popraw.	poziom p	Control	W	dokł. p			S	W	U	Z	poziom p	popraw.	poziom p	S	W	dokł. p			Nważnych
MCOPYNUM	1021	690	284	2.11624	0.0343325	2.11624	0.0343325	30	28	0.0342788		MCOPYNUM	936	495	219	2.2612	0.0237533	2.2612	0.0237533	30	23	0.0234096		MCOPYNUM	550	80	65	0.471405	0.637355	0.471405	0.637355	30	5	0.66381		MCOPYNUM	318	88	42	-0.929768	0.352498	-0.929768	0.352498	23	5	0.379731		MCOPYNUM	30
Controls												Sportsmen												P												E
Test U Manna-Whitneya (imdik-mito2.sta)												Test U Manna-Whitneya (imdik-mito2.sta)												Test U Manna-Whitneya (imdik-mito3.sta)												Test U Manna-Whitneya (imdik-mito3.sta)
Względem DNA_FROM												Względem DNA_FROM												Względem DNA_FROM												Względem DNA_FROM
Grupa 1: 0-blood Grupa 2: 1-saliva												Grupa 1: 0-blood Grupa 2: 1-saliva												Grupa 1: 0-blood Grupa 2: 1-saliva												Grupa 1: 0-blood Grupa 2: 1-saliva
	Suma ran	Suma ran				Z		N ważn.	N ważn.				Suma ran	Suma ran				Z		N ważn.	N ważn.	2*1str.			Suma ran	Suma ran				Z		N ważn.	N ważn.	2*1str.			Suma ran	Suma ran				Z		N ważn.	N ważn.	2*1str.
	blood	saliva	U	Z	poziom p	popraw.	poziom p	blood	saliva				blood	saliva	U	Z	poziom p	popraw.	poziom p	blood	saliva	dokł. p			blood	saliva	U	Z	poziom p	popraw.	poziom p	blood	saliva	dokł. p			blood	saliva	U	Z	poziom p	popraw.	poziom p	blood	saliva	dokł. p
MCOPYNUM	2790	2061	444	-4.43997	9.02706e-06	-4.43997	9.02706e-06	68	30			MCOPYNUM	3012	1741	597	-2.93765	0.00330943	-2.93765	0.00330943	69	28	0.00298841		MCOPYNUM	621	654	243	-1.3139	0.188888	-1.3139	0.188888	27	23	0.193979		MCOPYNUM	935	193	32	-2.51874	0.0117824	-2.51874	0.0117824	42	5	0.00900297
Tabela dwudzielcza: liczności obserwowane (imdik-mito2.sta)					Statystyki: GROUP(2) x DNA_FROM(2) (imdik-mito2.sta)							Tabela dwudzielcza: liczności obserwowane (imdik-mito3.sta)					Statystyki: SPORTTYP(3) x DNA_FROM(2) (imdik-mito3.sta)
	DNA_FROM	DNA_FROM	Wiersz										DNA_FROM	DNA_FROM	Wiersz
	blood	saliva	Razem			Chi-kwadr.	df	p					blood	saliva	Razem			Chi-kwadr.	df	p
Control	70	30	100		Chi^2 Pearsona	0.0119243	df=1	p=.91305				Controls	70	30	100		Chi^2 Pearsona	14.9409	df=2	p=.00057
%wiersza	70.00%	30.00%			Chi^2 NW	0.0119248	df=1	p=.91304				%wiersza	70.00%	30.00%			Chi^2 NW	16.1186	df=2	p=.00032
Sport	70	29	99		Chi^2 Yatesa	0.0021178	df=1	p=.96329				P	28	24	52		R rang Spearman	-0.097891	t=-1.381	p=.16897
%wiersza	70.71%	29.29%			dokł. Fishera, 1-stronny			p=.51838				%wiersza	53.85%	46.15%
Razem	140	59	199		2-stronny			p=1.0000				E	42	5	47
					Chi^2 McNemara (A/D)	16.1616	df=1	p=.00006				%wiersza	89.36%	10.64%
					(B/C)	15.21	df=1	p=.00010				Razem	140	59	199
					R rang Spearman	-0.007741	t=-.1087	p=.91359
Tabela dwudzielcza: liczności obserwowane (imdik-mito2.sta)
	SEX	SEX	Wiersz
	F	M	Razem
Control	0	100	100
%wiersza	0.00%	100.00%
Sport	0	99	99
%wiersza	0.00%	100.00%
Razem	0	199	199
Tabela dwudzielcza: liczności obserwowane (imdik-mito2.sta)																Statystyki: GROUP(2) x HAPLOGRP(13) (imdik-mito2.sta)								Tabela dwudzielcza: liczności obserwowane (imdik-mito3.sta)																Statystyki: SPORTTYP(3) x HAPLOGRP(13) (imdik-mito3.sta)
	HAPLOGRP	HAPLOGRP	HAPLOGRP	HAPLOGRP	HAPLOGRP	HAPLOGRP	HAPLOGRP	HAPLOGRP	HAPLOGRP	HAPLOGRP	HAPLOGRP	HAPLOGRP	HAPLOGRP	Wiersz											HAPLOGRP	HAPLOGRP	HAPLOGRP	HAPLOGRP	HAPLOGRP	HAPLOGRP	HAPLOGRP	HAPLOGRP	HAPLOGRP	HAPLOGRP	HAPLOGRP	HAPLOGRP	HAPLOGRP	Wiersz
	C	H	HV	I	J	K	M	T	U	V	X	W	N	Razem			Chi-kwadr.	df	p						C	H	HV	I	J	K	M	T	U	V	X	W	N	Razem			Chi-kwadr.	df	p
Controls	2	37	2	2	8	6	0	12	16	5	2	4	1	97		Chi^2 Pearsona	11.1735	df=12	p=.51411					Controls	2	37	2	2	8	6	0	12	16	5	2	4	1	97		Chi^2 Pearsona	24.9011	df=24	p=.41117
%wiersza	2.06%	38.14%	2.06%	2.06%	8.25%	6.19%	0.00%	12.37%	16.49%	5.15%	2.06%	4.12%	1.03%			Chi^2 NW	13.5497	df=12	p=.33040					%wiersza	2.06%	38.14%	2.06%	2.06%	8.25%	6.19%	0.00%	12.37%	16.49%	5.15%	2.06%	4.12%	1.03%			Chi^2 NW	29.0374	df=24	p=.21876
Sportsmen	1	41	3	1	8	5	1	7	26	5	1	0	0	99		R rang Spearman	-0.023155	t=-.3226	p=.74734					P	1	22	1	1	5	1	0	2	18	1	0	0	0	52		R rang Spearman	-0.014921	t=-.2078	p=.83557
%wiersza	1.01%	41.41%	3.03%	1.01%	8.08%	5.05%	1.01%	7.07%	26.26%	5.05%	1.01%	0.00%	0.00%											%wiersza	1.92%	42.31%	1.92%	1.92%	9.62%	1.92%	0.00%	3.85%	34.62%	1.92%	0.00%	0.00%	0.00%
Razem	3	78	5	3	16	11	1	19	42	10	3	4	1	196										E	0	19	2	0	3	4	1	5	8	4	1	0	0	47
																								%wiersza	0.00%	40.43%	4.26%	0.00%	6.38%	8.51%	2.13%	10.64%	17.02%	8.51%	2.13%	0.00%	0.00%
																								Razem	3	78	5	3	16	11	1	19	42	10	3	4	1	196
Tabela dwudzielcza: liczności obserwowane (imdik-mito3.sta)																								Tabela dwudzielcza: liczności obserwowane (imdik-mito3.sta)
	HET_VAR	HET_VAR	HET_VAR	HET_VAR	HET_VAR	Wiersz																			HET_VAR	HET_VAR	HET_VAR	HET_VAR	HET_VAR	Wiersz
	G_1:0	G_2:1	G_3:2	G_4:3	G_5:4	Razem																			G_1:0	G_2:1	G_3:2	G_4:3	G_5:4	Razem
Controls	54	28	11	3	1	97																		Controls	54	28	11	3	1	97
%wiersza	55.67%	28.87%	11.34%	3.09%	1.03%																			%wiersza	55.67%	28.87%	11.34%	3.09%	1.03%
Sportsmen	71	24	3	1	0	99																		P	36	13	2	1	0	52
%wiersza	71.72%	24.24%	3.03%	1.01%	0.00%																			%wiersza	69.23%	25.00%	3.85%	1.92%	0.00%
Razem	125	52	14	4	1	196																		E	35	11	1	0	0	47
																								%wiersza	74.47%	23.40%	2.13%	0.00%	0.00%
																								Razem	125	52	14	4	1	196
Tabela dwudzielcza: liczności obserwowane (imdik-mito3.sta)																								Tabela dwudzielcza: liczności obserwowane (imdik-mito3.sta)
	RARE_VAR	RARE_VAR	RARE_VAR	RARE_VAR	RARE_VAR	RARE_VAR	RARE_VAR	RARE_VAR	RARE_VAR	RARE_VAR	RARE_VAR	RARE_VAR	Wiersz												RARE_VAR	RARE_VAR	RARE_VAR	RARE_VAR	RARE_VAR	RARE_VAR	RARE_VAR	RARE_VAR	RARE_VAR	RARE_VAR	RARE_VAR	RARE_VAR	Wiersz
	G_1:0	G_2:1	G_3:2	G_4:3	G_5:4	G_6:5	G_7:6	G_8:7	G_9:8	G_10:9	G_11:10	G_12:15	Razem												G_1:0	G_2:1	G_3:2	G_4:3	G_5:4	G_6:5	G_7:6	G_8:7	G_9:8	G_10:9	G_11:10	G_12:15	Razem
Controls	9	15	16	22	13	10	5	3	1	1	1	1	97											Controls	9	15	16	22	13	10	5	3	1	1	1	1	97
%wiersza	9.28%	15.46%	16.49%	22.68%	13.40%	10.31%	5.15%	3.09%	1.03%	1.03%	1.03%	1.03%												%wiersza	9.28%	15.46%	16.49%	22.68%	13.40%	10.31%	5.15%	3.09%	1.03%	1.03%	1.03%	1.03%
Sportsmen	11	21	24	10	17	4	2	4	3	3	0	0	99											P	3	12	14	6	11	2	1	0	3	0	0	0	52
%wiersza	11.11%	21.21%	24.24%	10.10%	17.17%	4.04%	2.02%	4.04%	3.03%	3.03%	0.00%	0.00%												%wiersza	5.77%	23.08%	26.92%	11.54%	21.15%	3.85%	1.92%	0.00%	5.77%	0.00%	0.00%	0.00%
Razem	20	36	40	32	30	14	7	7	4	4	1	1	196											E	8	9	10	4	6	2	1	4	0	3	0	0	47
																								%wiersza	17.02%	19.15%	21.28%	8.51%	12.77%	4.26%	2.13%	8.51%	0.00%	6.38%	0.00%	0.00%
																								Razem	20	36	40	32	30	14	7	7	4	4	1	1	196
Tabela dwudzielcza: liczności obserwowane (imdik-mito2.sta)																								Tabela dwudzielcza: liczności obserwowane (imdik-mito3.sta)
	NS_VAR	NS_VAR	NS_VAR	NS_VAR	NS_VAR	NS_VAR	NS_VAR	NS_VAR	NS_VAR	NS_VAR	Wiersz														NS_VAR	NS_VAR	NS_VAR	NS_VAR	NS_VAR	NS_VAR	NS_VAR	NS_VAR	NS_VAR	NS_VAR	Wiersz
	G_1:2	G_2:3	G_3:4	G_4:5	G_5:6	G_6:7	G_7:8	G_8:9	G_9:10	G_10:11	Razem														G_1:2	G_2:3	G_3:4	G_4:5	G_5:6	G_6:7	G_7:8	G_8:9	G_9:10	G_10:11	Razem
Controls	12	20	9	10	17	12	10	3	2	2	97													Controls	12	20	9	10	17	12	10	3	2	2	97
%wiersza	12.37%	20.62%	9.28%	10.31%	17.53%	12.37%	10.31%	3.09%	2.06%	2.06%														%wiersza	12.37%	20.62%	9.28%	10.31%	17.53%	12.37%	10.31%	3.09%	2.06%	2.06%
Sportsmen	19	23	13	9	8	10	10	3	2	2	99													P	5	15	11	6	2	3	5	3	1	1	52
%wiersza	19.19%	23.23%	13.13%	9.09%	8.08%	10.10%	10.10%	3.03%	2.02%	2.02%														%wiersza	9.62%	28.85%	21.15%	11.54%	3.85%	5.77%	9.62%	5.77%	1.92%	1.92%
Razem	31	43	22	19	25	22	20	6	4	4	196													E	14	8	2	3	6	7	5	0	1	1	47
																								%wiersza	29.79%	17.02%	4.26%	6.38%	12.77%	14.89%	10.64%	0.00%	2.13%	2.13%
																								Razem	31	43	22	19	25	22	20	6	4	4	196
Tabela dwudzielcza: liczności obserwowane (imdik-mito2.sta)																								Tabela dwudzielcza: liczności obserwowane (imdik-mito3.sta)
	S_VAR	S_VAR	S_VAR	S_VAR	S_VAR	S_VAR	S_VAR	S_VAR	S_VAR	S_VAR	S_VAR	S_VAR	S_VAR	S_VAR	S_VAR	S_VAR	S_VAR	S_VAR	S_VAR	S_VAR	S_VAR	Wiersz			S_VAR	S_VAR	S_VAR	S_VAR	S_VAR	S_VAR	S_VAR	S_VAR	S_VAR	S_VAR	S_VAR	S_VAR	S_VAR	S_VAR	S_VAR	S_VAR	S_VAR	S_VAR	S_VAR	S_VAR	S_VAR	Wiersz
	G_1:0	G_2:1	G_3:2	G_4:3	G_5:4	G_6:5	G_7:6	G_8:7	G_9:8	G_10:9	G_11:10	G_12:11	G_13:12	G_14:13	G_15:14	G_16:15	G_17:16	G_18:17	G_19:18	G_20:19	G_21:20	Razem			G_1:0	G_2:1	G_3:2	G_4:3	G_5:4	G_6:5	G_7:6	G_8:7	G_9:8	G_10:9	G_11:10	G_12:11	G_13:12	G_14:13	G_15:14	G_16:15	G_17:16	G_18:17	G_19:18	G_20:19	G_21:20	Razem
Controls	1	9	9	15	3	3	8	5	2	2	5	8	7	7	4	4	1	1	1	1	1	97		Controls	1	9	9	15	3	3	8	5	2	2	5	8	7	7	4	4	1	1	1	1	1	97
%wiersza	1.03%	9.28%	9.28%	15.46%	3.09%	3.09%	8.25%	5.15%	2.06%	2.06%	5.15%	8.25%	7.22%	7.22%	4.12%	4.12%	1.03%	1.03%	1.03%	1.03%	1.03%			%wiersza	1.03%	9.28%	9.28%	15.46%	3.09%	3.09%	8.25%	5.15%	2.06%	2.06%	5.15%	8.25%	7.22%	7.22%	4.12%	4.12%	1.03%	1.03%	1.03%	1.03%	1.03%
Sportsmen	1	8	16	13	5	4	5	4	4	3	1	11	7	8	2	3	3	1	0	0	0	99		P	0	4	6	8	3	3	2	3	3	1	0	6	4	5	1	1	1	1	0	0	0	52
%wiersza	1.01%	8.08%	16.16%	13.13%	5.05%	4.04%	5.05%	4.04%	4.04%	3.03%	1.01%	11.11%	7.07%	8.08%	2.02%	3.03%	3.03%	1.01%	0.00%	0.00%	0.00%			%wiersza	0.00%	7.69%	11.54%	15.38%	5.77%	5.77%	3.85%	5.77%	5.77%	1.92%	0.00%	11.54%	7.69%	9.62%	1.92%	1.92%	1.92%	1.92%	0.00%	0.00%	0.00%
Razem	2	17	25	28	8	7	13	9	6	5	6	19	14	15	6	7	4	2	1	1	1	196		E	1	4	10	5	2	1	3	1	1	2	1	5	3	3	1	2	2	0	0	0	0	47
																								%wiersza	2.13%	8.51%	21.28%	10.64%	4.26%	2.13%	6.38%	2.13%	2.13%	4.26%	2.13%	10.64%	6.38%	6.38%	2.13%	4.26%	4.26%	0.00%	0.00%	0.00%	0.00%
																								Razem	2	17	25	28	8	7	13	9	6	5	6	19	14	15	6	7	4	2	1	1	1	196
[truncated: 50 more columns]

## Sheet: Variables
ID	ID
GROUP	Group
DNA_FROM	DNA from
AGE	Age
SEX	Sex
SPORTTYP	Sport type (Power/Endurance)
HAPLOGRP	mtDNA haplogroup
HET_VAR	Heteroplasmic mtDNA variant count
RARE_VAR	Rare mtDNA variants
NS_VAR	Non-synonymous (NS) mtDNA variants
S_VAR	Synonymous (S) mtDNA variants
MCOPYNUM	mtDNA copy number (mean MT-ND1/B2M)
NS_PROP	=NS_VAR/(NS_VAR+S_VAR);NS to NS+S ratio

## Sheet: FDR Rare
Multiple comparisons using False Discovery Rates (FDRs)											Set maximum acceptable FDR:	0.05
2-COLUMN INPUT AREA		OUTPUT AREA						Classical one-stage method*				Two-stage sharpened method†					Graphically sharpened method‡
								FDR-derived		FDR-adjusted		Stage 1	Stage 2		FDR-adjusted		Point		FDR-derived		FDR-adjusted
Hypothesis		Unique			Ascending	Hypothesis		significance		p-values		significance	significance		p-values		estimates of	Best	significance		p-values
name	p-values	rank		Order	p-values	name		thresholds		a.k.a. q-values		thresholds	thresholds		a.k.a. q-values		no. of H0s	estimate	thresholds		a.k.a. q-values
P+E vs C	0.170182	1		1	0.170182	P+E vs C		0.0125		0.356168		0.0119048	0.0119048		0.373976		4		0.0125		0.356168
P vs E	0.756788	4		2	0.257414	E vs C		0.025		0.356168		0.0238095	0.0238095		0.373976		4		0.025		0.356168
E vs C	0.257414	2		3	0.267126	P vs C		0.0375		0.356168		0.0357143	0.0357143		0.373976		2.72898		0.0375		0.356168
P vs C	0.267126	3		4	0.756788	P vs E		0.05		0.756788		0.047619	0.047619		0.794627		4	True	0.05		0.756788

## Sheet: FDR Heteroplasmic
Multiple comparisons using False Discovery Rates (FDRs)											Set maximum acceptable FDR:	0.05
2-COLUMN INPUT AREA		OUTPUT AREA						Classical one-stage method*				Two-stage sharpened method†					Graphically sharpened method‡
								FDR-derived		FDR-adjusted		Stage 1	Stage 2		FDR-adjusted		Point		FDR-derived		FDR-adjusted
Hypothesis		Unique			Ascending	Hypothesis		significance		p-values		significance	significance		p-values		estimates of	Best	significance		p-values
name	p-values	rank		Order	p-values	name		thresholds		a.k.a. q-values		thresholds	thresholds		a.k.a. q-values		no. of H0s	estimate	thresholds		a.k.a. q-values
P+E vs C	0.00793276	1		1	0.00793276	P+E vs C		0.0125	*	0.0273618		0.0119048	0.0238095	*	0.014365		4		#VALUE!	#VALUE!	#VALUE!
P vs E	0.50629	4		2	0.0136809	E vs C		0.025	*	0.0273618		0.0238095	0.047619	*	0.014365		3.04161		#VALUE!	#VALUE!	#VALUE!
E vs C	0.0136809	2		3	0.0697582	P vs C		0.0375		0.0930109		0.0357143	0.0714286	!	0.0488307		2.14998		#VALUE!	#VALUE!	#VALUE!
P vs C	0.0697582	3		4	0.50629	P vs E		0.05		0.50629		0.047619	0.0952381		0.265802		2.02548		#VALUE!	#VALUE!	#VALUE!
																		True

## Sheet: FDR Protein
Multiple comparisons using False Discovery Rates (FDRs)											Set maximum acceptable FDR:	0.05
2-COLUMN INPUT AREA		OUTPUT AREA						Classical one-stage method*				Two-stage sharpened method†					Graphically sharpened method‡
								FDR-derived		FDR-adjusted		Stage 1	Stage 2		FDR-adjusted		Point		FDR-derived		FDR-adjusted
Hypothesis		Unique			Ascending	Hypothesis		significance		p-values		significance	significance		p-values		estimates of	Best	significance		p-values
name	p-values	rank		Order	p-values	name		thresholds		a.k.a. q-values		thresholds	thresholds		a.k.a. q-values		no. of H0s	estimate	thresholds		a.k.a. q-values
Synonymous P+E vs C	0.469556	5		1	0.144969	Non-synonymous P+E vs C		0.00416667		0.860503		0.00396825	0.00396825		0.903528		12		0.00416667		0.860503
Synonymous P vs E	0.510304	7		2	0.170038	Non-synonymous E vs C		0.00833333		0.860503		0.00793651	0.00793651		0.903528		12		0.00833333		0.860503
Synonymous E vs C	0.348883	4		3	0.306313	Non-synonymous P vs C		0.0125		0.860503		0.0119048	0.0119048		0.903528		12		0.0125		0.860503
Synonymous P vs C	0.788794	11		4	0.348883	Synonymous E vs C		0.0166667		0.860503		0.015873	0.015873		0.903528		12		0.0166667		0.860503
Non-synonymous P+E vs C	0.144969	1		5	0.469556	Synonymous P+E vs C		0.0208333		0.860503		0.0198413	0.0198413		0.903528		12		0.0208333		0.860503
Non-synonymous P vs E	0.486745	6		6	0.486745	Non-synonymous P vs E		0.025		0.860503		0.0238095	0.0238095		0.903528		12		0.025		0.860503
Non-synonymous E vs C	0.170038	2		7	0.510304	Synonymous P vs E		0.0291667		0.860503		0.0277778	0.0277778		0.903528		12		0.0291667		0.860503
Non-synonymous P vs C	0.306313	3		8	0.625566	NS/(NS+S) P vs E		0.0333333		0.860503		0.031746	0.031746		0.903528		12		0.0333333		0.860503
NS/(NS+S) P+E vs C	0.975856	12		9	0.752756	NS/(NS+S) P vs C		0.0375		0.860503		0.0357143	0.0357143		0.903528		12		0.0375		0.860503
NS/(NS+S) P vs E	0.625566	8		10	0.775006	NS/(NS+S) E vs C		0.0416667		0.860503		0.0396825	0.0396825		0.903528		12		0.0416667		0.860503
NS/(NS+S) E vs C	0.775006	10		11	0.788794	Synonymous P vs C		0.0458333		0.860503		0.0436508	0.0436508		0.903528		9.46945		0.0458333		0.860503
NS/(NS+S) P vs C	0.752756	9		12	0.975856	NS/(NS+S) P+E vs C		0.05		0.975856		0.047619	0.047619		1.02465		12	True	0.05		0.975856

## Sheet: FDR Copy number
Multiple comparisons using False Discovery Rates (FDRs)											Set maximum acceptable FDR:	0.05
2-COLUMN INPUT AREA		OUTPUT AREA						Classical one-stage method*				Two-stage sharpened method†					Graphically sharpened method‡
								FDR-derived		FDR-adjusted		Stage 1	Stage 2		FDR-adjusted		Point		FDR-derived		FDR-adjusted
Hypothesis		Unique			Ascending	Hypothesis		significance		p-values		significance	significance		p-values		estimates of	Best	significance		p-values
name	p-values	rank		Order	p-values	name		thresholds		a.k.a. q-values		thresholds	thresholds		a.k.a. q-values		no. of H0s	estimate	thresholds		a.k.a. q-values
Blood P+E vs C	0.000280136	3		1	9.02706e-06	C Saliva vs Blood		0.00416667	*	0.000108325		0.00396825	0.00793651	*	5.68705e-05		12		#VALUE!	#VALUE!	#VALUE!
Blood P vs E	0.0787211	8		2	5.03643e-05	Blood E vs C		0.00833333	*	0.000302186		0.00793651	0.015873	*	0.000158647		11.0006		#VALUE!	#VALUE!	#VALUE!
Blood E vs C	5.03643e-05	2		3	0.000280136	Blood P+E vs C		0.0125	*	0.00112055		0.0119048	0.0238095	*	0.000588286		10.0028		#VALUE!	#VALUE!	#VALUE!
Blood P vs C	0.126901	9		4	0.00330943	P+E Saliva vs Blood		0.0166667	*	0.0099283		0.015873	0.031746	*	0.00521236		9.02988		#VALUE!	#VALUE!	#VALUE!
Saliva P+E vs C	0.0343325	7		5	0.0117824	E Saliva vs Blood		0.0208333	*	0.0282778		0.0198413	0.0396825	*	0.0148458		8.09538		#VALUE!	#VALUE!	#VALUE!
Saliva P vs E	0.352498	11		6	0.0237533	Saliva P vs C		0.025	*	0.0475066		0.0238095	0.047619	*	0.024941		7.17032		#VALUE!	#VALUE!	#VALUE!
Saliva E vs C	0.637355	12		7	0.0343325	Saliva P+E vs C		0.0291667		0.0588557		0.0277778	0.0555556	*	0.0308993		6.21332		#VALUE!	#VALUE!	#VALUE!
Saliva P vs C	0.0237533	6		8	0.0787211	Blood P vs E		0.0333333		0.118082		0.031746	0.0634921		0.0619928		5.42724		#VALUE!	#VALUE!	#VALUE!
P+E Saliva vs Blood	0.00330943	4		9	0.126901	Blood P vs C		0.0375		0.169201		0.0357143	0.0714286		0.0888306		4.58138		#VALUE!	#VALUE!	#VALUE!
E Saliva vs Blood	0.0117824	5		10	0.188888	P Saliva vs Blood		0.0416667		0.226666		0.0396825	0.0793651		0.118999		3.69863		#VALUE!	#VALUE!	#VALUE!
P Saliva vs Blood	0.188888	10		11	0.352498	Saliva P vs E		0.0458333		0.384544		0.0436508	0.0873016		0.201885		3.0888		#VALUE!	#VALUE!	#VALUE!
C Saliva vs Blood	9.02706e-06	1		12	0.637355	Saliva E vs C		0.05		0.637355		0.047619	0.0952381		0.334611		2.75752		#VALUE!	#VALUE!	#VALUE!
																		True

## Sheet: SNV statistics
		Sportsmen vs Control										P vs E										E vs Control										P vs Control
Variable		Test U Manna-Whitneya (Mito-SNV3-10.sta) Względem zmiennej: Group Zaznaczone wyniki są istotne z p <.05000										Test U Manna-Whitneya (Mito-SNV3-10.sta) Względem zmiennej: Sport type (endurance/power) Zaznaczone wyniki są istotne z p <.05000										Test U Manna-Whitneya (Mito-SNV3-10.sta) Względem zmiennej: Sport type (endurance/power) Zaznaczone wyniki są istotne z p <.05000										Test U Manna-Whitneya (Mito-SNV3-10.sta) Względem zmiennej: Sport type (endurance/power) Zaznaczone wyniki są istotne z p <.05000										Variable	Group=Sportsmen Statystyki opisowe (Mito-SNV2.sta)
	Reliable	Sum.rang	Sum.rang	U	Z	p	Z	p	N ważn.	N ważn.		Sum.rang	Sum.rang	U	Z	p	Z	p	N ważn.	N ważn.		Sum.rang	Sum.rang	U	Z	p	Z	p	N ważn.	N ważn.		Sum.rang	Sum.rang	U	Z	p	Z	p	N ważn.	N ważn.			Nważnych	Średnia	Mediana	Minimum	Maksimum	Dolny kwartyl	Górny kwartyl
m.73A>G	1	9492.5	9813.5	4739.5	-0.156151	0.875914	-0.162717	0.870741	97	99		2245.5	2704.5	1117.5	-0.732245	0.46402	-0.769462	0.441619	47	52		7123.5	3316.5	2188.5	0.387716	0.698227	0.404274	0.686011	97	47		7122	4053	2369	-0.609325	0.54231	-0.63144	0.527754	97	52		m.73A>G	99	54.4941	99.8093	0	100	0	99.9099
m.194C>T	1	9802	9504	4554	0.623346	0.533058	2.28229	0.0224728	97	99		2350	2600	1222	0	1			47	52		7150	3290	2162	0.500622	0.616638	1.57842	0.114471	97	47		7405	3770	2392	0.517727	0.604649	1.65947	0.0970221	97	52		m.194C>T	99	0	0	0	0	0	0
m.195T>C	1	9355	9951	4602	-0.502455	0.615348	-0.682031	0.49522	97	99		2253	2697	1125	-0.679691	0.4967	-0.904102	0.365942	47	52		7033	3407	2279	0.00213031	0.9983	0.00296338	0.997636	97	47		7075	4100	2322	-0.796503	0.42574	-1.07193	0.283753	97	52		m.195T>C	99	24.2004	0	0	100	0	0
m.204T>C	1	9814	9492	4542	0.653569	0.51339	1.51511	0.129745	97	99		2404	2546	1168	0.378385	0.705145	1.10912	0.267379	47	52		7106	3334	2206	0.313155	0.754163	0.653325	0.513547	97	47		7461	3714	2336	0.740748	0.458847	1.70778	0.0876773	97	52		m.204T>C	99	3.07896	0	0	99.7701	0	0
m.207G>A	1	9756.5	9549.5	4599.5	0.508751	0.610927	1.48405	0.137798	97	99		2402	2548	1170	0.364371	0.715582	1.49511	0.134887	47	52		7078.5	3361.5	2233.5	0.195988	0.84462	0.493712	0.62151	97	47		7431	3744	2366	0.621272	0.534421	1.82404	0.0681463	97	52		m.207G>A	99	2.01293	0	0	99.6739	0	0
m.709G>A	1	9849	9457	4507	0.741719	0.458258	1.21894	0.222869	97	99		2542	2408	1030	1.34537	0.178507	2.46582	0.0136705	47	52		6975	3465	2222	-0.244985	0.806468	-0.365298	0.714889	97	47		7627	3548	2170	1.40185	0.160962	2.41895	0.0155661	97	52		m.709G>A	99	11.0919	0	0	99.962	0	0
m.1438A>G	1	9641.5	9664.5	4714.5	0.219116	0.82656	0.219205	0.82649	97	99		2376	2574	1196	0.182185	0.855437	0.182279	0.855364	47	52		7011.5	3428.5	2258.5	-0.0894728	0.928706	-0.0895264	0.928664	97	47		7383	3792	2414	0.430112	0.667115	0.430212	0.667042	97	52		m.1438A>G	99	97.8669	99.8999	0	100	99.8374	99.9477
m.2706A>G	1	9843.5	9462.5	4512.5	0.727867	0.466696	0.751946	0.452084	97	99		2371	2579	1201	0.14715	0.883014	0.152669	0.87866	47	52		7153.5	3286.5	2158.5	0.515534	0.60618	0.531395	0.595145	97	47		7443	3732	2354	0.669063	0.503456	0.690848	0.489662	97	52		m.2706A>G	99	58.4871	99.7461	0	100	0	99.8478
m.4769A>G	1	10134.5	9171.5	4221.5	1.46077	0.144079	1.46369	0.14328	97	99		2527	2423	1045	1.24026	0.21488	1.24288	0.213912	47	52		7114	3326	2198	0.34724	0.728411	0.348277	0.727632	97	47		7773.5	3401.5	2023.5	1.98528	0.0471137	1.98772	0.0468436	97	52		m.4769A>G	99	98.8658	99.8805	0	100	99.8066	99.9515
m.5460G>A	1	9605	9701	4751	0.127188	0.898792	0.31887	0.749825	97	99		2333.5	2616.5	1205.5	-0.115618	0.907956	-0.304678	0.760612	47	52		7070.5	3369.5	2241.5	0.161903	0.871382	0.407849	0.683385	97	47		7287.5	3887.5	2509.5	0.0497814	0.960297	0.120565	0.904036	97	52		m.5460G>A	99	5.03283	0	0	99.9005	0	0
m.7028C>T	1	10101	9205	4255	1.3764	0.168699	1.42198	0.155033	97	99		2454	2496	1118	0.728741	0.46616	0.756084	0.449599	47	52		7194	3246	2118	0.688089	0.491397	0.709319	0.478127	97	47		7660	3515	2137	1.53327	0.125211	1.58322	0.113372	97	52		m.7028C>T	99	58.474	99.695	0	100	0	99.8474
m.8251G>A	1	9753	9553	4603	0.499936	0.61712	1.31115	0.189809	97	99		2379.5	2570.5	1192.5	0.20671	0.836236	0.696077	0.486381	47	52		7097	3343	2215	0.274809	0.783463	0.654994	0.512472	97	47		7409	3766	2388	0.533657	0.593579	1.36618	0.171885	97	52		m.8251G>A	99	3.0232	0	0	99.8583	0	0
m.8994G>A	1	9802	9504	4554	0.623346	0.533058	2.28229	0.0224728	97	99		2350	2600	1222	0	1			47	52		7150	3290	2162	0.500622	0.616638	1.57842	0.114471	97	47		7405	3770	2392	0.517727	0.604649	1.65947	0.0970221	97	52		m.8994G>A	99	0	0	0	0	0	0
m.11719G>A	1	9998	9308	4358	1.11699	0.264001	1.18189	0.237249	97	99		2334	2616	1206	-0.112114	0.910733	-0.119596	0.904803	47	52		7246	3194	2066	0.90964	0.363013	0.964221	0.334936	97	47		7505	3670	2292	0.915979	0.359679	0.962876	0.33561	97	52		m.11719G>A	99	50.4192	99.5591	0	100	0	99.8568
m.11947A>G	1	9802	9504	4554	0.623346	0.533058	2.28229	0.0224728	97	99		2350	2600	1222	0	1			47	52		7150	3290	2162	0.500622	0.616638	1.57842	0.114471	97	47		7405	3770	2392	0.517727	0.604649	1.65947	0.0970221	97	52		m.11947A>G	99	0	0	0	0	0	0
m.12414T>C	1	9802	9504	4554	0.623346	0.533058	2.28229	0.0224728	97	99		2350	2600	1222	0	1			47	52		7150	3290	2162	0.500622	0.616638	1.57842	0.114471	97	47		7405	3770	2392	0.517727	0.604649	1.65947	0.0970221	97	52		m.12414T>C	99	0	0	0	0	0	0
m.12705C>T	1	9909	9397	4447	0.892833	0.371947	1.93695	0.0527522	97	99		2356	2594	1216	0.0420428	0.966465	0.123236	0.901921	47	52		7194	3246	2118	0.688089	0.491397	1.38416	0.166312	97	47		7468	3707	2329	0.768625	0.442116	1.57033	0.11634	97	52		m.12705C>T	99	4.03041	0	0	99.8468	0	0
m.14766C>T	1	10170.5	9135.5	4185.5	1.55144	0.120797	1.6448	0.100012	97	99		2254	2696	1126	-0.672684	0.501149	-0.720691	0.4711	47	52		7382	3058	1930	1.48908	0.136466	1.58275	0.11348	97	47		7541.5	3633.5	2255.5	1.06134	0.288536	1.11568	0.26456	97	52		m.14766C>T	99	49.3752	0	0	100	0	99.7665
m.16223C>T	1	9853.5	9452.5	4502.5	0.753052	0.451419	1.50314	0.132804	97	99		2305	2645	1177	-0.315321	0.752518	-0.762453	0.44579	47	52		7221.5	3218.5	2090.5	0.805255	0.420673	1.56652	0.117227	97	47		7385	3790	2412	0.438077	0.661331	0.815175	0.414973	97	52		m.16223C>T	99	6.03781	0	0	99.8367	0	0
m.16234C>T	1	9509	9797	4756	-0.114595	0.908766	-0.419573	0.674798	97	99		2328	2622	1200	-0.154157	0.877486	-0.519108	0.603686	47	52		7032	3408	2279	-0.00213031	0.9983	-0.00861062	0.99313	97	47		7230	3945	2477	-0.179213	0.85777	-0.640061	0.522133	97	52		m.16234C>T	99	3.0134	0	0	99.9168	0	0
m.16519T>C	1	9621.5	9684.5	4734.5	0.168744	0.865998	0.173712	0.862092	97	99		2572	2378	1000	1.55558	0.119808	1.61423	0.106479	47	52		6839.5	3600.5	2086.5	-0.822298	0.410908	-0.841441	0.400101	97	47		7535	3640	2262	1.03545	0.300458	1.06753	0.285735	97	52		m.16519T>C	99	58.4871	99.7046	0	100	0	99.896
m.477T>C	1	9564.5	9741.5	4791.5	0.0251857	0.979907	0.0734677	0.941434	97	99		2354	2596	1218	0.0280285	0.977639	0.0821571	0.934522	47	52		7033.5	3406.5	2278.5	0.00426061	0.996601	0.0123061	0.990181	97	47		7284	3891	2513	0.0358426	0.971408	0.105233	0.916191	97	52		m.477T>C	99	4.0076	0	0	99.5726	0	0
m.3010G>A	1	9425.5	9880.5	4672.5	-0.324896	0.74526	-0.430537	0.666806	97	99		2430	2520	1142	0.56057	0.575091	0.724231	0.468925	47	52		6898.5	3541.5	2145.5	-0.570922	0.568053	-0.750861	0.452737	97	47		7280	3895	2517	0.0199126	0.984113	0.0270913	0.978387	97	52		m.3010G>A	99	26.2195	0	0	99.9633	0	99.7036
m.499G>A	1	9346.5	9959.5	4593.5	-0.523863	0.600374	-1.10329	0.269904	97	99		2208	2742	1080	-0.995012	0.319731	-1.90272	0.0570785	47	52		7072.5	3367.5	2239.5	0.170424	0.864676	0.429315	0.667694	97	47		7027	4148	2274	-0.987664	0.323318	-1.95116	0.0510385	97	52		m.499G>A	99	10.0526	0	0	100	0	0
m.1811A>G	1	9236	10070	4483	-0.802165	0.422458	-1.18788	0.234881	97	99		2251.5	2698.5	1123.5	-0.690202	0.490068	-0.965575	0.334258	47	52		6982	3458	2229	-0.215161	0.829642	-0.337377	0.735833	97	47		7007	4168	2254	-1.06731	0.285831	-1.56609	0.11733	97	52		m.1811A>G	99	21.181	0	0	100	0	0
m.4646T>C	1	9414	9892	4661	-0.353859	0.723445	-0.767677	0.442679	97	99		2235.5	2714.5	1107.5	-0.802316	0.422371	-1.60882	0.107657	47	52		7076.5	3363.5	2235.5	0.187467	0.851295	0.472246	0.636751	97	47		7090.5	4084.5	2337.5	-0.734774	0.462478	-1.50117	0.133313	97	52		m.4646T>C	99	9.07674	0	0	99.9224	0	0
m.5999T>C	1	9418	9888	4665	-0.343785	0.731008	-0.745822	0.455776	97	99		2243.5	2706.5	1115.5	-0.746259	0.455511	-1.49641	0.134548	47	52		7072.5	3367.5	2239.5	0.170424	0.864676	0.429315	0.667694	97	47		7098.5	4076.5	2345.5	-0.702914	0.48211	-1.43608	0.150981	97	52		m.5999T>C	99	9.06393	0	0	99.8434	0	0
m.6047A>G	1	9414	9892	4661	-0.353859	0.723445	-0.767677	0.442679	97	99		2240.5	2709.5	1112.5	-0.76728	0.442915	-1.53856	0.123912	47	52		7073.5	3366.5	2238.5	0.174685	0.861327	0.440048	0.659903	97	47		7093.5	4081.5	2340.5	-0.722827	0.469787	-1.47676	0.139741	97	52		m.6047A>G	99	9.07217	0	0	99.9177	0	0
m.11332C>T	1	9406	9900	4653	-0.374008	0.708399	-0.811388	0.417143	97	99		2241.5	2708.5	1113.5	-0.760273	0.447092	-1.52451	0.127382	47	52		7072.5	3367.5	2239.5	0.170424	0.864676	0.429315	0.667694	97	47		7086.5	4088.5	2333.5	-0.750704	0.452831	-1.53371	0.125101	97	52		m.11332C>T	99	9.07562	0	0	99.8821	0	0
m.11467A>G	1	9129	10177	4376	-1.07165	0.283877	-1.37026	0.170605	97	99		2247.5	2702.5	1119.5	-0.718231	0.472616	-0.873568	0.382354	47	52		6939.5	3500.5	2186.5	-0.396237	0.691931	-0.532225	0.59457	97	47		6942.5	4232.5	2189.5	-1.32419	0.185442	-1.6828	0.0924144	97	52		m.11467A>G	99	31.2638	0	0	100	0	99.7681
m.12308A>G	1	9186	10120	4433	-0.928093	0.35336	-1.19474	0.232188	97	99		2230	2720	1102	-0.840855	0.40043	-1.03387	0.301198	47	52		6997	3443	2244	-0.151252	0.879777	-0.205448	0.837223	97	47		6942	4233	2189	-1.32618	0.184782	-1.68533	0.091925	97	52		m.12308A>G	99	30.2618	0	0	99.9657	0	99.8243
m.12372G>A	1	9199	10107	4446	-0.895352	0.3706	-1.14484	0.252277	97	99		2206.5	2743.5	1078.5	-1.00552	0.314646	-1.223	0.221332	47	52		6997.5	3442.5	2244.5	-0.149121	0.881458	-0.2003	0.841246	97	47		6954.5	4220.5	2201.5	-1.2764	0.201816	-1.62207	0.10479	97	52		m.12372G>A	99	31.2482	0	0	100	0	99.7188
m.13708G>A	1	9765	9541	4591	0.530159	0.596002	0.967363	0.333363	97	99		2340	2610	1212	-0.0700713	0.944137	-0.14051	0.888257	47	52		7141.5	3298.5	2170.5	0.464407	0.642357	0.828758	0.407242	97	47		7376.5	3798.5	2420.5	0.404225	0.686047	0.714125	0.47515	97	52		m.13708G>A	99	9.07237	0	0	100	0	0
m.14620C>T	1	9421	9885	4668	-0.336229	0.736698	-0.72943	0.465739	97	99		2238.5	2711.5	1110.5	-0.781295	0.43463	-1.56666	0.117194	47	52		7077.5	3362.5	2234.5	0.191727	0.847956	0.482979	0.629111	97	47		7096.5	4078.5	2343.5	-0.710879	0.47716	-1.45235	0.146405	97	52		m.14620C>T	99	9.06231	0	0	99.9154	0	0
m.15693T>C	1	9403	9903	4650	-0.381563	0.702786	-0.82778	0.407796	97	99		2239.5	2710.5	1111.5	-0.774288	0.438761	-1.55261	0.120517	47	52		7072.5	3367.5	2239.5	0.170424	0.864676	0.429315	0.667694	97	47		7083.5	4091.5	2330.5	-0.762652	0.445672	-1.55812	0.119205	97	52		m.15693T>C	99	9.07847	0	0	100	0	0
m.16356T>C	1	9495	9811	4742	-0.149855	0.880879	-0.347396	0.728294	97	99		2338	2612	1210	-0.0840855	0.932988	-0.189212	0.849926	47	52		7020	3420	2267	-0.0532576	0.957527	-0.126937	0.898991	97	47		7228	3947	2475	-0.187178	0.851521	-0.431537	0.666078	97	52		m.16356T>C	99	7.04707	0	0	100	0	0
m.522_523dup	1	9258	10048	4505	-0.746756	0.455211	-1.26677	0.20524	97	99		2270	2680	1142	-0.56057	0.575091	-0.874679	0.381749	47	52		6971.5	3468.5	2218.5	-0.259897	0.794943	-0.476353	0.633823	97	47		7039.5	4135.5	2286.5	-0.937882	0.348306	-1.58292	0.113441	97	52		m.522_523dup	99	12.8671	0	0	97.4901	0	0
m.152T>C	1	9342.5	9963.5	4589.5	-0.533937	0.593386	-0.829643	0.406741	97	99		2413	2537	1159	0.441449	0.658888	0.656384	0.511577	47	52		6865.5	3574.5	2112.5	-0.711522	0.476761	-1.0962	0.272994	97	47		7230	3945	2477	-0.179213	0.85777	-0.290424	0.771492	97	52		m.152T>C	99	18.1253	0	0	100	0	0
m.16311T>C	1	9314.5	9991.5	4561.5	-0.604457	0.54554	-0.916125	0.359602	97	99		2345	2605	1217	-0.0350356	0.972051	-0.0509838	0.959338	47	52		6921	3519	2168	-0.475058	0.634746	-0.731898	0.464231	97	47		7146.5	4028.5	2393.5	-0.511753	0.608824	-0.786274	0.431708	97	52		m.16311T>C	99	18.239	0	0	100	0	0
m.239T>C	1	9655.5	9650.5	4700.5	0.254376	0.799206	0.852403	0.393991	97	99		2303	2647	1175	-0.329335	0.741903	-1.35135	0.176585	47	52		7126.5	3313.5	2185.5	0.400497	0.68879	1.40684	0.159477	97	47		7282	3893	2515	0.0278776	0.97776	0.0818481	0.934768	97	52		m.239T>C	99	2.01615	0	0	99.8924	0	0
m.16362T>C	1	9696	9610	4660	0.356378	0.721558	0.773141	0.439439	97	99		2304	2646	1176	-0.322328	0.747205	-0.779396	0.435747	47	52		7146	3294	2166	0.483579	0.628685	1.04999	0.293725	97	47		7303	3872	2494	0.11151	0.911212	0.22782	0.819787	97	52		m.16362T>C	99	6.04184	0	0	100	0	0
m.8818C>T	1	9460.5	9845.5	4707.5	-0.236746	0.812854	-0.620896	0.534669	97	99		2257	2693	1129	-0.651663	0.514619	-1.57574	0.115088	47	52		7079	3361	2233	0.198118	0.842953	0.62465	0.532201	97	47		7134.5	4040.5	2381.5	-0.559543	0.575791	-1.35515	0.175371	97	52		m.8818C>T	99	6.04802	0	0	99.9069	0	0
m.146T>C	1	9711	9595	4645	0.394156	0.693466	0.988181	0.323065	97	99		2404	2546	1168	0.378385	0.705145	1.10912	0.267379	47	52		7056	3384	2256	0.100124	0.920246	0.2272	0.820269	97	47		7408	3767	2389	0.529675	0.596338	1.35598	0.175106	97	52		m.146T>C	99	4.02767	0	0	99.7801	0	0
m.1189T>C	1	9611	9695	4745	0.142299	0.886844	0.356755	0.721275	97	99		2429.5	2520.5	1142.5	0.557067	0.577482	1.46799	0.142107	47	52		6982.5	3457.5	2229.5	-0.213031	0.831303	-0.483403	0.62881	97	47		7381.5	3793.5	2415.5	0.424138	0.671466	1.15682	0.247347	97	52		m.1189T>C	99	5.03848	0	0	99.9197	0	0
m.3480A>G	1	9565.5	9740.5	4790.5	0.0277043	0.977898	0.066673	0.946842	97	99		2454	2496	1118	0.728741	0.46616	1.76211	0.0780512	47	52		6938	3502	2185	-0.402628	0.687222	-0.874218	0.382	97	47		7380.5	3794.5	2416.5	0.420155	0.674372	1.14596	0.251814	97	52		m.3480A>G	99	6.04319	0	0	99.9275	0	0
m.9055G>A	1	9551.5	9754.5	4798.5	-0.00755571	0.993971	-0.0159128	0.987304	97	99		2405	2545	1167	0.385392	0.699947	0.815425	0.41483	47	52		6974	3466	2221	-0.249246	0.803171	-0.501381	0.616103	97	47		7330.5	3844.5	2466.5	0.22103	0.82507	0.487538	0.625878	97	52		m.9055G>A	99	8.07003	0	0	99.9751	0	0
m.9698T>C	1	9550	9756	4797	-0.0113336	0.990957	-0.0253841	0.979749	97	99		2434	2516	1138	0.588599	0.556131	1.32449	0.185342	47	52		6946	3494	2193	-0.368543	0.712469	-0.768879	0.441966	97	47		7357	3818	2440	0.326566	0.743996	0.790905	0.429	97	52		m.9698T>C	99	7.05768	0	0	99.8518	0	0
m.10398A>G	1	9710.5	9595.5	4645.5	0.392897	0.694396	0.588481	0.55621	97	99		2351	2599	1221	0.00700713	0.994409	0.0109335	0.991277	47	52		7114	3326	2198	0.34724	0.728411	0.509965	0.610076	97	47		7349.5	3825.5	2447.5	0.296697	0.766698	0.441763	0.658661	97	52		m.10398A>G	99	16.1299	0	0	100	0	0
m.10550A>G	1	9607	9699	4749	0.132225	0.894806	0.331498	0.740268	97	99		2429.5	2520.5	1142.5	0.557067	0.577482	1.46799	0.142107	47	52		6978.5	3461.5	2225.5	-0.230073	0.818035	-0.522076	0.601618	97	47		7381.5	3793.5	2415.5	0.424138	0.671466	1.15682	0.247347	97	52		m.10550A>G	99	5.03993	0	0	99.9403	0	0
m.11299T>C	1	9612	9694	4744	0.144818	0.884855	0.36307	0.716553	97	99		2428.5	2521.5	1143.5	0.55006	0.582279	1.44953	0.147191	47	52		6982.5	3457.5	2229.5	-0.213031	0.831303	-0.483403	0.62881	97	47		7382.5	3792.5	2414.5	0.42812	0.668564	1.16768	0.242936	97	52		m.11299T>C	99	5.03645	0	0	99.788	0	0
m.14167C>T	1	9560.5	9745.5	4795.5	0.0151114	0.987943	0.0363671	0.97099	97	99		2454	2496	1118	0.728741	0.46616	1.76211	0.0780512	47	52		6934	3506	2181	-0.41967	0.674727	-0.911222	0.362179	97	47		7379.5	3795.5	2417.5	0.416173	0.677284	1.1351	0.256336	97	52		m.14167C>T	99	6.0441	0	0	99.9531	0	0
m.14798T>C	1	9714	9592	4642	0.401712	0.687896	0.693095	0.48825	97	99		2434	2516	1138	0.588599	0.556131	1.0788	0.28068	47	52		7031	3409	2278	-0.00639092	0.994901	-0.0104112	0.991693	97	47		7436	3739	2361	0.641185	0.521403	1.13275	0.257321	97	52		m.14798T>C	99	11.0905	0	0	100	0	0
m.16224T>C	1	9617	9689	4739	0.157411	0.874921	0.394641	0.693108	97	99		2428.5	2521.5	1143.5	0.55006	0.582279	1.44953	0.147191	47	52		6989.5	3450.5	2236.5	-0.183206	0.854636	-0.415727	0.67761	97	47		7380.5	3794.5	2416.5	0.420155	0.674372	1.14596	0.251814	97	52		m.16224T>C	99	5.02881	0	0	99.8431	0	0
m.228G>A	1	9651	9655	4705	0.243042	0.807973	0.584904	0.558612	97	99		2379	2571	1193	0.203207	0.838974	0.535494	0.592308	47	52		7049	3391	2263	0.0703001	0.943955	0.159523	0.873257	97	47		7355	3820	2442	0.318601	0.750029	0.771615	0.440343	97	52		m.228G>A	99	5.04297	0	0	100	0	0
m.930G>A	1	9865	9441	4491	0.782016	0.434206	1.882	0.0598372	97	99		2428	2522	1144	0.546556	0.584684	1.84047	0.0656995	47	52		7109	3331	2203	0.325937	0.744472	0.679991	0.496511	97	47		7509	3666	2288	0.931909	0.351384	2.25697	0.0240104	97	52		m.930G>A	99	3.02166	0	0	99.8035	0	0
m.1888G>A	1	9804.5	9501.5	4551.5	0.629643	0.528929	1.22651	0.220008	97	99		2435	2515	1137	0.595606	0.551439	1.34025	0.180164	47	52		7065.5	3374.5	2246.5	0.1406	0.888186	0.250908	0.801885	97	47		7492	3683	2305	0.864206	0.387475	1.70727	0.0877733	97	52		m.1888G>A	99	7.05791	0	0	100	0	0
m.4216T>C	1	9875	9431	4481	0.807202	0.419551	1.18227	0.237098	97	99		2387.5	2562.5	1184.5	0.262767	0.79273	0.421209	0.673603	47	52		7150.5	3289.5	2161.5	0.502752	0.615139	0.70828	0.478772	97	47		7477.5	3697.5	2319.5	0.806459	0.419979	1.1669	0.24325	97	52		m.4216T>C	99	15.1311	0	0	99.9686	0	0
m.4917A>G	1	9811	9495	4545	0.646013	0.518271	1.2584	0.208249	97	99		2430	2520	1142	0.56057	0.575091	1.26142	0.20716	47	52		7078	3362	2234	0.193858	0.846287	0.345948	0.729382	97	47		7486	3689	2311	0.840311	0.400735	1.66006	0.096903	97	52		m.4917A>G	99	7.0568	0	0	99.9411	0	0
m.5147G>A	1	9751	9555	4605	0.494899	0.620672	1.10844	0.267674	97	99		2432.5	2517.5	1139.5	0.578088	0.563205	1.52339	0.127662	47	52		7041	3399	2271	0.0362152	0.971111	0.0728503	0.941925	97	47		7463	3712	2334	0.748713	0.454031	1.72615	0.0843217	97	52		m.5147G>A	99	5.044	0	0	99.9588	0	0
m.8697G>A	1	9813	9493	4543	0.65105	0.515014	1.26821	0.204724	97	99		2433	2517	1139	0.581592	0.560842	1.30872	0.19063	47	52		7076	3364	2236	0.185337	0.852965	0.330742	0.74084	97	47		7490	3685	2307	0.856241	0.391865	1.69153	0.0907361	97	52		m.8697G>A	99	7.05203	0	0	99.925	0	0
m.10463T>C	1	9787	9519	4569	0.585568	0.558167	1.09072	0.275398	97	99		2461	2489	1111	0.777791	0.436693	1.6457	0.0998269	47	52		7031	3409	2278	-0.00639092	0.994901	-0.0108663	0.99133	97	47		7509	3666	2288	0.931909	0.351384	1.78476	0.0743007	97	52		m.10463T>C	99	8.07015	0	0	100	0	0
m.11251A>G	1	9793	9513	4563	0.600679	0.548054	0.899699	0.368281	97	99		2385.5	2564.5	1186.5	0.248753	0.803552	0.398744	0.690082	47	52		7109.5	3330.5	2202.5	0.328067	0.742861	0.474879	0.634874	97	47		7436.5	3738.5	2360.5	0.643176	0.52011	0.957647	0.338242	97	52		m.11251A>G	99	15.1297	0	0	100	0	0
m.11812A>G	1	9905	9401	4451	0.882759	0.377367	1.9151	0.0554812	97	99		2403	2547	1169	0.371378	0.710356	1.08858	0.276339	47	52		7151	3289	2161	0.504882	0.613642	0.982185	0.32601	97	47		7507	3668	2290	0.923944	0.355516	1.95796	0.0502355	97	52		m.11812A>G	99	4.03344	0	0	99.9659	0	0
m.13368G>A	1	9832	9474	4524	0.698903	0.484613	1.36142	0.173381	97	99		2431	2519	1141	0.567577	0.570322	1.27718	0.201538	47	52		7091	3349	2221	0.249246	0.803171	0.444791	0.656471	97	47		7494	3681	2303	0.872171	0.383116	1.723	0.084889	97	52		m.13368G>A	99	7.05572	0	0	99.8971	0	0
m.14233A>G	1	9906	9400	4450	0.885277	0.376008	1.92056	0.0547882	97	99		2403	2547	1169	0.371378	0.710356	1.08858	0.276339	47	52		7149	3291	2163	0.496361	0.61964	0.965608	0.334241	97	47		7510	3665	2287	0.935891	0.34933	1.98328	0.0473371	97	52		m.14233A>G	99	4.03239	0	0	99.905	0	0
m.14905G>A	1	9814.5	9491.5	4541.5	0.654828	0.512579	1.27557	0.202108	97	99		2435	2515	1137	0.595606	0.551439	1.34025	0.180164	47	52		7072.5	3367.5	2239.5	0.170424	0.864676	0.304131	0.761028	97	47		7495	3680	2302	0.876153	0.380947	1.73087	0.0834759	97	52		m.14905G>A	99	7.05542	0	0	100	0	0
m.15452C>A	1	9860	9446	4496	0.769423	0.441643	1.15244	0.249141	97	99		2400.5	2549.5	1171.5	0.35386	0.723444	0.567228	0.57056	47	52		7129.5	3310.5	2182.5	0.413279	0.679402	0.598219	0.549694	97	47		7483.5	3691.5	2313.5	0.830354	0.406339	1.23634	0.216333	97	52		m.15452C>A	99	15.1174	0	0	99.9349	0	0
m.15607A>G	1	9804	9502	4552	0.628383	0.529753	1.22406	0.220932	97	99		2433	2517	1139	0.581592	0.560842	1.30872	0.19063	47	52		7068	3372	2244	0.151252	0.879777	0.269916	0.787225	97	47		7489	3686	2308	0.852258	0.394071	1.68366	0.0922474	97	52		m.15607A>G	99	7.05756	0	0	99.9608	0	0
m.15928G>A	1	9799.5	9506.5	4556.5	0.61705	0.537202	1.20198	0.229372	97	99		2432	2518	1140	0.574584	0.565573	1.29295	0.196029	47	52		7063	3377	2249	0.129949	0.896607	0.2319	0.816616	97	47		7489.5	3685.5	2307.5	0.85425	0.392967	1.6876	0.0914881	97	52		m.15928G>A	99	7.05886	0	0	100	0	0
m.16126T>C	1	9797	9509	4559	0.610753	0.541363	0.904432	0.365767	97	99		2388.5	2561.5	1183.5	0.269774	0.787334	0.432441	0.665421	47	52		7105	3335	2207	0.308894	0.757402	0.440973	0.659233	97	47		7445	3730	2352	0.677028	0.498389	0.993412	0.32051	97	52		m.16126T>C	99	15.1086	0	0	99.9385	0	0
m.16294C>T	1	9904	9402	4452	0.88024	0.37873	1.63959	0.101091	97	99		2435	2515	1137	0.595606	0.551439	1.34025	0.180164	47	52		7114	3326	2198	0.34724	0.728411	0.5904	0.554923	97	47		7543	3632	2254	1.06731	0.285831	1.98606	0.0470272	97	52		m.16294C>T	99	7.04039	0	0	100	0	0
m.16304T>C	1	9816	9490	4540	0.658606	0.510149	1.13633	0.25582	97	99		2461	2489	1111	0.777791	0.436693	1.48733	0.136927	47	52		7049	3391	2263	0.0703001	0.943955	0.112299	0.910587	97	47		7520	3655	2277	0.975716	0.329206	1.72374	0.0847549	97	52		m.16304T>C	99	10.068	0	0	99.8988	0	0
m.16093T>C	1	9464.5	9841.5	4711.5	-0.226671	0.820679	-0.507681	0.611677	97	99		2358	2592	1214	0.056057	0.955296	0.118607	0.905587	47	52		6982.5	3457.5	2229.5	-0.213031	0.831303	-0.483403	0.62881	97	47		7235	3940	2482	-0.159301	0.873432	-0.367266	0.713421	97	52		m.16093T>C	99	6.8309	0	0	98.7603	0	0
m.249del	1	9609	9697	4747	0.137262	0.890824	0.502565	0.61527	97	99		2303	2647	1175	-0.329335	0.741903	-1.35135	0.176585	47	52		7103	3337	2209	0.300373	0.763893	1.2141	0.224711	97	47		7259	3916	2506	-0.0637202	0.949193	-0.204242	0.838164	97	52		m.249del	99	1.9859	0	0	98.4252	0	0
m.489T>C	1	9560	9746	4796	0.0138521	0.988948	0.0263694	0.978963	97	99		2320	2630	1192	-0.210214	0.833501	-0.401982	0.687697	47	52		7070.5	3369.5	2241.5	0.161903	0.871382	0.314962	0.752791	97	47		7242.5	3932.5	2489.5	-0.129432	0.897016	-0.240848	0.809673	97	52		m.489T>C	99	10.0717	0	0	100	0	0
m.9545A>G	1	9606	9700	4750	0.129706	0.896799	0.474901	0.634858	97	99		2303	2647	1175	-0.329335	0.741903	-1.35135	0.176585	47	52		7103	3337	2209	0.300373	0.763893	1.2141	0.224711	97	47		7256	3919	2503	-0.0756678	0.939683	-0.242538	0.808364	97	52		m.9545A>G	99	2.00884	0	0	99.7418	0	0
m.11914G>A	1	9557.5	9748.5	4798.5	0.00755571	0.993971	0.0220403	0.982416	97	99		2406	2544	1166	0.392399	0.694764	1.1502	0.250062	47	52		6980	3460	2227	-0.223682	0.823005	-0.600257	0.548335	97	47		7330.5	3844.5	2466.5	0.22103	0.82507	0.708466	0.478656	97	52		m.11914G>A	99	4.03275	0	0	99.8639	0	0
m.15043G>A	1	9655	9651	4701	0.253116	0.800179	0.73835	0.460302	97	99		2330	2620	1202	-0.140143	0.888547	-0.471917	0.636987	47	52		7099	3341	2213	0.283331	0.776924	0.818356	0.413155	97	47		7309	3866	2488	0.135406	0.892291	0.369313	0.711894	97	52		m.15043G>A	99	3.02216	0	0	99.9059	0	0
m.15301G>A	1	9506	9800	4753	-0.122151	0.90278	-0.447237	0.654704	97	99		2329	2621	1201	-0.14715	0.883014	-0.495512	0.620239	47	52		7030	3410	2277	-0.0106515	0.991501	-0.0430531	0.965659	97	47		7229	3946	2476	-0.183196	0.854645	-0.654285	0.512929	97	52		m.15301G>A	99	3.02433	0	0	99.8336	0	0
m.16129G>A	1	9651	9655	4705	0.243042	0.807973	0.584904	0.558612	97	99		2379	2571	1193	0.203207	0.838974	0.535494	0.592308	47	52		7051	3389	2261	0.0788213	0.937175	0.178859	0.858048	97	47		7353	3822	2444	0.310636	0.756077	0.752325	0.451856	97	52		m.16129G>A	99	5.03041	0	0	99.9596	0	0
m.16298T>C	1	9564.5	9741.5	4791.5	0.0251857	0.979907	0.0530426	0.957698	97	99		2408	2542	1164	0.406413	0.684439	0.859902	0.389843	47	52		6980	3460	2227	-0.223682	0.823005	-0.449958	0.652741	97	47		7337.5	3837.5	2459.5	0.248907	0.803433	0.549029	0.582986	97	52		m.16298T>C	99	8.0552	0	0	99.8413	0	0
m.72T>C	1	9555.5	9750.5	4800.5	0.00251857	0.99799	0.00606118	0.995164	97	99		2409	2541	1163	0.413421	0.679299	0.99966	0.317476	47	52		6976.5	3463.5	2223.5	-0.238594	0.81142	-0.541412	0.588224	97	47		7332	3843	2465	0.227003	0.820421	0.581135	0.56115	97	52		m.72T>C	99	6.04985	0	0	99.8811	0	0
m.93A>G	1	9458.5	9847.5	4705.5	-0.241783	0.808949	-0.810204	0.417823	97	99		2353	2597	1219	0.0210214	0.983229	0.0616178	0.950867	47	52		6982.5	3457.5	2229.5	-0.213031	0.831303	-0.748317	0.45427	97	47		7229	3946	2476	-0.183196	0.854645	-0.654285	0.512929	97	52		m.93A>G	99	4.03397	0	0	99.9502	0	0
m.4580G>A	1	9558	9748	4798	0.008815	0.992967	0.0231185	0.981556	97	99		2428.5	2521.5	1143.5	0.55006	0.582279	1.44953	0.147191	47	52		6957	3483	2204	-0.321676	0.747698	-0.766698	0.443262	97	47		7354	3821	2443	0.314619	0.753051	0.923715	0.355636	97	52		m.4580G>A	99	5.04154	0	0	99.9535	0	0
m.15904C>T	1	9608	9698	4748	0.134744	0.892815	0.337813	0.735505	97	99		2432.5	2517.5	1139.5	0.578088	0.563205	1.52339	0.127662	47	52		6976.5	3463.5	2223.5	-0.238594	0.81142	-0.541412	0.588224	97	47		7384.5	3790.5	2412.5	0.436085	0.662775	1.18941	0.234281	97	52		m.15904C>T	99	5.04127	0	0	100	0	0
m.199T>C	1	9559	9747	4797	0.0113336	0.990957	0.0379783	0.969705	97	99		2378.5	2571.5	1193.5	0.199703	0.841713	0.672481	0.501278	47	52		7007	3433	2254	-0.108646	0.913484	-0.34255	0.731937	97	47		7305	3870	2492	0.119475	0.904899	0.426708	0.669593	97	52		m.199T>C	99	3.01922	0	0	99.6552	0	0
m.456C>T	1	9694	9612	4662	0.351341	0.725333	0.814483	0.415369	97	99		2283	2667	1155	-0.469478	0.638729	-1.23718	0.216022	47	52		7168	3272	2144	0.577313	0.563729	1.37599	0.168824	97	47		7279	3896	2518	0.0159301	0.98729	0.0337579	0.97307	97	52		m.456C>T	99	5.031	0	0	100	0	0
m.1719G>A	1	9604	9702	4752	0.124669	0.900786	0.387771	0.698186	97	99		2330	2620	1202	-0.140143	0.888547	-0.471917	0.636987	47	52		7076	3364	2236	0.185337	0.852965	0.58435	0.558985	97	47		7281	3894	2516	0.0238951	0.980936	0.0701556	0.94407	97	52		m.1719G>A	99	3.02549	0	0	99.9681	0	0
m.15924A>G	1	9502	9804	4749	-0.132225	0.894806	-0.364589	0.715419	97	99		2381	2569	1191	0.217221	0.828036	0.572425	0.567034	47	52		6975	3465	2222	-0.244985	0.806468	-0.657424	0.510909	97	47		7280	3895	2517	0.0199126	0.984113	0.058463	0.95338	97	52		m.15924A>G	99	5.04593	0	0	99.9776	0	0
m.520_523dup	1	9558.5	9747.5	4797.5	0.0100743	0.991962	0.0293871	0.976556	97	99		2306	2644	1178	-0.308314	0.757844	-0.903728	0.36614	47	52		7078	3362	2234	0.193858	0.846287	0.611217	0.541056	97	47		7233.5	3941.5	2480.5	-0.165274	0.868728	-0.450779	0.652149	97	52		m.520_523dup	99	3.68694	0	0	92.074	0	0
m.150C>T	1	9486	9820	4733	-0.172522	0.863027	-0.353419	0.723774	97	99		2391	2559	1181	0.287292	0.773889	0.576083	0.56456	47	52		6959	3481	2206	-0.313155	0.754163	-0.629941	0.528734	97	47		7280	3895	2517	0.0199126	0.984113	0.0421974	0.966341	97	52		m.150C>T	99	9.0763	0	0	100	0	0
m.3197T>C	1	9352.5	9953.5	4599.5	-0.508751	0.610927	-1.07146	0.283963	97	99		2317	2633	1189	-0.231235	0.817132	-0.442181	0.658359	47	52		6972.5	3467.5	2219.5	-0.255637	0.798232	-0.580084	0.561858	97	47		7133	4042	2380	-0.565517	0.571722	-1.19841	0.23076	97	52		m.3197T>C	99	10.0884	0	0	100	0	0
m.7768A>G	1	9460.5	9845.5	4707.5	-0.236746	0.812854	-0.793325	0.427589	97	99		2406	2544	1166	0.392399	0.694764	1.1502	0.250062	47	52		6934	3506	2181	-0.41967	0.674727	-1.32318	0.185775	97	47		7279.5	3895.5	2517.5	0.0179213	0.985702	0.0736584	0.941282	97	52		m.7768A>G	99	4.03308	0	0	99.9492	0	0
m.9477G>A	1	9355.5	9950.5	4602.5	-0.501195	0.616234	-1.05555	0.291175	97	99		2310	2640	1182	-0.280285	0.779259	-0.535976	0.591975	47	52		6977.5	3462.5	2224.5	-0.234334	0.814726	-0.531744	0.594904	97	47		7131	4044	2378	-0.573482	0.566319	-1.21529	0.224258	97	52		m.9477G>A	99	10.0738	0	0	99.8941	0	0
m.13617T>C	1	9351.5	9954.5	4598.5	-0.51127	0.609163	-1.07677	0.281585	97	99		2310	2640	1182	-0.280285	0.779259	-0.535982	0.591971	47	52		6975.5	3464.5	2222.5	-0.242855	0.808118	-0.55108	0.581579	97	47		7129	4046	2376	-0.581447	0.560939	-1.23217	0.217887	97	52		m.13617T>C	99	10.0894	0	0	100	0	0
m.14182T>C	1	9409	9897	4656	-0.366452	0.714028	-1.13981	0.254366	97	99		2430.5	2519.5	1141.5	0.564074	0.572704	1.48646	0.137159	47	52		6883.5	3556.5	2130.5	-0.634831	0.525539	-1.83361	0.0667129	97	47		7278.5	3896.5	2518.5	0.0139388	0.988879	0.0572899	0.954314	97	52		m.14182T>C	99	5.0459	0	0	99.9543	0	0
m.16270C>T	1	9360.5	9945.5	4607.5	-0.488603	0.625123	-1.02903	0.303468	97	99		2314	2636	1186	-0.252257	0.800843	-0.482379	0.629537	47	52		6977.5	3462.5	2224.5	-0.234334	0.814726	-0.531744	0.594904	97	47		7136	4039	2383	-0.55357	0.579874	-1.17309	0.240761	97	52		m.16270C>T	99	10.0758	0	0	100	0	0
m.14793A>G	1	9452.5	9853.5	4699.5	-0.256894	0.797261	-0.673738	0.500478	97	99		2259	2691	1131	-0.637649	0.523703	-1.54185	0.123111	47	52		7076	3364	2236	0.185337	0.852965	0.58435	0.558985	97	47		7129.5	4045.5	2376.5	-0.579456	0.562282	-1.40337	0.160506	97	52		m.14793A>G	99	6.0522	0	0	99.9325	0	0
m.16256C>T	1	9457	9849	4704	-0.245561	0.806023	-0.590965	0.554544	97	99		2238	2712	1110	-0.784798	0.432572	-1.76598	0.0773997	47	52		7099	3341	2213	0.283331	0.776924	0.818356	0.413155	97	47		7111	4064	2358	-0.653133	0.513671	-1.44065	0.149684	97	52		m.16256C>T	99	7.05969	0	0	99.9383	0	0
m.4336T>C	1	9700	9606	4656	0.366452	0.714028	1.01043	0.312289	97	99		2279.5	2670.5	1151.5	-0.494002	0.621305	-1.66351	0.0962122	47	52		7173.5	3266.5	2138.5	0.600746	0.54801	1.73516	0.0827133	97	47		7279.5	3895.5	2517.5	0.0179213	0.985702	0.0434033	0.96538	97	52		m.4336T>C	99	3.02643	0	0	99.9231	0	0
m.16296C>T	1	9808	9498	4548	0.638458	0.523176	1.60066	0.109452	97	99		2428	2522	1144	0.546556	0.584684	1.84047	0.0656995	47	52		7078	3362	2234	0.193858	0.846287	0.42092	0.673814	97	47		7483	3692	2314	0.828363	0.407465	2.12063	0.0339536	97	52		m.16296C>T	99	3.01875	0	0	99.7159	0	0
m.185G>A	1	9563.5	9742.5	4792.5	0.0226671	0.981916	0.0545507	0.956496	97	99		2361	2589	1211	0.0770784	0.938561	0.186377	0.852149	47	52		7027	3413	2274	-0.0234334	0.981305	-0.0558522	0.95546	97	47		7289.5	3885.5	2507.5	0.0577465	0.953951	0.139855	0.888774	97	52		m.185G>A	99	6.01283	0	0	99.8433	0	0
m.295C>T	1	9550.5	9755.5	4797.5	-0.0100743	0.991962	-0.0212178	0.983072	97	99		2308.5	2641.5	1180.5	-0.290796	0.771208	-0.61536	0.538317	47	52		7073.5	3366.5	2238.5	0.174685	0.861327	0.379292	0.704471	97	47		7230	3945	2477	-0.179213	0.85777	-0.366152	0.714252	97	52		m.295C>T	99	8.06965	0	0	100	0	0
m.462C>T	1	9616.5	9689.5	4739.5	0.156151	0.875914	0.338762	0.734789	97	99		2333	2617	1205	-0.119121	0.905179	-0.268051	0.78866	47	52		7080	3360	2232	0.202379	0.839621	0.439422	0.660356	97	47		7289.5	3885.5	2507.5	0.0577465	0.953951	0.122373	0.902604	97	52		m.462C>T	99	7.0216	0	0	99.5638	0	0
m.12612A>G	1	9517	9789	4764	-0.0944464	0.924755	-0.193478	0.846585	97	99		2335.5	2614.5	1207.5	-0.101603	0.919072	-0.203737	0.838559	47	52		7029.5	3410.5	2276.5	-0.0127818	0.989802	-0.0266663	0.978726	97	47		7240.5	3934.5	2487.5	-0.137397	0.890717	-0.280706	0.778936	97	52		m.12612A>G	99	9.06593	0	0	99.9466	0	0
m.16069C>T	1	9555.5	9750.5	4800.5	0.00251857	0.99799	0.00530426	0.995768	97	99		2310	2640	1182	-0.280285	0.779259	-0.593036	0.553157	47	52		7075	3365	2237	0.181076	0.856308	0.393167	0.694196	97	47		7233.5	3941.5	2480.5	-0.165274	0.868728	-0.337661	0.735619	97	52		m.16069C>T	99	8.06561	0	0	99.9116	0	0
m.522_523del	1	9516	9790	4763	-0.0969649	0.922754	-0.1673	0.867134	97	99		2340.5	2609.5	1212.5	-0.0665677	0.946926	-0.113415	0.909701	47	52		7023.5	3416.5	2270.5	-0.0383455	0.969412	-0.0667428	0.946786	97	47		7245.5	3929.5	2492.5	-0.117484	0.906476	-0.202725	0.83935	97	52		m.522_523del	99	12.2832	0	0	100	0	0
m.16172T>C	1	9505	9801	4752	-0.124669	0.900786	-0.456458	0.648061	97	99		2329	2621	1201	-0.14715	0.883014	-0.495512	0.620239	47	52		7030	3410	2277	-0.0106515	0.991501	-0.0430531	0.965659	97	47		7228	3947	2475	-0.187178	0.851521	-0.668508	0.50381	97	52		m.16172T>C	99	3.02668	0	0	99.8958	0	0
m.188A>G	1	9657.5	9648.5	4698.5	0.259413	0.795317	0.869282	0.384694	97	99		2352	2598	1220	0.0140143	0.988819	0.0575041	0.954144	47	52		7079	3361	2233	0.198118	0.842953	0.62465	0.532201	97	47		7331.5	3843.5	2465.5	0.225012	0.82197	0.721231	0.470768	97	52		m.188A>G	99	2.01432	0	0	99.7839	0	0
m.15218A>G	1	9413	9893	4660	-0.356378	0.721558	-1.10848	0.267657	97	99		2284	2666	1156	-0.46247	0.643744	-1.21871	0.222955	47	52		7031	3409	2278	-0.00639092	0.994901	-0.0258319	0.979391	97	47		7135	4040	2382	-0.557552	0.577151	-1.63696	0.101639	97	52		m.15218A>G	99	5.03928	0	0	99.8378	0	0
m.16291C>T	1	9316	9990	4563	-0.600679	0.548054	-1.65627	0.0976673	97	99		2335	2615	1207	-0.105107	0.916291	-0.236516	0.813033	47	52		6935	3505	2182	-0.41541	0.677842	-1.30975	0.190281	97	47		7134	4041	2381	-0.561535	0.574434	-1.64866	0.0992192	97	52		m.16291C>T	99	6.07623	0	0	99.9358	0	0
m.16399A>G	1	9311.5	9994.5	4558.5	-0.612013	0.54053	-1.6877	0.0914691	97	99		2330	2620	1202	-0.140143	0.888547	-0.315453	0.752418	47	52		6933.5	3506.5	2180.5	-0.4218	0.673171	-1.32991	0.183548	97	47		7131	4044	2378	-0.573482	0.566319	-1.684	0.0921833	97	52		m.16399A>G	99	7.06052	0	0	100	0	0
m.15833C>T	1	9653.5	9652.5	4702.5	0.249338	0.803099	0.835523	0.403424	97	99		2303	2647	1175	-0.329335	0.741903	-1.35135	0.176585	47	52		7126.5	3313.5	2185.5	0.400497	0.68879	1.40684	0.159477	97	47		7280	3895	2517	0.0199126	0.984113	0.058463	0.95338	97	52		m.15833C>T	99	2.01715	0	0	99.8747	0	0
m.13934C>T	1	9553	9753	4800	-0.00377786	0.996986	-0.0126594	0.9899	97	99		2378.5	2571.5	1193.5	0.199703	0.841713	0.672481	0.501278	47	52		7003	3437	2250	-0.125688	0.899979	-0.396284	0.691896	97	47		7303	3872	2494	0.11151	0.911212	0.39826	0.690439	97	52		m.13934C>T	99	3.02574	0	0	99.8714	0	0
m.497C>T	1	9515	9791	4762	-0.0994835	0.920754	-0.309433	0.756992	97	99		2404	2546	1168	0.378385	0.705145	1.10912	0.267379	47	52		6962	3478	2209	-0.300373	0.763893	-0.86758	0.385625	97	47		7306	3869	2491	0.123458	0.901745	0.440931	0.659263	97	52		m.497C>T	99	4.02093	0	0	99.7468	0	0
m.16051A>G	1	9362.5	9943.5	4609.5	-0.483565	0.628695	-1.41058	0.15837	97	99		2358	2592	1214	0.056057	0.955296	0.135547	0.892179	47	52		6934	3506	2181	-0.41967	0.674727	-1.32318	0.185775	97	47		7181.5	3993.5	2428.5	-0.372365	0.709621	-1.19354	0.232658	97	52		m.16051A>G	99	6.04276	0	0	99.8575	0	0
m.13966A>G	1	9608	9698	4748	0.134744	0.892815	0.493344	0.62177	97	99		2352	2598	1220	0.0140143	0.988819	0.0575041	0.954144	47	52		7056	3384	2256	0.100124	0.920246	0.351709	0.725057	97	47		7305	3870	2492	0.119475	0.904899	0.426708	0.669593	97	52		m.13966A>G	99	2.01618	0	0	99.8899	0	0
[truncated: 92 more columns]

## Sheet: List p SNV3
Hipotezy wyselekcjonowane ze względu na liczebność
Nr	Genotypes	Groups	SNV	Hypothesis name	p
1	>=95% vs <5%	P+E vs C	m.73A>G	1. >=95% vs <5%, P+E vs C, m.73A>G	0.495942
2	>=95% vs <5%	P+E vs C	m.194C>T	2. >=95% vs <5%, P+E vs C, m.194C>T	0.0221154
3	>=95% vs <5%	P+E vs C	m.195T>C	3. >=95% vs <5%, P+E vs C, m.195T>C	0.569105
4	>=95% vs <5%	P+E vs C	m.204T>C	4. >=95% vs <5%, P+E vs C, m.204T>C	0.112401
5	>=95% vs <5%	P+E vs C	m.207G>A	5. >=95% vs <5%, P+E vs C, m.207G>A	0.140607
6	>=95% vs <5%	P+E vs C	m.709G>A	6. >=95% vs <5%, P+E vs C, m.709G>A	0.199446
7	>=95% vs <5%	P+E vs C	m.1438A>G	7. >=95% vs <5%, P+E vs C, m.1438A>G	0.237105
8	>=95% vs <5%	P+E vs C	m.2706A>G	8. >=95% vs <5%, P+E vs C, m.2706A>G	0.640077
9	>=95% vs <5%	P+E vs C	m.4769A>G	9. >=95% vs <5%, P+E vs C, m.4769A>G	0.0921719
10	>=95% vs <5%	P+E vs C	m.5460G>A	10. >=95% vs <5%, P+E vs C, m.5460G>A	0.729945
11	>=95% vs <5%	P+E vs C	m.7028C>T	11. >=95% vs <5%, P+E vs C, m.7028C>T	0.640077
12	>=95% vs <5%	P+E vs C	m.8251G>A	12. >=95% vs <5%, P+E vs C, m.8251G>A	0.182971
13	>=95% vs <5%	P+E vs C	m.8994G>A	13. >=95% vs <5%, P+E vs C, m.8994G>A	0.0221154
14	>=95% vs <5%	P+E vs C	m.11719G>A	14. >=95% vs <5%, P+E vs C, m.11719G>A	0.56225
15	>=95% vs <5%	P+E vs C	m.11947A>G	15. >=95% vs <5%, P+E vs C, m.11947A>G	0.0221154
16	>=95% vs <5%	P+E vs C	m.12414T>C	16. >=95% vs <5%, P+E vs C, m.12414T>C	0.0221154
17	>=95% vs <5%	P+E vs C	m.12705C>T	17. >=95% vs <5%, P+E vs C, m.12705C>T	0.0546034
18	>=95% vs <5%	P+E vs C	m.14766C>T	18. >=95% vs <5%, P+E vs C, m.14766C>T	0.47106
19	>=95% vs <5%	P+E vs C	m.16223C>T	19. >=95% vs <5%, P+E vs C, m.16223C>T	0.126139
20	>=95% vs <5%	P+E vs C	m.16234C>T	20. >=95% vs <5%, P+E vs C, m.16234C>T	0.667241
21	>=95% vs <5%	P+E vs C	m.16519T>C	21. >=95% vs <5%, P+E vs C, m.16519T>C	0.421272
22	>=95% vs <5%	P+E vs C	m.477T>C	22. >=95% vs <5%, P+E vs C, m.477T>C	0.976489
23	>=95% vs <5%	P+E vs C	m.3010G>A	23. >=95% vs <5%, P+E vs C, m.3010G>A	0.559836
24	>=95% vs <5%	P+E vs C	m.499G>A	24. >=95% vs <5%, P+E vs C, m.499G>A	0.316847
25	>=95% vs <5%	P+E vs C	m.1811A>G	25. >=95% vs <5%, P+E vs C, m.1811A>G	0.298764
26	>=95% vs <5%	P+E vs C	m.4646T>C	26. >=95% vs <5%, P+E vs C, m.4646T>C	0.44429
27	>=95% vs <5%	P+E vs C	m.5999T>C	27. >=95% vs <5%, P+E vs C, m.5999T>C	0.44429
28	>=95% vs <5%	P+E vs C	m.6047A>G	28. >=95% vs <5%, P+E vs C, m.6047A>G	0.44429
29	>=95% vs <5%	P+E vs C	m.11332C>T	29. >=95% vs <5%, P+E vs C, m.11332C>T	0.44429
30	>=95% vs <5%	P+E vs C	m.11467A>G	30. >=95% vs <5%, P+E vs C, m.11467A>G	0.173697
31	>=95% vs <5%	P+E vs C	m.12308A>G	31. >=95% vs <5%, P+E vs C, m.12308A>G	0.226849
32	>=95% vs <5%	P+E vs C	m.12372G>A	32. >=95% vs <5%, P+E vs C, m.12372G>A	0.173697
33	>=95% vs <5%	P+E vs C	m.13708G>A	33. >=95% vs <5%, P+E vs C, m.13708G>A	0.339093
34	>=95% vs <5%	P+E vs C	m.14620C>T	34. >=95% vs <5%, P+E vs C, m.14620C>T	0.44429
35	>=95% vs <5%	P+E vs C	m.15693T>C	35. >=95% vs <5%, P+E vs C, m.15693T>C	0.44429
36	>=95% vs <5%	P+E vs C	m.16356T>C	36. >=95% vs <5%, P+E vs C, m.16356T>C	0.803384
37	>=95% vs <5%	P+E vs C	m.522_523dup	37. >=95% vs <5%, P+E vs C, m.522_523dup	0.127484
38	>=95% vs <5%	P+E vs C	m.152T>C	38. >=95% vs <5%, P+E vs C, m.152T>C	0.375655
39	>=95% vs <5%	P+E vs C	m.16311T>C	39. >=95% vs <5%, P+E vs C, m.16311T>C	0.477693
40	>=95% vs <5%	P+E vs C	m.239T>C	40. >=95% vs <5%, P+E vs C, m.239T>C	0.625572
41	>=95% vs <5%	P+E vs C	m.16362T>C	41. >=95% vs <5%, P+E vs C, m.16362T>C	0.39687
42	>=95% vs <5%	P+E vs C	m.8818C>T	42. >=95% vs <5%, P+E vs C, m.8818C>T	0.537801
43	>=95% vs <5%	P+E vs C	m.146T>C	43. >=95% vs <5%, P+E vs C, m.146T>C	0.334083
44	>=95% vs <5%	P+E vs C	m.1189T>C	44. >=95% vs <5%, P+E vs C, m.1189T>C	0.729945
45	>=95% vs <5%	P+E vs C	m.3480A>G	45. >=95% vs <5%, P+E vs C, m.3480A>G	0.970896
46	>=95% vs <5%	P+E vs C	m.9055G>A	46. >=95% vs <5%, P+E vs C, m.9055G>A	0.966025
47	>=95% vs <5%	P+E vs C	m.9698T>C	47. >=95% vs <5%, P+E vs C, m.9698T>C	0.968393
48	>=95% vs <5%	P+E vs C	m.10398A>G	48. >=95% vs <5%, P+E vs C, m.10398A>G	0.531221
49	>=95% vs <5%	P+E vs C	m.10550A>G	49. >=95% vs <5%, P+E vs C, m.10550A>G	0.729945
50	>=95% vs <5%	P+E vs C	m.11299T>C	50. >=95% vs <5%, P+E vs C, m.11299T>C	0.729945
51	>=95% vs <5%	P+E vs C	m.14167C>T	51. >=95% vs <5%, P+E vs C, m.14167C>T	0.970896
52	>=95% vs <5%	P+E vs C	m.14798T>C	52. >=95% vs <5%, P+E vs C, m.14798T>C	0.485788
53	>=95% vs <5%	P+E vs C	m.16224T>C	53. >=95% vs <5%, P+E vs C, m.16224T>C	0.729945
54	>=95% vs <5%	P+E vs C	m.228G>A	54. >=95% vs <5%, P+E vs C, m.228G>A	0.716632
55	>=95% vs <5%	P+E vs C	m.930G>A	55. >=95% vs <5%, P+E vs C, m.930G>A	0.0681194
56	>=95% vs <5%	P+E vs C	m.1888G>A	56. >=95% vs <5%, P+E vs C, m.1888G>A	0.209862
57	>=95% vs <5%	P+E vs C	m.4216T>C	57. >=95% vs <5%, P+E vs C, m.4216T>C	0.178084
58	>=95% vs <5%	P+E vs C	m.4917A>G	58. >=95% vs <5%, P+E vs C, m.4917A>G	0.209862
59	>=95% vs <5%	P+E vs C	m.5147G>A	59. >=95% vs <5%, P+E vs C, m.5147G>A	0.250522
60	>=95% vs <5%	P+E vs C	m.8697G>A	60. >=95% vs <5%, P+E vs C, m.8697G>A	0.209862
61	>=95% vs <5%	P+E vs C	m.10463T>C	61. >=95% vs <5%, P+E vs C, m.10463T>C	0.228493
62	>=95% vs <5%	P+E vs C	m.11251A>G	62. >=95% vs <5%, P+E vs C, m.11251A>G	0.317715
63	>=95% vs <5%	P+E vs C	m.11812A>G	63. >=95% vs <5%, P+E vs C, m.11812A>G	0.0546034
64	>=95% vs <5%	P+E vs C	m.13368G>A	64. >=95% vs <5%, P+E vs C, m.13368G>A	0.209862
65	>=95% vs <5%	P+E vs C	m.14233A>G	65. >=95% vs <5%, P+E vs C, m.14233A>G	0.0546034
66	>=95% vs <5%	P+E vs C	m.14905G>A	66. >=95% vs <5%, P+E vs C, m.14905G>A	0.209862
67	>=95% vs <5%	P+E vs C	m.15452C>A	67. >=95% vs <5%, P+E vs C, m.15452C>A	0.317715
68	>=95% vs <5%	P+E vs C	m.15607A>G	68. >=95% vs <5%, P+E vs C, m.15607A>G	0.209862
69	>=95% vs <5%	P+E vs C	m.15928G>A	69. >=95% vs <5%, P+E vs C, m.15928G>A	0.209862
70	>=95% vs <5%	P+E vs C	m.16126T>C	70. >=95% vs <5%, P+E vs C, m.16126T>C	0.240146
71	>=95% vs <5%	P+E vs C	m.16294C>T	71. >=95% vs <5%, P+E vs C, m.16294C>T	0.0956826
72	>=95% vs <5%	P+E vs C	m.16304T>C	72. >=95% vs <5%, P+E vs C, m.16304T>C	0.260467
73	>=95% vs <5%	P+E vs C	m.16093T>C	73. >=95% vs <5%, P+E vs C, m.16093T>C	0.744886
74	>=95% vs <5%	P+E vs C	m.249del	74. >=95% vs <5%, P+E vs C, m.249del	0.633955
75	>=95% vs <5%	P+E vs C	m.489T>C	75. >=95% vs <5%, P+E vs C, m.489T>C	0.961589
76	>=95% vs <5%	P+E vs C	m.9545A>G	76. >=95% vs <5%, P+E vs C, m.9545A>G	0.633955
77	>=95% vs <5%	P+E vs C	m.11914G>A	77. >=95% vs <5%, P+E vs C, m.11914G>A	0.976489
78	>=95% vs <5%	P+E vs C	m.15043G>A	78. >=95% vs <5%, P+E vs C, m.15043G>A	0.45235
79	>=95% vs <5%	P+E vs C	m.15301G>A	79. >=95% vs <5%, P+E vs C, m.15301G>A	0.667241
80	>=95% vs <5%	P+E vs C	m.16129G>A	80. >=95% vs <5%, P+E vs C, m.16129G>A	0.527129
81	>=95% vs <5%	P+E vs C	m.16298T>C	81. >=95% vs <5%, P+E vs C, m.16298T>C	0.966025
82	>=95% vs <5%	P+E vs C	m.72T>C	82. >=95% vs <5%, P+E vs C, m.72T>C	0.970896
83	>=95% vs <5%	P+E vs C	m.93A>G	83. >=95% vs <5%, P+E vs C, m.93A>G	0.421429
84	>=95% vs <5%	P+E vs C	m.4580G>A	84. >=95% vs <5%, P+E vs C, m.4580G>A	0.973574
85	>=95% vs <5%	P+E vs C	m.15904C>T	85. >=95% vs <5%, P+E vs C, m.15904C>T	0.729945
86	>=95% vs <5%	P+E vs C	m.199T>C	86. >=95% vs <5%, P+E vs C, m.199T>C	0.979746
87	>=95% vs <5%	P+E vs C	m.456C>T	87. >=95% vs <5%, P+E vs C, m.456C>T	0.368536
88	>=95% vs <5%	P+E vs C	m.1719G>A	88. >=95% vs <5%, P+E vs C, m.1719G>A	0.680036
89	>=95% vs <5%	P+E vs C	m.15924A>G	89. >=95% vs <5%, P+E vs C, m.15924A>G	0.756609
90	>=95% vs <5%	P+E vs C	m.520_523dup	90. >=95% vs <5%, P+E vs C, m.520_523dup	1
91	>=95% vs <5%	P+E vs C	m.150C>T	91. >=95% vs <5%, P+E vs C, m.150C>T	0.469423
92	>=95% vs <5%	P+E vs C	m.3197T>C	92. >=95% vs <5%, P+E vs C, m.3197T>C	0.316847
93	>=95% vs <5%	P+E vs C	m.7768A>G	93. >=95% vs <5%, P+E vs C, m.7768A>G	0.421429
94	>=95% vs <5%	P+E vs C	m.9477G>A	94. >=95% vs <5%, P+E vs C, m.9477G>A	0.316847
95	>=95% vs <5%	P+E vs C	m.13617T>C	95. >=95% vs <5%, P+E vs C, m.13617T>C	0.316847
96	>=95% vs <5%	P+E vs C	m.14182T>C	96. >=95% vs <5%, P+E vs C, m.14182T>C	0.25963
97	>=95% vs <5%	P+E vs C	m.16270C>T	97. >=95% vs <5%, P+E vs C, m.16270C>T	0.199897
98	>=95% vs <5%	P+E vs C	m.14793A>G	98. >=95% vs <5%, P+E vs C, m.14793A>G	0.537801
99	>=95% vs <5%	P+E vs C	m.16256C>T	99. >=95% vs <5%, P+E vs C, m.16256C>T	0.575871
100	>=95% vs <5%	P+E vs C	m.4336T>C	100. >=95% vs <5%, P+E vs C, m.4336T>C	0.291345
101	>=95% vs <5%	P+E vs C	m.16296C>T	101. >=95% vs <5%, P+E vs C, m.16296C>T	0.177416
102	>=95% vs <5%	P+E vs C	m.185G>A	102. >=95% vs <5%, P+E vs C, m.185G>A	0.970896
103	>=95% vs <5%	P+E vs C	m.295C>T	103. >=95% vs <5%, P+E vs C, m.295C>T	0.966025
104	>=95% vs <5%	P+E vs C	m.462C>T	104. >=95% vs <5%, P+E vs C, m.462C>T	0.756693
105	>=95% vs <5%	P+E vs C	m.12612A>G	105. >=95% vs <5%, P+E vs C, m.12612A>G	0.833841
106	>=95% vs <5%	P+E vs C	m.16069C>T	106. >=95% vs <5%, P+E vs C, m.16069C>T	0.966025
107	>=95% vs <5%	P+E vs C	m.522_523del	107. >=95% vs <5%, P+E vs C, m.522_523del	0.865449
108	>=95% vs <5%	P+E vs C	m.16172T>C	108. >=95% vs <5%, P+E vs C, m.16172T>C	0.667241
109	>=95% vs <5%	P+E vs C	m.188A>G	109. >=95% vs <5%, P+E vs C, m.188A>G	0.392707
110	>=95% vs <5%	P+E vs C	m.15218A>G	110. >=95% vs <5%, P+E vs C, m.15218A>G	0.25963
111	>=95% vs <5%	P+E vs C	m.16291C>T	111. >=95% vs <5%, P+E vs C, m.16291C>T	0.152902
112	>=95% vs <5%	P+E vs C	m.16399A>G	112. >=95% vs <5%, P+E vs C, m.16399A>G	0.0939246
113	>=95% vs <5%	P+E vs C	m.15833C>T	113. >=95% vs <5%, P+E vs C, m.15833C>T	0.392707
114	>=95% vs <5%	P+E vs C	m.13934C>T	114. >=95% vs <5%, P+E vs C, m.13934C>T	0.979746
115	>=95% vs <5%	P+E vs C	m.497C>T	115. >=95% vs <5%, P+E vs C, m.497C>T	0.720773
116	>=95% vs <5%	P+E vs C	m.16051A>G	116. >=95% vs <5%, P+E vs C, m.16051A>G	0.157188
117	>=95% vs <5%	P+E vs C	m.13966A>G	117. >=95% vs <5%, P+E vs C, m.13966A>G	0.633955
118	>=95% vs <5%	P vs E	m.73A>G	118. >=95% vs <5%, P vs E, m.73A>G	0.508341
119	>=95% vs <5%	P vs E	m.195T>C	119. >=95% vs <5%, P vs E, m.195T>C	0.512692
120	>=95% vs <5%	P vs E	m.709G>A	120. >=95% vs <5%, P vs E, m.709G>A	0.0155477
121	>=95% vs <5%	P vs E	m.2706A>G	121. >=95% vs <5%, P vs E, m.2706A>G	0.849424
122	>=95% vs <5%	P vs E	m.5460G>A	122. >=95% vs <5%, P vs E, m.5460G>A	0.731226
123	>=95% vs <5%	P vs E	m.7028C>T	123. >=95% vs <5%, P vs E, m.7028C>T	0.849424
124	>=95% vs <5%	P vs E	m.11719G>A	124. >=95% vs <5%, P vs E, m.11719G>A	0.484315
125	>=95% vs <5%	P vs E	m.14766C>T	125. >=95% vs <5%, P vs E, m.14766C>T	0.362391
126	>=95% vs <5%	P vs E	m.16223C>T	126. >=95% vs <5%, P vs E, m.16223C>T	0.474178
127	>=95% vs <5%	P vs E	m.16519T>C	127. >=95% vs <5%, P vs E, m.16519T>C	0.313911
128	>=95% vs <5%	P vs E	m.3010G>A	128. >=95% vs <5%, P vs E, m.3010G>A	0.448667
129	>=95% vs <5%	P vs E	m.499G>A	129. >=95% vs <5%, P vs E, m.499G>A	0.0665027
130	>=95% vs <5%	P vs E	m.1811A>G	130. >=95% vs <5%, P vs E, m.1811A>G	0.332188
131	>=95% vs <5%	P vs E	m.4646T>C	131. >=95% vs <5%, P vs E, m.4646T>C	0.111579
132	>=95% vs <5%	P vs E	m.5999T>C	132. >=95% vs <5%, P vs E, m.5999T>C	0.111579
133	>=95% vs <5%	P vs E	m.6047A>G	133. >=95% vs <5%, P vs E, m.6047A>G	0.111579
134	>=95% vs <5%	P vs E	m.11332C>T	134. >=95% vs <5%, P vs E, m.11332C>T	0.111579
135	>=95% vs <5%	P vs E	m.11467A>G	135. >=95% vs <5%, P vs E, m.11467A>G	0.238322
136	>=95% vs <5%	P vs E	m.12308A>G	136. >=95% vs <5%, P vs E, m.12308A>G	0.155609
137	>=95% vs <5%	P vs E	m.12372G>A	137. >=95% vs <5%, P vs E, m.12372G>A	0.238322
138	>=95% vs <5%	P vs E	m.13708G>A	138. >=95% vs <5%, P vs E, m.13708G>A	0.848576
139	>=95% vs <5%	P vs E	m.14620C>T	139. >=95% vs <5%, P vs E, m.14620C>T	0.111579
140	>=95% vs <5%	P vs E	m.15693T>C	140. >=95% vs <5%, P vs E, m.15693T>C	0.111579
141	>=95% vs <5%	P vs E	m.16356T>C	141. >=95% vs <5%, P vs E, m.16356T>C	0.799658
142	>=95% vs <5%	P vs E	m.522_523dup	142. >=95% vs <5%, P vs E, m.522_523dup	0.416131
143	>=95% vs <5%	P vs E	m.152T>C	143. >=95% vs <5%, P vs E, m.152T>C	0.447843
144	>=95% vs <5%	P vs E	m.16311T>C	144. >=95% vs <5%, P vs E, m.16311T>C	0.847881
145	>=95% vs <5%	P vs E	m.16362T>C	145. >=95% vs <5%, P vs E, m.16362T>C	0.474178
146	>=95% vs <5%	P vs E	m.8818C>T	146. >=95% vs <5%, P vs E, m.8818C>T	0.11895
147	>=95% vs <5%	P vs E	m.1189T>C	147. >=95% vs <5%, P vs E, m.1189T>C	0.135002
148	>=95% vs <5%	P vs E	m.3480A>G	148. >=95% vs <5%, P vs E, m.3480A>G	0.0695542
149	>=95% vs <5%	P vs E	m.9055G>A	149. >=95% vs <5%, P vs E, m.9055G>A	0.374722
150	>=95% vs <5%	P vs E	m.9698T>C	150. >=95% vs <5%, P vs E, m.9698T>C	0.187995
151	>=95% vs <5%	P vs E	m.10398A>G	151. >=95% vs <5%, P vs E, m.10398A>G	0.825158
152	>=95% vs <5%	P vs E	m.10550A>G	152. >=95% vs <5%, P vs E, m.10550A>G	0.135002
153	>=95% vs <5%	P vs E	m.11299T>C	153. >=95% vs <5%, P vs E, m.11299T>C	0.135002
154	>=95% vs <5%	P vs E	m.14167C>T	154. >=95% vs <5%, P vs E, m.14167C>T	0.0695542
155	>=95% vs <5%	P vs E	m.14798T>C	155. >=95% vs <5%, P vs E, m.14798T>C	0.254902
156	>=95% vs <5%	P vs E	m.16224T>C	156. >=95% vs <5%, P vs E, m.16224T>C	0.135002
157	>=95% vs <5%	P vs E	m.228G>A	157. >=95% vs <5%, P vs E, m.228G>A	0.564895
158	>=95% vs <5%	P vs E	m.1888G>A	158. >=95% vs <5%, P vs E, m.1888G>A	0.187995
159	>=95% vs <5%	P vs E	m.4216T>C	159. >=95% vs <5%, P vs E, m.4216T>C	0.621809
160	>=95% vs <5%	P vs E	m.4917A>G	160. >=95% vs <5%, P vs E, m.4917A>G	0.187995
161	>=95% vs <5%	P vs E	m.5147G>A	161. >=95% vs <5%, P vs E, m.5147G>A	0.135002
162	>=95% vs <5%	P vs E	m.8697G>A	162. >=95% vs <5%, P vs E, m.8697G>A	0.187995
163	>=95% vs <5%	P vs E	m.10463T>C	163. >=95% vs <5%, P vs E, m.10463T>C	0.10392
164	>=95% vs <5%	P vs E	m.11251A>G	164. >=95% vs <5%, P vs E, m.11251A>G	0.621809
165	>=95% vs <5%	P vs E	m.13368G>A	165. >=95% vs <5%, P vs E, m.13368G>A	0.187995
166	>=95% vs <5%	P vs E	m.14905G>A	166. >=95% vs <5%, P vs E, m.14905G>A	0.187995
167	>=95% vs <5%	P vs E	m.15452C>A	167. >=95% vs <5%, P vs E, m.15452C>A	0.621809
168	>=95% vs <5%	P vs E	m.15607A>G	168. >=95% vs <5%, P vs E, m.15607A>G	0.187995
169	>=95% vs <5%	P vs E	m.15928G>A	169. >=95% vs <5%, P vs E, m.15928G>A	0.187995
170	>=95% vs <5%	P vs E	m.16126T>C	170. >=95% vs <5%, P vs E, m.16126T>C	0.621809
171	>=95% vs <5%	P vs E	m.16294C>T	171. >=95% vs <5%, P vs E, m.16294C>T	0.187995
172	>=95% vs <5%	P vs E	m.16304T>C	172. >=95% vs <5%, P vs E, m.16304T>C	0.132466
173	>=95% vs <5%	P vs E	m.16093T>C	173. >=95% vs <5%, P vs E, m.16093T>C	0.75169
174	>=95% vs <5%	P vs E	m.489T>C	174. >=95% vs <5%, P vs E, m.489T>C	0.617615
175	>=95% vs <5%	P vs E	m.16129G>A	175. >=95% vs <5%, P vs E, m.16129G>A	0.564895
176	>=95% vs <5%	P vs E	m.16298T>C	176. >=95% vs <5%, P vs E, m.16298T>C	0.374722
177	>=95% vs <5%	P vs E	m.72T>C	177. >=95% vs <5%, P vs E, m.72T>C	0.331397
178	>=95% vs <5%	P vs E	m.4580G>A	178. >=95% vs <5%, P vs E, m.4580G>A	0.135002
179	>=95% vs <5%	P vs E	m.15904C>T	179. >=95% vs <5%, P vs E, m.15904C>T	0.135002
180	>=95% vs <5%	P vs E	m.456C>T	180. >=95% vs <5%, P vs E, m.456C>T	0.206742
181	>=95% vs <5%	P vs E	m.15924A>G	181. >=95% vs <5%, P vs E, m.15924A>G	0.564895
182	>=95% vs <5%	P vs E	m.150C>T	182. >=95% vs <5%, P vs E, m.150C>T	0.610638
183	>=95% vs <5%	P vs E	m.3197T>C	183. >=95% vs <5%, P vs E, m.3197T>C	0.617615
184	>=95% vs <5%	P vs E	m.9477G>A	184. >=95% vs <5%, P vs E, m.9477G>A	0.617615
185	>=95% vs <5%	P vs E	m.13617T>C	185. >=95% vs <5%, P vs E, m.13617T>C	0.617615
186	>=95% vs <5%	P vs E	m.14182T>C	186. >=95% vs <5%, P vs E, m.14182T>C	0.135002
187	>=95% vs <5%	P vs E	m.16270C>T	187. >=95% vs <5%, P vs E, m.16270C>T	0.617615
188	>=95% vs <5%	P vs E	m.14793A>G	188. >=95% vs <5%, P vs E, m.14793A>G	0.11895
189	>=95% vs <5%	P vs E	m.16256C>T	189. >=95% vs <5%, P vs E, m.16256C>T	0.0681349
190	>=95% vs <5%	P vs E	m.185G>A	190. >=95% vs <5%, P vs E, m.185G>A	0.898305
191	>=95% vs <5%	P vs E	m.295C>T	191. >=95% vs <5%, P vs E, m.295C>T	0.555667
192	>=95% vs <5%	P vs E	m.462C>T	192. >=95% vs <5%, P vs E, m.462C>T	0.799658
193	>=95% vs <5%	P vs E	m.12612A>G	193. >=95% vs <5%, P vs E, m.12612A>G	0.848576
194	>=95% vs <5%	P vs E	m.16069C>T	194. >=95% vs <5%, P vs E, m.16069C>T	0.555667
195	>=95% vs <5%	P vs E	m.522_523del	195. >=95% vs <5%, P vs E, m.522_523del	0.696058
196	>=95% vs <5%	P vs E	m.15218A>G	196. >=95% vs <5%, P vs E, m.15218A>G	0.206742
197	>=95% vs <5%	P vs E	m.16291C>T	197. >=95% vs <5%, P vs E, m.16291C>T	0.917746
198	>=95% vs <5%	P vs E	m.16399A>G	198. >=95% vs <5%, P vs E, m.16399A>G	0.799658
199	>=95% vs <5%	P vs E	m.16051A>G	199. >=95% vs <5%, P vs E, m.16051A>G	0.898305
200	>=95% vs <5%	E vs C	m.73A>G	200. >=95% vs <5%, E vs C, m.73A>G	0.346164
201	>=95% vs <5%	E vs C	m.194C>T	201. >=95% vs <5%, E vs C, m.194C>T	0.113138
202	>=95% vs <5%	E vs C	m.195T>C	202. >=95% vs <5%, E vs C, m.195T>C	0.951238
203	>=95% vs <5%	E vs C	m.204T>C	203. >=95% vs <5%, E vs C, m.204T>C	0.385027
204	>=95% vs <5%	E vs C	m.207G>A	204. >=95% vs <5%, E vs C, m.207G>A	0.635394
205	>=95% vs <5%	E vs C	m.709G>A	205. >=95% vs <5%, E vs C, m.709G>A	0.812317
206	>=95% vs <5%	E vs C	m.1438A>G	206. >=95% vs <5%, E vs C, m.1438A>G	0.394028
207	>=95% vs <5%	E vs C	m.2706A>G	207. >=95% vs <5%, E vs C, m.2706A>G	0.792322
208	>=95% vs <5%	E vs C	m.4769A>G	208. >=95% vs <5%, E vs C, m.4769A>G	0.394028
209	>=95% vs <5%	E vs C	m.5460G>A	209. >=95% vs <5%, E vs C, m.5460G>A	0.635394
210	>=95% vs <5%	E vs C	m.7028C>T	210. >=95% vs <5%, E vs C, m.7028C>T	0.792322
211	>=95% vs <5%	E vs C	m.8251G>A	211. >=95% vs <5%, E vs C, m.8251G>A	0.49125
212	>=95% vs <5%	E vs C	m.8994G>A	212. >=95% vs <5%, E vs C, m.8994G>A	0.113138
213	>=95% vs <5%	E vs C	m.11719G>A	213. >=95% vs <5%, E vs C, m.11719G>A	0.377787
214	>=95% vs <5%	E vs C	m.11947A>G	214. >=95% vs <5%, E vs C, m.11947A>G	0.113138
215	>=95% vs <5%	E vs C	m.12414T>C	215. >=95% vs <5%, E vs C, m.12414T>C	0.113138
216	>=95% vs <5%	E vs C	m.12705C>T	216. >=95% vs <5%, E vs C, m.12705C>T	0.164211
217	>=95% vs <5%	E vs C	m.14766C>T	217. >=95% vs <5%, E vs C, m.14766C>T	0.262253
218	>=95% vs <5%	E vs C	m.16223C>T	218. >=95% vs <5%, E vs C, m.16223C>T	0.123222
219	>=95% vs <5%	E vs C	m.16519T>C	219. >=95% vs <5%, E vs C, m.16519T>C	0.964504
220	>=95% vs <5%	E vs C	m.477T>C	220. >=95% vs <5%, E vs C, m.477T>C	0.970439
221	>=95% vs <5%	E vs C	m.3010G>A	221. >=95% vs <5%, E vs C, m.3010G>A	0.355756
222	>=95% vs <5%	E vs C	m.499G>A	222. >=95% vs <5%, E vs C, m.499G>A	0.635394
223	>=95% vs <5%	E vs C	m.1811A>G	223. >=95% vs <5%, E vs C, m.1811A>G	0.810956
224	>=95% vs <5%	E vs C	m.4646T>C	224. >=95% vs <5%, E vs C, m.4646T>C	0.635394
225	>=95% vs <5%	E vs C	m.5999T>C	225. >=95% vs <5%, E vs C, m.5999T>C	0.635394
226	>=95% vs <5%	E vs C	m.6047A>G	226. >=95% vs <5%, E vs C, m.6047A>G	0.635394
227	>=95% vs <5%	E vs C	m.11332C>T	227. >=95% vs <5%, E vs C, m.11332C>T	0.635394
228	>=95% vs <5%	E vs C	m.11467A>G	228. >=95% vs <5%, E vs C, m.11467A>G	0.705584
229	>=95% vs <5%	E vs C	m.12308A>G	229. >=95% vs <5%, E vs C, m.12308A>G	0.922803
230	>=95% vs <5%	E vs C	m.12372G>A	230. >=95% vs <5%, E vs C, m.12372G>A	0.705584
231	>=95% vs <5%	E vs C	m.13708G>A	231. >=95% vs <5%, E vs C, m.13708G>A	0.393685
232	>=95% vs <5%	E vs C	m.14620C>T	232. >=95% vs <5%, E vs C, m.14620C>T	0.635394
233	>=95% vs <5%	E vs C	m.15693T>C	233. >=95% vs <5%, E vs C, m.15693T>C	0.635394
234	>=95% vs <5%	E vs C	m.16356T>C	234. >=95% vs <5%, E vs C, m.16356T>C	0.963399
235	>=95% vs <5%	E vs C	m.522_523dup	235. >=95% vs <5%, E vs C, m.522_523dup	0.443423
236	>=95% vs <5%	E vs C	m.152T>C	236. >=95% vs <5%, E vs C, m.152T>C	0.23695
237	>=95% vs <5%	E vs C	m.16311T>C	237. >=95% vs <5%, E vs C, m.16311T>C	0.485136
238	>=95% vs <5%	E vs C	m.16362T>C	238. >=95% vs <5%, E vs C, m.16362T>C	0.287309
239	>=95% vs <5%	E vs C	m.8818C>T	239. >=95% vs <5%, E vs C, m.8818C>T	0.539564
240	>=95% vs <5%	E vs C	m.146T>C	240. >=95% vs <5%, E vs C, m.146T>C	0.853627
241	>=95% vs <5%	E vs C	m.1189T>C	241. >=95% vs <5%, E vs C, m.1189T>C	0.606808
242	>=95% vs <5%	E vs C	m.3480A>G	242. >=95% vs <5%, E vs C, m.3480A>G	0.34556
243	>=95% vs <5%	E vs C	m.9055G>A	243. >=95% vs <5%, E vs C, m.9055G>A	0.638766
244	>=95% vs <5%	E vs C	m.9698T>C	244. >=95% vs <5%, E vs C, m.9698T>C	0.486043
245	>=95% vs <5%	E vs C	m.10398A>G	245. >=95% vs <5%, E vs C, m.10398A>G	0.711411
246	>=95% vs <5%	E vs C	m.10550A>G	246. >=95% vs <5%, E vs C, m.10550A>G	0.606808
247	>=95% vs <5%	E vs C	m.11299T>C	247. >=95% vs <5%, E vs C, m.11299T>C	0.606808
248	>=95% vs <5%	E vs C	m.14167C>T	248. >=95% vs <5%, E vs C, m.14167C>T	0.34556
249	>=95% vs <5%	E vs C	m.14798T>C	249. >=95% vs <5%, E vs C, m.14798T>C	0.94146
250	>=95% vs <5%	E vs C	m.16224T>C	250. >=95% vs <5%, E vs C, m.16224T>C	0.606808
251	>=95% vs <5%	E vs C	m.228G>A	251. >=95% vs <5%, E vs C, m.228G>A	0.975462
252	>=95% vs <5%	E vs C	m.930G>A	252. >=95% vs <5%, E vs C, m.930G>A	0.555563
253	>=95% vs <5%	E vs C	m.1888G>A	253. >=95% vs <5%, E vs C, m.1888G>A	0.762525
254	>=95% vs <5%	E vs C	m.4216T>C	254. >=95% vs <5%, E vs C, m.4216T>C	0.433001
255	>=95% vs <5%	E vs C	m.4917A>G	255. >=95% vs <5%, E vs C, m.4917A>G	0.762525
256	>=95% vs <5%	E vs C	m.5147G>A	256. >=95% vs <5%, E vs C, m.5147G>A	0.880187
257	>=95% vs <5%	E vs C	m.8697G>A	257. >=95% vs <5%, E vs C, m.8697G>A	0.762525
258	>=95% vs <5%	E vs C	m.10463T>C	258. >=95% vs <5%, E vs C, m.10463T>C	0.915774
259	>=95% vs <5%	E vs C	m.11251A>G	259. >=95% vs <5%, E vs C, m.11251A>G	0.609053
260	>=95% vs <5%	E vs C	m.11812A>G	260. >=95% vs <5%, E vs C, m.11812A>G	0.34645
261	>=95% vs <5%	E vs C	m.13368G>A	261. >=95% vs <5%, E vs C, m.13368G>A	0.762525
262	>=95% vs <5%	E vs C	m.14233A>G	262. >=95% vs <5%, E vs C, m.14233A>G	0.34645
263	>=95% vs <5%	E vs C	m.14905G>A	263. >=95% vs <5%, E vs C, m.14905G>A	0.762525
264	>=95% vs <5%	E vs C	m.15452C>A	264. >=95% vs <5%, E vs C, m.15452C>A	0.609053
265	>=95% vs <5%	E vs C	m.15607A>G	265. >=95% vs <5%, E vs C, m.15607A>G	0.762525
266	>=95% vs <5%	E vs C	m.15928G>A	266. >=95% vs <5%, E vs C, m.15928G>A	0.762525
267	>=95% vs <5%	E vs C	m.16126T>C	267. >=95% vs <5%, E vs C, m.16126T>C	0.51611
268	>=95% vs <5%	E vs C	m.16294C>T	268. >=95% vs <5%, E vs C, m.16294C>T	0.528106
269	>=95% vs <5%	E vs C	m.16304T>C	269. >=95% vs <5%, E vs C, m.16304T>C	0.928929
270	>=95% vs <5%	E vs C	m.16093T>C	270. >=95% vs <5%, E vs C, m.16093T>C	0.949112
271	>=95% vs <5%	E vs C	m.489T>C	271. >=95% vs <5%, E vs C, m.489T>C	0.732648
272	>=95% vs <5%	E vs C	m.11914G>A	272. >=95% vs <5%, E vs C, m.11914G>A	0.554441
273	>=95% vs <5%	E vs C	m.15043G>A	273. >=95% vs <5%, E vs C, m.15043G>A	0.394028
274	>=95% vs <5%	E vs C	m.16129G>A	274. >=95% vs <5%, E vs C, m.16129G>A	0.853627
275	>=95% vs <5%	E vs C	m.16298T>C	275. >=95% vs <5%, E vs C, m.16298T>C	0.638766
276	>=95% vs <5%	E vs C	m.72T>C	276. >=95% vs <5%, E vs C, m.72T>C	0.606808
277	>=95% vs <5%	E vs C	m.4580G>A	277. >=95% vs <5%, E vs C, m.4580G>A	0.435333
278	>=95% vs <5%	E vs C	m.15904C>T	278. >=95% vs <5%, E vs C, m.15904C>T	0.606808
279	>=95% vs <5%	E vs C	m.199T>C	279. >=95% vs <5%, E vs C, m.199T>C	0.720869
280	>=95% vs <5%	E vs C	m.456C>T	280. >=95% vs <5%, E vs C, m.456C>T	0.154871
281	>=95% vs <5%	E vs C	m.1719G>A	281. >=95% vs <5%, E vs C, m.1719G>A	0.539564
282	>=95% vs <5%	E vs C	m.15924A>G	282. >=95% vs <5%, E vs C, m.15924A>G	0.554441
283	>=95% vs <5%	E vs C	m.520_523dup	283. >=95% vs <5%, E vs C, m.520_523dup	1
284	>=95% vs <5%	E vs C	m.150C>T	284. >=95% vs <5%, E vs C, m.150C>T	0.364571
285	>=95% vs <5%	E vs C	m.3197T>C	285. >=95% vs <5%, E vs C, m.3197T>C	0.606808
286	>=95% vs <5%	E vs C	m.7768A>G	286. >=95% vs <5%, E vs C, m.7768A>G	0.184156
287	>=95% vs <5%	E vs C	m.9477G>A	287. >=95% vs <5%, E vs C, m.9477G>A	0.606808
288	>=95% vs <5%	E vs C	m.13617T>C	288. >=95% vs <5%, E vs C, m.13617T>C	0.606808
289	>=95% vs <5%	E vs C	m.14182T>C	289. >=95% vs <5%, E vs C, m.14182T>C	0.0693943
290	>=95% vs <5%	E vs C	m.16270C>T	290. >=95% vs <5%, E vs C, m.16270C>T	0.444969
291	>=95% vs <5%	E vs C	m.14793A>G	291. >=95% vs <5%, E vs C, m.14793A>G	0.539564
292	>=95% vs <5%	E vs C	m.16256C>T	292. >=95% vs <5%, E vs C, m.16256C>T	0.394028
293	>=95% vs <5%	E vs C	m.4336T>C	293. >=95% vs <5%, E vs C, m.4336T>C	0.081556
294	>=95% vs <5%	E vs C	m.16296C>T	294. >=95% vs <5%, E vs C, m.16296C>T	0.841368
295	>=95% vs <5%	E vs C	m.185G>A	295. >=95% vs <5%, E vs C, m.185G>A	0.963399
296	>=95% vs <5%	E vs C	m.295C>T	296. >=95% vs <5%, E vs C, m.295C>T	0.692879
297	>=95% vs <5%	E vs C	m.462C>T	297. >=95% vs <5%, E vs C, m.462C>T	0.692879
298	>=95% vs <5%	E vs C	m.12612A>G	298. >=95% vs <5%, E vs C, m.12612A>G	0.957265
299	>=95% vs <5%	E vs C	m.16069C>T	299. >=95% vs <5%, E vs C, m.16069C>T	0.692879
300	>=95% vs <5%	E vs C	m.522_523del	300. >=95% vs <5%, E vs C, m.522_523del	0.917298
301	>=95% vs <5%	E vs C	m.188A>G	301. >=95% vs <5%, E vs C, m.188A>G	0.539564
302	>=95% vs <5%	E vs C	m.16291C>T	302. >=95% vs <5%, E vs C, m.16291C>T	0.184156
303	>=95% vs <5%	E vs C	m.16399A>G	303. >=95% vs <5%, E vs C, m.16399A>G	0.184156
304	>=95% vs <5%	E vs C	m.13934C>T	304. >=95% vs <5%, E vs C, m.13934C>T	0.720869
305	>=95% vs <5%	E vs C	m.497C>T	305. >=95% vs <5%, E vs C, m.497C>T	0.354212
306	>=95% vs <5%	E vs C	m.16051A>G	306. >=95% vs <5%, E vs C, m.16051A>G	0.184156
307	>=95% vs <5%	P vs C	m.73A>G	307. >=95% vs <5%, P vs C, m.73A>G	0.842622
308	>=95% vs <5%	P vs C	m.194C>T	308. >=95% vs <5%, P vs C, m.194C>T	0.0958375
309	>=95% vs <5%	P vs C	m.195T>C	309. >=95% vs <5%, P vs C, m.195T>C	0.400479
310	>=95% vs <5%	P vs C	m.204T>C	310. >=95% vs <5%, P vs C, m.204T>C	0.119278
311	>=95% vs <5%	P vs C	m.207G>A	311. >=95% vs <5%, P vs C, m.207G>A	0.0671458
312	>=95% vs <5%	P vs C	m.709G>A	312. >=95% vs <5%, P vs C, m.709G>A	0.0170237
313	>=95% vs <5%	P vs C	m.1438A>G	313. >=95% vs <5%, P vs C, m.1438A>G	0.338859
314	>=95% vs <5%	P vs C	m.2706A>G	314. >=95% vs <5%, P vs C, m.2706A>G	0.620381
315	>=95% vs <5%	P vs C	m.4769A>G	315. >=95% vs <5%, P vs C, m.4769A>G	0.0958375
316	>=95% vs <5%	P vs C	m.5460G>A	316. >=95% vs <5%, P vs C, m.5460G>A	0.91901
317	>=95% vs <5%	P vs C	m.7028C>T	317. >=95% vs <5%, P vs C, m.7028C>T	0.620381
318	>=95% vs <5%	P vs C	m.8251G>A	318. >=95% vs <5%, P vs C, m.8251G>A	0.171829
319	>=95% vs <5%	P vs C	m.8994G>A	319. >=95% vs <5%, P vs C, m.8994G>A	0.0958375
320	>=95% vs <5%	P vs C	m.11719G>A	320. >=95% vs <5%, P vs C, m.11719G>A	0.926195
321	>=95% vs <5%	P vs C	m.11947A>G	321. >=95% vs <5%, P vs C, m.11947A>G	0.0958375
322	>=95% vs <5%	P vs C	m.12414T>C	322. >=95% vs <5%, P vs C, m.12414T>C	0.0958375
323	>=95% vs <5%	P vs C	m.12705C>T	323. >=95% vs <5%, P vs C, m.12705C>T	0.122322
324	>=95% vs <5%	P vs C	m.14766C>T	324. >=95% vs <5%, P vs C, m.14766C>T	0.926195
325	>=95% vs <5%	P vs C	m.16223C>T	325. >=95% vs <5%, P vs C, m.16223C>T	0.379244
326	>=95% vs <5%	P vs C	m.16519T>C	326. >=95% vs <5%, P vs C, m.16519T>C	0.218961
327	>=95% vs <5%	P vs C	m.477T>C	327. >=95% vs <5%, P vs C, m.477T>C	0.93453
328	>=95% vs <5%	P vs C	m.3010G>A	328. >=95% vs <5%, P vs C, m.3010G>A	0.95616
329	>=95% vs <5%	P vs C	m.499G>A	329. >=95% vs <5%, P vs C, m.499G>A	0.0665955
330	>=95% vs <5%	P vs C	m.1811A>G	330. >=95% vs <5%, P vs C, m.1811A>G	0.155521
331	>=95% vs <5%	P vs C	m.4646T>C	331. >=95% vs <5%, P vs C, m.4646T>C	0.133579
332	>=95% vs <5%	P vs C	m.5999T>C	332. >=95% vs <5%, P vs C, m.5999T>C	0.133579
333	>=95% vs <5%	P vs C	m.6047A>G	333. >=95% vs <5%, P vs C, m.6047A>G	0.133579
334	>=95% vs <5%	P vs C	m.11332C>T	334. >=95% vs <5%, P vs C, m.11332C>T	0.133579
335	>=95% vs <5%	P vs C	m.11467A>G	335. >=95% vs <5%, P vs C, m.11467A>G	0.0710085
336	>=95% vs <5%	P vs C	m.12308A>G	336. >=95% vs <5%, P vs C, m.12308A>G	0.0710085
337	>=95% vs <5%	P vs C	m.12372G>A	337. >=95% vs <5%, P vs C, m.12372G>A	0.0710085
338	>=95% vs <5%	P vs C	m.13708G>A	338. >=95% vs <5%, P vs C, m.13708G>A	0.499021
339	>=95% vs <5%	P vs C	m.14620C>T	339. >=95% vs <5%, P vs C, m.14620C>T	0.133579
340	>=95% vs <5%	P vs C	m.15693T>C	340. >=95% vs <5%, P vs C, m.15693T>C	0.133579
341	>=95% vs <5%	P vs C	m.16356T>C	341. >=95% vs <5%, P vs C, m.16356T>C	0.72607
342	>=95% vs <5%	P vs C	m.522_523dup	342. >=95% vs <5%, P vs C, m.522_523dup	0.0728906
343	>=95% vs <5%	P vs C	m.152T>C	343. >=95% vs <5%, P vs C, m.152T>C	0.759042
344	>=95% vs <5%	P vs C	m.16311T>C	344. >=95% vs <5%, P vs C, m.16311T>C	0.626476
345	>=95% vs <5%	P vs C	m.239T>C	345. >=95% vs <5%, P vs C, m.239T>C	0.816681
346	>=95% vs <5%	P vs C	m.16362T>C	346. >=95% vs <5%, P vs C, m.16362T>C	0.743664
347	>=95% vs <5%	P vs C	m.8818C>T	347. >=95% vs <5%, P vs C, m.8818C>T	0.179849
348	>=95% vs <5%	P vs C	m.146T>C	348. >=95% vs <5%, P vs C, m.146T>C	0.171829
349	>=95% vs <5%	P vs C	m.1189T>C	349. >=95% vs <5%, P vs C, m.1189T>C	0.241172
350	>=95% vs <5%	P vs C	m.3480A>G	350. >=95% vs <5%, P vs C, m.3480A>G	0.241172
351	>=95% vs <5%	P vs C	m.9055G>A	351. >=95% vs <5%, P vs C, m.9055G>A	0.581348
352	>=95% vs <5%	P vs C	m.9698T>C	352. >=95% vs <5%, P vs C, m.9698T>C	0.410433
353	>=95% vs <5%	P vs C	m.10398A>G	353. >=95% vs <5%, P vs C, m.10398A>G	0.525518
354	>=95% vs <5%	P vs C	m.10550A>G	354. >=95% vs <5%, P vs C, m.10550A>G	0.241172
355	>=95% vs <5%	P vs C	m.11299T>C	355. >=95% vs <5%, P vs C, m.11299T>C	0.241172
356	>=95% vs <5%	P vs C	m.14167C>T	356. >=95% vs <5%, P vs C, m.14167C>T	0.241172
357	>=95% vs <5%	P vs C	m.14798T>C	357. >=95% vs <5%, P vs C, m.14798T>C	0.228819
358	>=95% vs <5%	P vs C	m.16224T>C	358. >=95% vs <5%, P vs C, m.16224T>C	0.241172
359	>=95% vs <5%	P vs C	m.228G>A	359. >=95% vs <5%, P vs C, m.228G>A	0.536972
360	>=95% vs <5%	P vs C	m.930G>A	360. >=95% vs <5%, P vs C, m.930G>A	0.0234494
361	>=95% vs <5%	P vs C	m.1888G>A	361. >=95% vs <5%, P vs C, m.1888G>A	0.0891352
362	>=95% vs <5%	P vs C	m.4216T>C	362. >=95% vs <5%, P vs C, m.4216T>C	0.175488
363	>=95% vs <5%	P vs C	m.4917A>G	363. >=95% vs <5%, P vs C, m.4917A>G	0.0891352
364	>=95% vs <5%	P vs C	m.5147G>A	364. >=95% vs <5%, P vs C, m.5147G>A	0.0872106
365	>=95% vs <5%	P vs C	m.8697G>A	365. >=95% vs <5%, P vs C, m.8697G>A	0.0891352
366	>=95% vs <5%	P vs C	m.10463T>C	366. >=95% vs <5%, P vs C, m.10463T>C	0.0646315
367	>=95% vs <5%	P vs C	m.11251A>G	367. >=95% vs <5%, P vs C, m.11251A>G	0.279669
368	>=95% vs <5%	P vs C	m.11812A>G	368. >=95% vs <5%, P vs C, m.11812A>G	0.0440637
369	>=95% vs <5%	P vs C	m.13368G>A	369. >=95% vs <5%, P vs C, m.13368G>A	0.0891352
370	>=95% vs <5%	P vs C	m.14233A>G	370. >=95% vs <5%, P vs C, m.14233A>G	0.0440637
371	>=95% vs <5%	P vs C	m.14905G>A	371. >=95% vs <5%, P vs C, m.14905G>A	0.0891352
372	>=95% vs <5%	P vs C	m.15452C>A	372. >=95% vs <5%, P vs C, m.15452C>A	0.279669
373	>=95% vs <5%	P vs C	m.15607A>G	373. >=95% vs <5%, P vs C, m.15607A>G	0.0891352
374	>=95% vs <5%	P vs C	m.15928G>A	374. >=95% vs <5%, P vs C, m.15928G>A	0.0891352
375	>=95% vs <5%	P vs C	m.16126T>C	375. >=95% vs <5%, P vs C, m.16126T>C	0.222652
376	>=95% vs <5%	P vs C	m.16294C>T	376. >=95% vs <5%, P vs C, m.16294C>T	0.0466374
377	>=95% vs <5%	P vs C	m.16304T>C	377. >=95% vs <5%, P vs C, m.16304T>C	0.0834905
378	>=95% vs <5%	P vs C	m.16093T>C	378. >=95% vs <5%, P vs C, m.16093T>C	0.652153
379	>=95% vs <5%	P vs C	m.249del	379. >=95% vs <5%, P vs C, m.249del	0.807695
380	>=95% vs <5%	P vs C	m.489T>C	380. >=95% vs <5%, P vs C, m.489T>C	0.817315
381	>=95% vs <5%	P vs C	m.9545A>G	381. >=95% vs <5%, P vs C, m.9545A>G	0.807695
382	>=95% vs <5%	P vs C	m.11914G>A	382. >=95% vs <5%, P vs C, m.11914G>A	0.477092
383	>=95% vs <5%	P vs C	m.15043G>A	383. >=95% vs <5%, P vs C, m.15043G>A	0.719
384	>=95% vs <5%	P vs C	m.16129G>A	384. >=95% vs <5%, P vs C, m.16129G>A	0.410433
385	>=95% vs <5%	P vs C	m.16298T>C	385. >=95% vs <5%, P vs C, m.16298T>C	0.581348
386	>=95% vs <5%	P vs C	m.72T>C	386. >=95% vs <5%, P vs C, m.72T>C	0.54594
387	>=95% vs <5%	P vs C	m.4580G>A	387. >=95% vs <5%, P vs C, m.4580G>A	0.338859
388	>=95% vs <5%	P vs C	m.15904C>T	388. >=95% vs <5%, P vs C, m.15904C>T	0.241172
389	>=95% vs <5%	P vs C	m.456C>T	389. >=95% vs <5%, P vs C, m.456C>T	0.905521
390	>=95% vs <5%	P vs C	m.1719G>A	390. >=95% vs <5%, P vs C, m.1719G>A	0.93453
391	>=95% vs <5%	P vs C	m.15924A>G	391. >=95% vs <5%, P vs C, m.15924A>G	0.93453
392	>=95% vs <5%	P vs C	m.520_523dup	392. >=95% vs <5%, P vs C, m.520_523dup	1
393	>=95% vs <5%	P vs C	m.150C>T	393. >=95% vs <5%, P vs C, m.150C>T	0.751308
394	>=95% vs <5%	P vs C	m.3197T>C	394. >=95% vs <5%, P vs C, m.3197T>C	0.252414
395	>=95% vs <5%	P vs C	m.9477G>A	395. >=95% vs <5%, P vs C, m.9477G>A	0.252414
396	>=95% vs <5%	P vs C	m.13617T>C	396. >=95% vs <5%, P vs C, m.13617T>C	0.252414
397	>=95% vs <5%	P vs C	m.16270C>T	397. >=95% vs <5%, P vs C, m.16270C>T	0.161035
398	>=95% vs <5%	P vs C	m.14793A>G	398. >=95% vs <5%, P vs C, m.14793A>G	0.179849
399	>=95% vs <5%	P vs C	m.16256C>T	399. >=95% vs <5%, P vs C, m.16256C>T	0.155477
400	>=95% vs <5%	P vs C	m.4336T>C	400. >=95% vs <5%, P vs C, m.4336T>C	0.91901
401	>=95% vs <5%	P vs C	m.16296C>T	401. >=95% vs <5%, P vs C, m.16296C>T	0.0460462
402	>=95% vs <5%	P vs C	m.185G>A	402. >=95% vs <5%, P vs C, m.185G>A	0.91901
403	>=95% vs <5%	P vs C	m.295C>T	403. >=95% vs <5%, P vs C, m.295C>T	0.777911
404	>=95% vs <5%	P vs C	m.462C>T	404. >=95% vs <5%, P vs C, m.462C>T	0.905521
405	>=95% vs <5%	P vs C	m.12612A>G	405. >=95% vs <5%, P vs C, m.12612A>G	0.777911
406	>=95% vs <5%	P vs C	m.16069C>T	406. >=95% vs <5%, P vs C, m.16069C>T	0.777911
407	>=95% vs <5%	P vs C	m.522_523del	407. >=95% vs <5%, P vs C, m.522_523del	0.72188
408	>=95% vs <5%	P vs C	m.188A>G	408. >=95% vs <5%, P vs C, m.188A>G	0.477092
409	>=95% vs <5%	P vs C	m.15218A>G	409. >=95% vs <5%, P vs C, m.15218A>G	0.095633
410	>=95% vs <5%	P vs C	m.16291C>T	410. >=95% vs <5%, P vs C, m.16291C>T	0.221498
411	>=95% vs <5%	P vs C	m.16399A>G	411. >=95% vs <5%, P vs C, m.16399A>G	0.095633
412	>=95% vs <5%	P vs C	m.15833C>T	412. >=95% vs <5%, P vs C, m.15833C>T	0.93453
413	>=95% vs <5%	P vs C	m.16051A>G	413. >=95% vs <5%, P vs C, m.16051A>G	0.230999
414	5-95% vs (<5%+>=95%)	P+E vs C	m.522_523dup	414. 5-95% vs (<5%+>=95%), P+E vs C, m.522_523dup	0.973574
415	5-95% vs (<5%+>=95%)	P+E vs C	m.16093T>C	415. 5-95% vs (<5%+>=95%), P+E vs C, m.16093T>C	0.667241
416	5-95% vs (<5%+>=95%)	P+E vs C	m.520_523dup	416. 5-95% vs (<5%+>=95%), P+E vs C, m.520_523dup	0.976489
417	5-95% vs (<5%+>=95%)	P vs E	m.522_523dup	417. 5-95% vs (<5%+>=95%), P vs E, m.522_523dup	0.731226
418	5-95% vs (<5%+>=95%)	E vs C	m.522_523dup	418. 5-95% vs (<5%+>=95%), E vs C, m.522_523dup	0.813976
419	5-95% vs (<5%+>=95%)	E vs C	m.520_523dup	419. 5-95% vs (<5%+>=95%), E vs C, m.520_523dup	0.539564
420	5-95% vs (<5%+>=95%)	P vs C	m.522_523dup	420. 5-95% vs (<5%+>=95%), P vs C, m.522_523dup	0.873953
421	5-95% vs (<5%+>=95%)	P vs C	m.520_523dup	421. 5-95% vs (<5%+>=95%), P vs C, m.520_523dup	0.65093
422	Variant dose	P+E vs C	m.73A>G	422. Variant dose, P+E vs C, m.73A>G	0.870741
423	Variant dose	P+E vs C	m.195T>C	423. Variant dose, P+E vs C, m.195T>C	0.49522
424	Variant dose	P+E vs C	m.204T>C	424. Variant dose, P+E vs C, m.204T>C	0.129745
425	Variant dose	P+E vs C	m.16519T>C	425. Variant dose, P+E vs C, m.16519T>C	0.862092
426	Variant dose	P+E vs C	m.522_523dup	426. Variant dose, P+E vs C, m.522_523dup	0.20524
427	Variant dose	P+E vs C	m.152T>C	427. Variant dose, P+E vs C, m.152T>C	0.406741
428	Variant dose	P+E vs C	m.16311T>C	428. Variant dose, P+E vs C, m.16311T>C	0.359602
429	Variant dose	P+E vs C	m.239T>C	429. Variant dose, P+E vs C, m.239T>C	0.393991
430	Variant dose	P+E vs C	m.228G>A	430. Variant dose, P+E vs C, m.228G>A	0.558612
431	Variant dose	P+E vs C	m.16093T>C	431. Variant dose, P+E vs C, m.16093T>C	0.611677
432	Variant dose	P+E vs C	m.520_523dup	432. Variant dose, P+E vs C, m.520_523dup	0.976556
433	Variant dose	P+E vs C	m.150C>T	433. Variant dose, P+E vs C, m.150C>T	0.723774
434	Variant dose	P+E vs C	m.16270C>T	434. Variant dose, P+E vs C, m.16270C>T	0.303468
435	Variant dose	P+E vs C	m.16296C>T	435. Variant dose, P+E vs C, m.16296C>T	0.109452
436	Variant dose	P+E vs C	m.522_523del	436. Variant dose, P+E vs C, m.522_523del	0.867134
437	Variant dose	P+E vs C	m.16291C>T	437. Variant dose, P+E vs C, m.16291C>T	0.0976673
438	Variant dose	P vs E	m.204T>C	438. Variant dose, P vs E, m.204T>C	0.267379
439	Variant dose	P vs E	m.522_523dup	439. Variant dose, P vs E, m.522_523dup	0.381749
440	Variant dose	P vs E	m.16311T>C	440. Variant dose, P vs E, m.16311T>C	0.959338
441	Variant dose	P vs E	m.16093T>C	441. Variant dose, P vs E, m.16093T>C	0.905587
442	Variant dose	P vs E	m.520_523dup	442. Variant dose, P vs E, m.520_523dup	0.36614
443	Variant dose	P vs E	m.522_523del	443. Variant dose, P vs E, m.522_523del	0.909701
444	Variant dose	P vs E	m.16291C>T	444. Variant dose, P vs E, m.16291C>T	0.813033
445	Variant dose	E vs C	m.73A>G	445. Variant dose, E vs C, m.73A>G	0.686011
446	Variant dose	E vs C	m.195T>C	446. Variant dose, E vs C, m.195T>C	0.997636
447	Variant dose	E vs C	m.204T>C	447. Variant dose, E vs C, m.204T>C	0.513547
448	Variant dose	E vs C	m.16519T>C	448. Variant dose, E vs C, m.16519T>C	0.400101
449	Variant dose	E vs C	m.522_523dup	449. Variant dose, E vs C, m.522_523dup	0.633823
450	Variant dose	E vs C	m.152T>C	450. Variant dose, E vs C, m.152T>C	0.272994
451	Variant dose	E vs C	m.16311T>C	451. Variant dose, E vs C, m.16311T>C	0.464231
452	Variant dose	E vs C	m.239T>C	452. Variant dose, E vs C, m.239T>C	0.159477
453	Variant dose	E vs C	m.228G>A	453. Variant dose, E vs C, m.228G>A	0.873257
454	Variant dose	E vs C	m.16093T>C	454. Variant dose, E vs C, m.16093T>C	0.62881
455	Variant dose	E vs C	m.520_523dup	455. Variant dose, E vs C, m.520_523dup	0.541056
456	Variant dose	E vs C	m.150C>T	456. Variant dose, E vs C, m.150C>T	0.528734
457	Variant dose	E vs C	m.16270C>T	457. Variant dose, E vs C, m.16270C>T	0.594904
458	Variant dose	E vs C	m.16296C>T	458. Variant dose, E vs C, m.16296C>T	0.673814
459	Variant dose	E vs C	m.522_523del	459. Variant dose, E vs C, m.522_523del	0.946786
460	Variant dose	P vs C	m.73A>G	460. Variant dose, P vs C, m.73A>G	0.527754
461	Variant dose	P vs C	m.195T>C	461. Variant dose, P vs C, m.195T>C	0.283753
462	Variant dose	P vs C	m.204T>C	462. Variant dose, P vs C, m.204T>C	0.0876773
463	Variant dose	P vs C	m.16519T>C	463. Variant dose, P vs C, m.16519T>C	0.285735
464	Variant dose	P vs C	m.522_523dup	464. Variant dose, P vs C, m.522_523dup	0.113441
465	Variant dose	P vs C	m.152T>C	465. Variant dose, P vs C, m.152T>C	0.771492
466	Variant dose	P vs C	m.16311T>C	466. Variant dose, P vs C, m.16311T>C	0.431708
467	Variant dose	P vs C	m.239T>C	467. Variant dose, P vs C, m.239T>C	0.934768
468	Variant dose	P vs C	m.228G>A	468. Variant dose, P vs C, m.228G>A	0.440343
469	Variant dose	P vs C	m.16093T>C	469. Variant dose, P vs C, m.16093T>C	0.713421
470	Variant dose	P vs C	m.520_523dup	470. Variant dose, P vs C, m.520_523dup	0.652149
471	Variant dose	P vs C	m.150C>T	471. Variant dose, P vs C, m.150C>T	0.966341
472	Variant dose	P vs C	m.16270C>T	472. Variant dose, P vs C, m.16270C>T	0.240761
473	Variant dose	P vs C	m.16296C>T	473. Variant dose, P vs C, m.16296C>T	0.0339536
474	Variant dose	P vs C	m.522_523del	474. Variant dose, P vs C, m.522_523del	0.83935
475	Variant dose	P vs C	m.16291C>T	475. Variant dose, P vs C, m.16291C>T	0.0992192

## Sheet: FDR Tests
Multiple comparisons using False Discovery Rates (FDRs)												Set maximum acceptable FDR:	0.05
2-COLUMN INPUT AREA			OUTPUT AREA						Classical one-stage method*				Two-stage sharpened method†					Graphically sharpened method‡
									FDR-derived		FDR-adjusted		Stage 1	Stage 2		FDR-adjusted		Point		FDR-derived		FDR-adjusted
Hypothesis			Unique			Ascending	Hypothesis		significance		p-values		significance	significance		p-values		estimates of	Best	significance		p-values
name	p-values		rank		Order	p-values	name		thresholds		a.k.a. q-values		thresholds	thresholds		a.k.a. q-values		no. of H0s	estimate	thresholds		a.k.a. q-values
m.73A>G	0.495942	>95% vs <5%	79		1	0.0221154	m.12414T>C		0.000367647		0.751924		0.00035014	0.00035014		0.789521		136		0.000367647		0.751924
m.194C>T	0.0221154	>95% vs <5%	4		2	0.0221154	m.11947A>G		0.000735294		0.751924		0.00070028	0.00070028		0.789521		136		0.000735294		0.751924
m.195T>C	0.569105	>95% vs <5%	87		3	0.0221154	m.8994G>A		0.00110294		0.751924		0.00105042	0.00105042		0.789521		136		0.00110294		0.751924
m.204T>C	0.112401	>95% vs <5%	14		4	0.0221154	m.194C>T		0.00147059		0.751924		0.00140056	0.00140056		0.789521		136		0.00147059		0.751924
m.207G>A	0.140607	>95% vs <5%	19		5	0.0546034	m.14233A>G		0.00183824		0.792811		0.0017507	0.0017507		0.832451		136		0.00183824		0.792811
m.709G>A	0.199446	>95% vs <5%	27		6	0.0546034	m.11812A>G		0.00220588		0.792811		0.00210084	0.00210084		0.832451		136		0.00220588		0.792811
m.1438A>G	0.237105	>95% vs <5%	39		7	0.0546034	m.12705C>T		0.00257353		0.792811		0.00245098	0.00245098		0.832451		136		0.00257353		0.792811
m.2706A>G	0.640077	>95% vs <5%	95		8	0.0681194	m.930G>A		0.00294118		0.792811		0.00280112	0.00280112		0.832451		136		0.00294118		0.792811
m.4769A>G	0.0921719	>95% vs <5%	9		9	0.0921719	m.4769A>G		0.00330882		0.792811		0.00315126	0.00315126		0.832451		136		0.00330882		0.792811
m.5460G>A	0.729945	>95% vs <5%	108		10	0.0939246	m.16399A>G		0.00367647		0.792811		0.0035014	0.0035014		0.832451		136		0.00367647		0.792811
m.7028C>T	0.640077	>95% vs <5%	94		11	0.0956826	m.16294C>T		0.00404412		0.792811		0.00385154	0.00385154		0.832451		136		0.00404412		0.792811
m.8251G>A	0.182971	>95% vs <5%	26		12	0.0976673	m.16291C>T		0.00441176		0.792811		0.00420168	0.00420168		0.832451		136		0.00441176		0.792811
m.8994G>A	0.0221154	>95% vs <5%	3		13	0.109452	m.16296C>T		0.00477941		0.792811		0.00455182	0.00455182		0.832451		136		0.00477941		0.792811
m.11719G>A	0.56225	>95% vs <5%	86		14	0.112401	m.204T>C		0.00514706		0.792811		0.00490196	0.00490196		0.832451		136		0.00514706		0.792811
m.11947A>G	0.0221154	>95% vs <5%	2		15	0.126139	m.16223C>T		0.00551471		0.792811		0.0052521	0.0052521		0.832451		136		0.00551471		0.792811
m.12414T>C	0.0221154	>95% vs <5%	1		16	0.127484	m.522_523dup		0.00588235		0.792811		0.00560224	0.00560224		0.832451		136		0.00588235		0.792811
m.12705C>T	0.0546034	>95% vs <5%	7		17	0.127484	m.522_523dup		0.00625		0.792811		0.00595238	0.00595238		0.832451		136		0.00625		0.792811
m.14766C>T	0.47106	>95% vs <5%	75		18	0.129745	m.204T>C		0.00661765		0.792811		0.00630252	0.00630252		0.832451		136		0.00661765		0.792811
m.16223C>T	0.126139	>95% vs <5%	15		19	0.140607	m.207G>A		0.00698529		0.792811		0.00665266	0.00665266		0.832451		136		0.00698529		0.792811
m.16234C>T	0.667241	>95% vs <5%	98		20	0.152902	m.16291C>T		0.00735294		0.792811		0.0070028	0.0070028		0.832451		136		0.00735294		0.792811
m.16519T>C	0.421272	>95% vs <5%	64		21	0.157188	m.16051A>G		0.00772059		0.792811		0.00735294	0.00735294		0.832451		136		0.00772059		0.792811
m.477T>C	0.976489	>95% vs <5%	131		22	0.173697	m.12372G>A		0.00808824		0.792811		0.00770308	0.00770308		0.832451		136		0.00808824		0.792811
m.3010G>A	0.559836	>95% vs <5%	85		23	0.173697	m.11467A>G		0.00845588		0.792811		0.00805322	0.00805322		0.832451		136		0.00845588		0.792811
m.499G>A	0.316847	>95% vs <5%	51		24	0.177416	m.16296C>T		0.00882353		0.792811		0.00840336	0.00840336		0.832451		136		0.00882353		0.792811
m.1811A>G	0.298764	>95% vs <5%	46		25	0.178084	m.4216T>C		0.00919118		0.792811		0.0087535	0.0087535		0.832451		136		0.00919118		0.792811
m.4646T>C	0.44429	>95% vs <5%	72		26	0.182971	m.8251G>A		0.00955882		0.792811		0.00910364	0.00910364		0.832451		135.858		0.00955882		0.792811
m.5999T>C	0.44429	>95% vs <5%	71		27	0.199446	m.709G>A		0.00992647		0.792811		0.00945378	0.00945378		0.832451		136	True	0.00992647		0.792811
m.6047A>G	0.44429	>95% vs <5%	70		28	0.199897	m.16270C>T		0.0102941		0.792811		0.00980392	0.00980392		0.832451		136		0.0102941		0.792811
m.11332C>T	0.44429	>95% vs <5%	69		29	0.20524	m.522_523dup		0.0106618		0.792811		0.0101541	0.0101541		0.832451		135.89		0.0106618		0.792811
m.11467A>G	0.173697	>95% vs <5%	23		30	0.209862	m.15928G>A		0.0110294		0.792811		0.0105042	0.0105042		0.832451		135.419		0.0110294		0.792811
m.12308A>G	0.226849	>95% vs <5%	37		31	0.209862	m.15607A>G		0.0113971		0.792811		0.0108543	0.0108543		0.832451		134.154		0.0113971		0.792811
m.12372G>A	0.173697	>95% vs <5%	22		32	0.209862	m.14905G>A		0.0117647		0.792811		0.0112045	0.0112045		0.832451		132.888		0.0117647		0.792811
m.13708G>A	0.339093	>95% vs <5%	55		33	0.209862	m.13368G>A		0.0121324		0.792811		0.0115546	0.0115546		0.832451		131.623		0.0121324		0.792811
m.14620C>T	0.44429	>95% vs <5%	68		34	0.209862	m.8697G>A		0.0125		0.792811		0.0119048	0.0119048		0.832451		130.357		0.0125		0.792811
m.15693T>C	0.44429	>95% vs <5%	67		35	0.209862	m.4917A>G		0.0128676		0.792811		0.0122549	0.0122549		0.832451		129.091		0.0128676		0.792811
m.16356T>C	0.803384	>95% vs <5%	113		36	0.209862	m.1888G>A		0.0132353		0.792811		0.012605	0.012605		0.832451		127.826		0.0132353		0.792811
m.522_523dup	0.127484	>95% vs <5%	17		37	0.226849	m.12308A>G		0.0136029		0.80508		0.0129552	0.0129552		0.845334		129.341		0.0136029		0.80508
m.152T>C	0.375655	>95% vs <5%	58		38	0.228493	m.10463T>C		0.0139706		0.80508		0.0133053	0.0133053		0.845334		128.32		0.0139706		0.80508
m.16311T>C	0.477693	>95% vs <5%	76		39	0.237105	m.1438A>G		0.0143382		0.80508		0.0136555	0.0136555		0.845334		128.458		0.0143382		0.80508
m.239T>C	0.625572	>95% vs <5%	90		40	0.240146	m.16126T>C		0.0147059		0.80508		0.0140056	0.0140056		0.845334		127.656		0.0147059		0.80508
m.16362T>C	0.39687	>95% vs <5%	62		41	0.250522	m.5147G>A		0.0150735		0.80508		0.0143557	0.0143557		0.845334		128.089		0.0150735		0.80508
m.8818C>T	0.537801	>95% vs <5%	83		42	0.25963	m.15218A>G		0.0154412		0.80508		0.0147059	0.0147059		0.845334		128.314		0.0154412		0.80508
m.146T>C	0.334083	>95% vs <5%	54		43	0.25963	m.14182T>C		0.0158088		0.80508		0.015056	0.015056		0.845334		126.964		0.0158088		0.80508
m.1189T>C	0.729945	>95% vs <5%	107		44	0.260467	m.16304T>C		0.0161765		0.80508		0.0154062	0.0154062		0.845334		125.755		0.0161765		0.80508
m.3480A>G	0.970896	>95% vs <5%	128		45	0.291345	m.4336T>C		0.0165441		0.815269		0.0157563	0.0157563		0.856032		129.823		0.0165441		0.815269
m.9055G>A	0.966025	>95% vs <5%	123		46	0.298764	m.1811A>G		0.0169118		0.815269		0.0161064	0.0161064		0.856032		129.771		0.0169118		0.815269
m.9698T>C	0.968393	>95% vs <5%	124		47	0.303468	m.16270C>T		0.0172794		0.815269		0.0164566	0.0164566		0.856032		129.212		0.0172794		0.815269
m.10398A>G	0.531221	>95% vs <5%	81		48	0.316847	m.13617T>C		0.0176471		0.815269		0.0168067	0.0168067		0.856032		130.278		0.0176471		0.815269
m.10550A>G	0.729945	>95% vs <5%	106		49	0.316847	m.9477G>A		0.0180147		0.815269		0.0171569	0.0171569		0.856032		128.814		0.0180147		0.815269
m.11299T>C	0.729945	>95% vs <5%	105		50	0.316847	m.3197T>C		0.0183824		0.815269		0.017507	0.017507		0.856032		127.351		0.0183824		0.815269
m.14167C>T	0.970896	>95% vs <5%	127		51	0.316847	m.499G>A		0.01875		0.815269		0.0178571	0.0178571		0.856032		125.887		0.01875		0.815269
m.14798T>C	0.485788	>95% vs <5%	77		52	0.317715	m.15452C>A		0.0191176		0.815269		0.0182073	0.0182073		0.856032		124.581		0.0191176		0.815269
m.16224T>C	0.729945	>95% vs <5%	104		53	0.317715	m.11251A>G		0.0194853		0.815269		0.0185574	0.0185574		0.856032		123.116		0.0194853		0.815269
m.228G>A	0.716632	>95% vs <5%	100		54	0.334083	m.146T>C		0.0198529		0.838485		0.0189076	0.0189076		0.88041		124.64		0.0198529		0.838485
m.930G>A	0.0681194	>95% vs <5%	8		55	0.339093	m.13708G>A		0.0202206		0.838485		0.0192577	0.0192577		0.88041		124.072		0.0202206		0.838485
m.1888G>A	0.209862	>95% vs <5%	36		56	0.359602	m.16311T>C		0.0205882		0.839214		0.0196078	0.0196078		0.881175		126.484		0.0205882		0.839214
m.4216T>C	0.178084	>95% vs <5%	25		57	0.368536	m.456C>T		0.0209559		0.839214		0.019958	0.019958		0.881175		126.69		0.0209559		0.839214
m.4917A>G	0.209862	>95% vs <5%	35		58	0.375655	m.152T>C		0.0213235		0.839214		0.0203081	0.0203081		0.881175		126.533		0.0213235		0.839214
m.5147G>A	0.250522	>95% vs <5%	41		59	0.392707	m.15833C>T		0.0216912		0.839214		0.0206583	0.0206583		0.881175		128.439		0.0216912		0.839214
m.8697G>A	0.209862	>95% vs <5%	34		60	0.392707	m.188A>G		0.0220588		0.839214		0.0210084	0.0210084		0.881175		126.792		0.0220588		0.839214
m.10463T>C	0.228493	>95% vs <5%	38		61	0.393991	m.239T>C		0.0224265		0.839214		0.0213585	0.0213585		0.881175		125.411		0.0224265		0.839214
m.11251A>G	0.317715	>95% vs <5%	53		62	0.39687	m.16362T>C		0.0227941		0.839214		0.0217087	0.0217087		0.881175		124.351		0.0227941		0.839214
m.11812A>G	0.0546034	>95% vs <5%	6		63	0.406741	m.152T>C		0.0231618		0.839214		0.0220588	0.0220588		0.881175		124.735		0.0231618		0.839214
m.13368G>A	0.209862	>95% vs <5%	33		64	0.421272	m.16519T>C		0.0235294		0.839214		0.022409	0.022409		0.881175		126.139		0.0235294		0.839214
m.14233A>G	0.0546034	>95% vs <5%	5		65	0.421429	m.7768A>G		0.0238971		0.839214		0.0227591	0.0227591		0.881175		124.445		0.0238971		0.839214
m.14905G>A	0.209862	>95% vs <5%	32		66	0.421429	m.93A>G		0.0242647		0.839214		0.0231092	0.0231092		0.881175		122.716		0.0242647		0.839214
m.15452C>A	0.317715	>95% vs <5%	52		67	0.44429	m.15693T>C		0.0246324		0.839214		0.0234594	0.0234594		0.881175		125.965		0.0246324		0.839214
m.15607A>G	0.209862	>95% vs <5%	31		68	0.44429	m.14620C>T		0.025		0.839214		0.0238095	0.0238095		0.881175		124.165		0.025		0.839214
m.15928G>A	0.209862	>95% vs <5%	30		69	0.44429	m.11332C>T		0.0253676		0.839214		0.0241597	0.0241597		0.881175		122.366		0.0253676		0.839214
m.16126T>C	0.240146	>95% vs <5%	40		70	0.44429	m.6047A>G		0.0257353		0.839214		0.0245098	0.0245098		0.881175		120.566		0.0257353		0.839214
m.16294C>T	0.0956826	>95% vs <5%	11		71	0.44429	m.5999T>C		0.0261029		0.839214		0.0248599	0.0248599		0.881175		118.767		0.0261029		0.839214
m.16304T>C	0.260467	>95% vs <5%	44		72	0.44429	m.4646T>C		0.0264706		0.839214		0.0252101	0.0252101		0.881175		116.967		0.0264706		0.839214
m.16093T>C	0.744886	>95% vs <5%	110		73	0.45235	m.15043G>A		0.0268382		0.842734		0.0255602	0.0255602		0.884871		116.863		0.0268382		0.842734
m.249del	0.633955	>95% vs <5%	93		74	0.469423	m.150C>T		0.0272059		0.853774		0.0259104	0.0259104		0.896463		118.739		0.0272059		0.853774
m.489T>C	0.961589	>95% vs <5%	119		75	0.47106	m.14766C>T		0.0275735		0.853774		0.0262605	0.0262605		0.896463		117.216		0.0275735		0.853774
m.9545A>G	0.633955	>95% vs <5%	92		76	0.477693	m.16311T>C		0.0279412		0.853774		0.0266106	0.0266106		0.896463		116.789		0.0279412		0.853774
m.11914G>A	0.976489	>95% vs <5%	130		77	0.485788	m.14798T>C		0.0283088		0.853774		0.0269608	0.0269608		0.896463		116.683		0.0283088		0.853774
m.15043G>A	0.45235	>95% vs <5%	73		78	0.49522	m.195T>C		0.0286765		0.853774		0.0273109	0.0273109		0.896463		116.883		0.0286765		0.853774
m.15301G>A	0.667241	>95% vs <5%	97		79	0.495942	m.73A>G		0.0290441		0.853774		0.0276611	0.0276611		0.896463		115.066		0.0290441		0.853774
m.16129G>A	0.527129	>95% vs <5%	80		80	0.527129	m.16129G>A		0.0294118		0.881215		0.0280112	0.0280112		0.925276		120.54		0.0294118		0.881215
m.16298T>C	0.966025	>95% vs <5%	122		81	0.531221	m.10398A>G		0.0297794		0.881215		0.0283613	0.0283613		0.925276		119.459		0.0297794		0.881215
m.72T>C	0.970896	>95% vs <5%	126		82	0.537801	m.14793A>G		0.0301471		0.881215		0.0287115	0.0287115		0.925276		118.996		0.0301471		0.881215
m.93A>G	0.421429	>95% vs <5%	66		83	0.537801	m.8818C>T		0.0305147		0.881215		0.0290616	0.0290616		0.925276		116.833		0.0305147		0.881215
m.4580G>A	0.973574	>95% vs <5%	129		84	0.558612	m.228G>A		0.0308824		0.88914		0.0294118	0.0294118		0.933597		120.076		0.0308824		0.88914
m.15904C>T	0.729945	>95% vs <5%	103		85	0.559836	m.3010G>A		0.03125		0.88914		0.0297619	0.0297619		0.933597		118.138		0.03125		0.88914
m.199T>C	0.979746	>95% vs <5%	134		86	0.56225	m.11719G>A		0.0316176		0.88914		0.030112	0.030112		0.933597		116.505		0.0316176		0.88914
m.456C>T	0.368536	>95% vs <5%	57		87	0.569105	m.195T>C		0.0319853		0.889636		0.0304622	0.0304622		0.934118		116.038		0.0319853		0.889636
m.1719G>A	0.680036	>95% vs <5%	99		88	0.575871	m.16256C>T		0.0323529		0.889982		0.0308123	0.0308123		0.934481		115.531		0.0323529		0.889982
m.15924A>G	0.756609	>95% vs <5%	111		89	0.611677	m.16093T>C		0.0327206		0.916321		0.0311625	0.0311625		0.962137		123.608		0.0327206		0.916321
m.520_523dup	1	>95% vs <5%	136		90	0.625572	m.239T>C		0.0330882		0.916321		0.0315126	0.0315126		0.962137		125.525		0.0330882		0.916321
m.150C>T	0.469423	>95% vs <5%	74		91	0.633955	m.13966A>G		0.0334559		0.916321		0.0318627	0.0318627		0.962137		125.668		0.0334559		0.916321
m.3197T>C	0.316847	>95% vs <5%	50		92	0.633955	m.9545A>G		0.0338235		0.916321		0.0322129	0.0322129		0.962137		122.936		0.0338235		0.916321
m.7768A>G	0.421429	>95% vs <5%	65		93	0.633955	m.249del		0.0341912		0.916321		0.032563	0.032563		0.962137		120.204		0.0341912		0.916321
m.9477G>A	0.316847	>95% vs <5%	49		94	0.640077	m.7028C>T		0.0345588		0.916321		0.0329132	0.0329132		0.962137		119.47		0.0345588		0.916321
m.13617T>C	0.316847	>95% vs <5%	48		95	0.640077	m.2706A>G		0.0349265		0.916321		0.0332633	0.0332633		0.962137		116.692		0.0349265		0.916321
m.14182T>C	0.25963	>95% vs <5%	43		96	0.667241	m.16172T>C		0.0352941		0.918842		0.0336134	0.0336134		0.964784		123.212		0.0352941		0.918842
m.16270C>T	0.199897	>95% vs <5%	28		97	0.667241	m.15301G>A		0.0356618		0.918842		0.0339636	0.0339636		0.964784		120.207		0.0356618		0.918842
m.14793A>G	0.537801	>95% vs <5%	82		98	0.667241	m.16234C>T		0.0360294		0.918842		0.0343137	0.0343137		0.964784		117.202		0.0360294		0.918842
m.16256C>T	0.575871	>95% vs <5%	88		99	0.680036	m.1719G>A		0.0363971		0.918842		0.0346639	0.0346639		0.964784		118.763		0.0363971		0.918842
m.4336T>C	0.291345	>95% vs <5%	45		100	0.716632	m.228G>A		0.0367647		0.918842		0.035014	0.035014		0.964784		130.572		0.0367647		0.918842
m.16296C>T	0.177416	>95% vs <5%	24		101	0.720773	m.497C>T		0.0371324		0.918842		0.0353641	0.0353641		0.964784		128.927		0.0371324		0.918842
m.185G>A	0.970896	>95% vs <5%	125		102	0.723774	m.150C>T		0.0375		0.918842		0.0357143	0.0357143		0.964784		126.708		0.0375		0.918842
m.295C>T	0.966025	>95% vs <5%	121		103	0.729945	m.15904C>T		0.0378676		0.918842		0.0360644	0.0360644		0.964784		125.9		0.0378676		0.918842
m.462C>T	0.756693	>95% vs <5%	112		104	0.729945	m.16224T>C		0.0382353		0.918842		0.0364146	0.0364146		0.964784		122.197		0.0382353		0.918842
m.12612A>G	0.833841	>95% vs <5%	114		105	0.729945	m.11299T>C		0.0386029		0.918842		0.0367647	0.0367647		0.964784		118.494		0.0386029		0.918842
m.16069C>T	0.966025	>95% vs <5%	120		106	0.729945	m.10550A>G		0.0389706		0.918842		0.0371148	0.0371148		0.964784		114.792		0.0389706		0.918842
m.522_523del	0.865449	>95% vs <5%	116		107	0.729945	m.1189T>C		0.0393382		0.918842		0.037465	0.037465		0.964784		111.089		0.0393382		0.918842
m.16172T>C	0.667241	>95% vs <5%	96		108	0.729945	m.5460G>A		0.0397059		0.918842		0.0378151	0.0378151		0.964784		107.386		0.0397059		0.918842
m.188A>G	0.392707	>95% vs <5%	60		109	0.744886	m.16093T>C		0.0400735		0.918842		0.0381653	0.0381653		0.964784		109.755		0.0400735		0.918842
m.15218A>G	0.25963	>95% vs <5%	42		110	0.744886	m.16093T>C		0.0404412		0.918842		0.0385154	0.0385154		0.964784		105.835		0.0404412		0.918842
m.16291C>T	0.152902	>95% vs <5%	20		111	0.756609	m.15924A>G		0.0408088		0.918842		0.0388655	0.0388655		0.964784		106.824		0.0408088		0.918842
m.16399A>G	0.0939246	>95% vs <5%	10		112	0.756693	m.462C>T		0.0411765		0.918842		0.0392157	0.0392157		0.964784		102.751		0.0411765		0.918842
m.15833C>T	0.392707	>95% vs <5%	59		113	0.803384	m.16356T>C		0.0415441		0.966905		0.0395658	0.0395658		1.01525		122.066		0.0415441		0.966905
m.13934C>T	0.979746	>95% vs <5%	133		114	0.833841	m.12612A>G		0.0419118		0.994369		0.039916	0.039916		1.04409		136		0.0419118		0.994369
m.497C>T	0.720773	>95% vs <5%	101		115	0.862092	m.16519T>C		0.0422794		0.994369		0.0402661	0.0402661		1.04409		136		0.0422794		0.994369
m.16051A>G	0.157188	>95% vs <5%	21		116	0.865449	m.522_523del		0.0426471		0.994369		0.0406162	0.0406162		1.04409		136		0.0426471		0.994369
m.13966A>G	0.633955	>95% vs <5%	91		117	0.867134	m.522_523del		0.0430147		0.994369		0.0409664	0.0409664		1.04409		136		0.0430147		0.994369
m.522_523dup	0.127484	5-95% vs homo	16		118	0.870741	m.73A>G		0.0433824		0.994369		0.0413165	0.0413165		1.04409		136		0.0433824		0.994369
m.16093T>C	0.744886	5-95% vs homo	109		119	0.961589	m.489T>C		0.04375		0.994369		0.0416667	0.0416667		1.04409		136		0.04375		0.994369
m.520_523dup	1	5-95% vs homo	135		120	0.966025	m.16069C>T		0.0441176		0.994369		0.0420168	0.0420168		1.04409		136		0.0441176		0.994369
m.73A>G	0.870741	variant dose	118		121	0.966025	m.295C>T		0.0444853		0.994369		0.0423669	0.0423669		1.04409		136		0.0444853		0.994369
m.195T>C	0.49522	variant dose	78		122	0.966025	m.16298T>C		0.0448529		0.994369		0.0427171	0.0427171		1.04409		136		0.0448529		0.994369
m.204T>C	0.129745	variant dose	18		123	0.966025	m.9055G>A		0.0452206		0.994369		0.0430672	0.0430672		1.04409		136		0.0452206		0.994369
m.16519T>C	0.862092	variant dose	115		124	0.968393	m.9698T>C		0.0455882		0.994369		0.0434174	0.0434174		1.04409		136		0.0455882		0.994369
m.522_523dup	0.20524	variant dose	29		125	0.970896	m.185G>A		0.0459559		0.994369		0.0437675	0.0437675		1.04409		136		0.0459559		0.994369
m.152T>C	0.406741	variant dose	63		126	0.970896	m.72T>C		0.0463235		0.994369		0.0441176	0.0441176		1.04409		136		0.0463235		0.994369
m.16311T>C	0.359602	variant dose	56		127	0.970896	m.14167C>T		0.0466912		0.994369		0.0444678	0.0444678		1.04409		136		0.0466912		0.994369
m.239T>C	0.393991	variant dose	61		128	0.970896	m.3480A>G		0.0470588		0.994369		0.0448179	0.0448179		1.04409		136		0.0470588		0.994369
m.228G>A	0.558612	variant dose	84		129	0.973574	m.4580G>A		0.0474265		0.994369		0.0451681	0.0451681		1.04409		136		0.0474265		0.994369
m.16093T>C	0.611677	variant dose	89		130	0.976489	m.11914G>A		0.0477941		0.994369		0.0455182	0.0455182		1.04409		136		0.0477941		0.994369
m.520_523dup	0.976556	variant dose	132		131	0.976489	m.477T>C		0.0481618		0.994369		0.0458683	0.0458683		1.04409		136		0.0481618		0.994369
m.150C>T	0.723774	variant dose	102		132	0.976556	m.520_523dup		0.0485294		0.994369		0.0462185	0.0462185		1.04409		136		0.0485294		0.994369
m.16270C>T	0.303468	variant dose	47		133	0.979746	m.13934C>T		0.0488971		0.994369		0.0465686	0.0465686		1.04409		136		0.0488971		0.994369
m.16296C>T	0.109452	variant dose	13		134	0.979746	m.199T>C		0.0492647		0.994369		0.0469188	0.0469188		1.04409		136		0.0492647		0.994369
m.522_523del	0.867134	variant dose	117		135	1	m.520_523dup		0.0496324		1		0.0472689	0.0472689		1.05		#DIV/0!		0.0496324		1
m.16291C>T	0.0976673	variant dose	12		136	1	m.520_523dup		0.05		1		0.047619	0.047619		1.05		#DIV/0!		0.05		1

## Sheet: FDR SNV3
Multiple comparisons using False Discovery Rates (FDRs)											Set maximum acceptable FDR:	0.05
2-COLUMN INPUT AREA		OUTPUT AREA						Classical one-stage method*				Two-stage sharpened method†					Graphically sharpened method‡
								FDR-derived		FDR-adjusted		Stage 1	Stage 2		FDR-adjusted		Point		FDR-derived		FDR-adjusted
Hypothesis		Unique			Ascending	Hypothesis		significance		p-values		significance	significance		p-values		estimates of	Best	significance		p-values
name	p-values	rank		Order	p-values	name		thresholds		a.k.a. q-values		thresholds	thresholds		a.k.a. q-values		no. of H0s	estimate	thresholds		a.k.a. q-values
1. >=95% vs <5%, P+E vs C, m.73A>G	0.495942	252		1	0.0155477	120. >=95% vs <5%, P vs E, m.709G>A		0.000105263		0.728703		0.000100251	0.000100251		0.765138		475		0.000105485		0.727169
2. >=95% vs <5%, P+E vs C, m.194C>T	0.0221154	6		2	0.0170237	312. >=95% vs <5%, P vs C, m.709G>A		0.000210526		0.728703		0.000200501	0.000200501		0.765138		475		0.00021097		0.727169
3. >=95% vs <5%, P+E vs C, m.195T>C	0.569105	285		3	0.0221154	16. >=95% vs <5%, P+E vs C, m.12414T>C		0.000315789		0.728703		0.000300752	0.000300752		0.765138		475		0.000316456		0.727169
4. >=95% vs <5%, P+E vs C, m.204T>C	0.112401	60		4	0.0221154	15. >=95% vs <5%, P+E vs C, m.11947A>G		0.000421053		0.728703		0.000401003	0.000401003		0.765138		475		0.000421941		0.727169
5. >=95% vs <5%, P+E vs C, m.207G>A	0.140607	89		5	0.0221154	13. >=95% vs <5%, P+E vs C, m.8994G>A		0.000526316		0.728703		0.000501253	0.000501253		0.765138		475		0.000527426		0.727169
6. >=95% vs <5%, P+E vs C, m.709G>A	0.199446	122		6	0.0221154	2. >=95% vs <5%, P+E vs C, m.194C>T		0.000631579		0.728703		0.000601504	0.000601504		0.765138		475		0.000632911		0.727169
7. >=95% vs <5%, P+E vs C, m.1438A>G	0.237105	142		7	0.0234494	360. >=95% vs <5%, P vs C, m.930G>A		0.000736842		0.728703		0.000701754	0.000701754		0.765138		475		0.000738397		0.727169
8. >=95% vs <5%, P+E vs C, m.2706A>G	0.640077	333		8	0.0339536	473. Variant dose, P vs C, m.16296C>T		0.000842105		0.728703		0.000802005	0.000802005		0.765138		475		0.000843882		0.727169
9. >=95% vs <5%, P+E vs C, m.4769A>G	0.0921719	40		9	0.0440637	370. >=95% vs <5%, P vs C, m.14233A>G		0.000947368		0.728703		0.000902256	0.000902256		0.765138		475		0.000949367		0.727169
10. >=95% vs <5%, P+E vs C, m.5460G>A	0.729945	365		10	0.0440637	368. >=95% vs <5%, P vs C, m.11812A>G		0.00105263		0.728703		0.00100251	0.00100251		0.765138		475		0.00105485		0.727169
11. >=95% vs <5%, P+E vs C, m.7028C>T	0.640077	332		11	0.0460462	401. >=95% vs <5%, P vs C, m.16296C>T		0.00115789		0.728703		0.00110276	0.00110276		0.765138		475		0.00116034		0.727169
12. >=95% vs <5%, P+E vs C, m.8251G>A	0.182971	108		12	0.0466374	376. >=95% vs <5%, P vs C, m.16294C>T		0.00126316		0.728703		0.00120301	0.00120301		0.765138		475		0.00126582		0.727169
13. >=95% vs <5%, P+E vs C, m.8994G>A	0.0221154	5		13	0.0546034	65. >=95% vs <5%, P+E vs C, m.14233A>G		0.00136842		0.728703		0.00130326	0.00130326		0.765138		475		0.00137131		0.727169
14. >=95% vs <5%, P+E vs C, m.11719G>A	0.56225	281		14	0.0546034	63. >=95% vs <5%, P+E vs C, m.11812A>G		0.00147368		0.728703		0.00140351	0.00140351		0.765138		475		0.00147679		0.727169
15. >=95% vs <5%, P+E vs C, m.11947A>G	0.0221154	4		15	0.0546034	17. >=95% vs <5%, P+E vs C, m.12705C>T		0.00157895		0.728703		0.00150376	0.00150376		0.765138		475		0.00158228		0.727169
16. >=95% vs <5%, P+E vs C, m.12414T>C	0.0221154	3		16	0.0646315	366. >=95% vs <5%, P vs C, m.10463T>C		0.00168421		0.728703		0.00160401	0.00160401		0.765138		475		0.00168776		0.727169
17. >=95% vs <5%, P+E vs C, m.12705C>T	0.0546034	15		17	0.0665027	129. >=95% vs <5%, P vs E, m.499G>A		0.00178947		0.728703		0.00170426	0.00170426		0.765138		475		0.00179325		0.727169
18. >=95% vs <5%, P+E vs C, m.14766C>T	0.47106	240		18	0.0665955	329. >=95% vs <5%, P vs C, m.499G>A		0.00189474		0.728703		0.00180451	0.00180451		0.765138		475		0.00189873		0.727169
19. >=95% vs <5%, P+E vs C, m.16223C>T	0.126139	71		19	0.0671458	311. >=95% vs <5%, P vs C, m.207G>A		0.002		0.728703		0.00190476	0.00190476		0.765138		475		0.00200422		0.727169
20. >=95% vs <5%, P+E vs C, m.16234C>T	0.667241	340		20	0.0681194	55. >=95% vs <5%, P+E vs C, m.930G>A		0.00210526		0.728703		0.00200501	0.00200501		0.765138		475		0.0021097		0.727169
21. >=95% vs <5%, P+E vs C, m.16519T>C	0.421272	220		21	0.0681349	189. >=95% vs <5%, P vs E, m.16256C>T		0.00221053		0.728703		0.00210526	0.00210526		0.765138		475		0.00221519		0.727169
22. >=95% vs <5%, P+E vs C, m.477T>C	0.976489	468		22	0.0693943	289. >=95% vs <5%, E vs C, m.14182T>C		0.00231579		0.728703		0.00220551	0.00220551		0.765138		475		0.00232068		0.727169
23. >=95% vs <5%, P+E vs C, m.3010G>A	0.559836	280		23	0.0695542	154. >=95% vs <5%, P vs E, m.14167C>T		0.00242105		0.728703		0.00230576	0.00230576		0.765138		475		0.00242616		0.727169
24. >=95% vs <5%, P+E vs C, m.499G>A	0.316847	177		24	0.0695542	148. >=95% vs <5%, P vs E, m.3480A>G		0.00252632		0.728703		0.00240602	0.00240602		0.765138		475		0.00253165		0.727169
25. >=95% vs <5%, P+E vs C, m.1811A>G	0.298764	171		25	0.0710085	337. >=95% vs <5%, P vs C, m.12372G>A		0.00263158		0.728703		0.00250627	0.00250627		0.765138		475		0.00263713		0.727169
26. >=95% vs <5%, P+E vs C, m.4646T>C	0.44429	233		26	0.0710085	336. >=95% vs <5%, P vs C, m.12308A>G		0.00273684		0.728703		0.00260652	0.00260652		0.765138		475		0.00274262		0.727169
27. >=95% vs <5%, P+E vs C, m.5999T>C	0.44429	232		27	0.0710085	335. >=95% vs <5%, P vs C, m.11467A>G		0.00284211		0.728703		0.00270677	0.00270677		0.765138		475		0.0028481		0.727169
28. >=95% vs <5%, P+E vs C, m.6047A>G	0.44429	231		28	0.0728906	342. >=95% vs <5%, P vs C, m.522_523dup		0.00294737		0.728703		0.00280702	0.00280702		0.765138		475		0.00295359		0.727169
29. >=95% vs <5%, P+E vs C, m.11332C>T	0.44429	230		29	0.081556	293. >=95% vs <5%, E vs C, m.4336T>C		0.00305263		0.728703		0.00290727	0.00290727		0.765138		475		0.00305907		0.727169
30. >=95% vs <5%, P+E vs C, m.11467A>G	0.173697	102		30	0.0834905	377. >=95% vs <5%, P vs C, m.16304T>C		0.00315789		0.728703		0.00300752	0.00300752		0.765138		475		0.00316456		0.727169
31. >=95% vs <5%, P+E vs C, m.12308A>G	0.226849	137		31	0.0872106	364. >=95% vs <5%, P vs C, m.5147G>A		0.00326316		0.728703		0.00310777	0.00310777		0.765138		475		0.00327004		0.727169
32. >=95% vs <5%, P+E vs C, m.12372G>A	0.173697	101		32	0.0876773	462. Variant dose, P vs C, m.204T>C		0.00336842		0.728703		0.00320802	0.00320802		0.765138		475		0.00337553		0.727169
33. >=95% vs <5%, P+E vs C, m.13708G>A	0.339093	185		33	0.0891352	374. >=95% vs <5%, P vs C, m.15928G>A		0.00347368		0.728703		0.00330827	0.00330827		0.765138		475		0.00348101		0.727169
34. >=95% vs <5%, P+E vs C, m.14620C>T	0.44429	229		34	0.0891352	373. >=95% vs <5%, P vs C, m.15607A>G		0.00357895		0.728703		0.00340852	0.00340852		0.765138		475		0.0035865		0.727169
35. >=95% vs <5%, P+E vs C, m.15693T>C	0.44429	228		35	0.0891352	371. >=95% vs <5%, P vs C, m.14905G>A		0.00368421		0.728703		0.00350877	0.00350877		0.765138		475		0.00369198		0.727169
36. >=95% vs <5%, P+E vs C, m.16356T>C	0.803384	392		36	0.0891352	369. >=95% vs <5%, P vs C, m.13368G>A		0.00378947		0.728703		0.00360902	0.00360902		0.765138		475		0.00379747		0.727169
37. >=95% vs <5%, P+E vs C, m.522_523dup	0.127484	72		37	0.0891352	365. >=95% vs <5%, P vs C, m.8697G>A		0.00389474		0.728703		0.00370927	0.00370927		0.765138		475		0.00390295		0.727169
38. >=95% vs <5%, P+E vs C, m.152T>C	0.375655	200		38	0.0891352	363. >=95% vs <5%, P vs C, m.4917A>G		0.004		0.728703		0.00380952	0.00380952		0.765138		475		0.00400844		0.727169
39. >=95% vs <5%, P+E vs C, m.16311T>C	0.477693	245		39	0.0891352	361. >=95% vs <5%, P vs C, m.1888G>A		0.00410526		0.728703		0.00390977	0.00390977		0.765138		475		0.00411392		0.727169
40. >=95% vs <5%, P+E vs C, m.239T>C	0.625572	314		40	0.0921719	9. >=95% vs <5%, P+E vs C, m.4769A>G		0.00421053		0.728703		0.00401003	0.00401003		0.765138		475		0.00421941		0.727169
41. >=95% vs <5%, P+E vs C, m.16362T>C	0.39687	213		41	0.0939246	112. >=95% vs <5%, P+E vs C, m.16399A>G		0.00431579		0.728703		0.00411028	0.00411028		0.765138		475		0.00432489		0.727169
42. >=95% vs <5%, P+E vs C, m.8818C>T	0.537801	266		42	0.095633	411. >=95% vs <5%, P vs C, m.16399A>G		0.00442105		0.728703		0.00421053	0.00421053		0.765138		475		0.00443038		0.727169
43. >=95% vs <5%, P+E vs C, m.146T>C	0.334083	182		43	0.095633	409. >=95% vs <5%, P vs C, m.15218A>G		0.00452632		0.728703		0.00431078	0.00431078		0.765138		475		0.00453586		0.727169
44. >=95% vs <5%, P+E vs C, m.1189T>C	0.729945	364		44	0.0956826	71. >=95% vs <5%, P+E vs C, m.16294C>T		0.00463158		0.728703		0.00441103	0.00441103		0.765138		475		0.00464135		0.727169
45. >=95% vs <5%, P+E vs C, m.3480A>G	0.970896	462		45	0.0958375	322. >=95% vs <5%, P vs C, m.12414T>C		0.00473684		0.728703		0.00451128	0.00451128		0.765138		475		0.00474684		0.727169
46. >=95% vs <5%, P+E vs C, m.9055G>A	0.966025	455		46	0.0958375	321. >=95% vs <5%, P vs C, m.11947A>G		0.00484211		0.728703		0.00461153	0.00461153		0.765138		475		0.00485232		0.727169
47. >=95% vs <5%, P+E vs C, m.9698T>C	0.968393	457		47	0.0958375	319. >=95% vs <5%, P vs C, m.8994G>A		0.00494737		0.728703		0.00471178	0.00471178		0.765138		474.472		0.00495781		0.727169
48. >=95% vs <5%, P+E vs C, m.10398A>G	0.531221	263		48	0.0958375	315. >=95% vs <5%, P vs C, m.4769A>G		0.00505263		0.728703		0.00481203	0.00481203		0.765138		473.366		0.00506329		0.727169
49. >=95% vs <5%, P+E vs C, m.10550A>G	0.729945	363		49	0.0958375	308. >=95% vs <5%, P vs C, m.194C>T		0.00515789		0.728703		0.00491228	0.00491228		0.765138		472.26		0.00516878		0.727169
50. >=95% vs <5%, P+E vs C, m.11299T>C	0.729945	362		50	0.0976673	437. Variant dose, P+E vs C, m.16291C>T		0.00526316		0.728703		0.00501253	0.00501253		0.765138		472.11		0.00527426		0.727169
51. >=95% vs <5%, P+E vs C, m.14167C>T	0.970896	461		51	0.0992192	475. Variant dose, P vs C, m.16291C>T		0.00536842		0.728703		0.00511278	0.00511278		0.765138		471.813		0.00537975		0.727169
52. >=95% vs <5%, P+E vs C, m.14798T>C	0.485788	248		52	0.10392	163. >=95% vs <5%, P vs E, m.10463T>C		0.00547368		0.728703		0.00521303	0.00521303		0.765138		473.172	True	0.00548523		0.727169
53. >=95% vs <5%, P+E vs C, m.16224T>C	0.729945	361		53	0.109452	435. Variant dose, P+E vs C, m.16296C>T		0.00557895		0.728703		0.00531328	0.00531328		0.765138		474.989		0.00559072		0.727169
54. >=95% vs <5%, P+E vs C, m.228G>A	0.716632	352		54	0.111579	140. >=95% vs <5%, P vs E, m.15693T>C		0.00568421		0.728703		0.00541353	0.00541353		0.765138		475		0.0056962		0.727169
55. >=95% vs <5%, P+E vs C, m.930G>A	0.0681194	20		55	0.111579	139. >=95% vs <5%, P vs E, m.14620C>T		0.00578947		0.728703		0.00551378	0.00551378		0.765138		473.875		0.00580169		0.727169
56. >=95% vs <5%, P+E vs C, m.1888G>A	0.209862	133		56	0.111579	134. >=95% vs <5%, P vs E, m.11332C>T		0.00589474		0.728703		0.00561404	0.00561404		0.765138		472.749		0.00590717		0.727169
57. >=95% vs <5%, P+E vs C, m.4216T>C	0.178084	105		57	0.111579	133. >=95% vs <5%, P vs E, m.6047A>G		0.006		0.728703		0.00571429	0.00571429		0.765138		471.623		0.00601266		0.727169
58. >=95% vs <5%, P+E vs C, m.4917A>G	0.209862	132		58	0.111579	132. >=95% vs <5%, P vs E, m.5999T>C		0.00610526		0.728703		0.00581454	0.00581454		0.765138		470.498		0.00611814		0.727169
59. >=95% vs <5%, P+E vs C, m.5147G>A	0.250522	154		59	0.111579	131. >=95% vs <5%, P vs E, m.4646T>C		0.00621053		0.728703		0.00591479	0.00591479		0.765138		469.372		0.00622363		0.727169
60. >=95% vs <5%, P+E vs C, m.8697G>A	0.209862	131		60	0.112401	4. >=95% vs <5%, P+E vs C, m.204T>C		0.00631579		0.728703		0.00601504	0.00601504		0.765138		468.68		0.00632911		0.727169
61. >=95% vs <5%, P+E vs C, m.10463T>C	0.228493	138		61	0.113138	215. >=95% vs <5%, E vs C, m.12414T>C		0.00642105		0.728703		0.00611529	0.00611529		0.765138		467.942		0.0064346		0.727169
62. >=95% vs <5%, P+E vs C, m.11251A>G	0.317715	179		62	0.113138	214. >=95% vs <5%, E vs C, m.11947A>G		0.00652632		0.728703		0.00621554	0.00621554		0.765138		466.815		0.00654008		0.727169
63. >=95% vs <5%, P+E vs C, m.11812A>G	0.0546034	14		63	0.113138	212. >=95% vs <5%, E vs C, m.8994G>A		0.00663158		0.728703		0.00631579	0.00631579		0.765138		465.687		0.00664557		0.727169
64. >=95% vs <5%, P+E vs C, m.13368G>A	0.209862	130		64	0.113138	201. >=95% vs <5%, E vs C, m.194C>T		0.00673684		0.728703		0.00641604	0.00641604		0.765138		464.56		0.00675105		0.727169
65. >=95% vs <5%, P+E vs C, m.14233A>G	0.0546034	13		65	0.113441	464. Variant dose, P vs C, m.522_523dup		0.00684211		0.728703		0.00651629	0.00651629		0.765138		463.59		0.00685654		0.727169
66. >=95% vs <5%, P+E vs C, m.14905G>A	0.209862	129		66	0.11895	188. >=95% vs <5%, P vs E, m.14793A>G		0.00694737		0.728703		0.00661654	0.00661654		0.765138		465.354		0.00696203		0.727169
67. >=95% vs <5%, P+E vs C, m.15452C>A	0.317715	178		67	0.11895	146. >=95% vs <5%, P vs E, m.8818C>T		0.00705263		0.728703		0.00671679	0.00671679		0.765138		464.219		0.00706751		0.727169
68. >=95% vs <5%, P+E vs C, m.15607A>G	0.209862	128		68	0.119278	310. >=95% vs <5%, P vs C, m.204T>C		0.00715789		0.728703		0.00681704	0.00681704		0.765138		463.256		0.007173		0.727169
69. >=95% vs <5%, P+E vs C, m.15928G>A	0.209862	127		69	0.122322	323. >=95% vs <5%, P vs C, m.12705C>T		0.00726316		0.728703		0.00691729	0.00691729		0.765138		463.724		0.00727848		0.727169
70. >=95% vs <5%, P+E vs C, m.16126T>C	0.240146	145		70	0.123222	218. >=95% vs <5%, E vs C, m.16223C>T		0.00736842		0.728703		0.00701754	0.00701754		0.765138		463.059		0.00738397		0.727169
71. >=95% vs <5%, P+E vs C, m.16294C>T	0.0956826	44		71	0.126139	19. >=95% vs <5%, P+E vs C, m.16223C>T		0.00747368		0.728703		0.00711779	0.00711779		0.765138		463.461		0.00748945		0.727169
72. >=95% vs <5%, P+E vs C, m.16304T>C	0.260467	161		72	0.127484	37. >=95% vs <5%, P+E vs C, m.522_523dup		0.00757895		0.728703		0.00721805	0.00721805		0.765138		463.029		0.00759494		0.727169
73. >=95% vs <5%, P+E vs C, m.16093T>C	0.744886	370		73	0.129745	424. Variant dose, P+E vs C, m.204T>C		0.00768421		0.728703		0.0073183	0.0073183		0.765138		463.082		0.00770042		0.727169
74. >=95% vs <5%, P+E vs C, m.249del	0.633955	320		74	0.132466	172. >=95% vs <5%, P vs E, m.16304T>C		0.00778947		0.728703		0.00741855	0.00741855		0.765138		463.383		0.00780591		0.727169
75. >=95% vs <5%, P+E vs C, m.489T>C	0.961589	448		75	0.133579	340. >=95% vs <5%, P vs C, m.15693T>C		0.00789474		0.728703		0.0075188	0.0075188		0.765138		462.824		0.00791139		0.727169
76. >=95% vs <5%, P+E vs C, m.9545A>G	0.633955	319		76	0.133579	339. >=95% vs <5%, P vs C, m.14620C>T		0.008		0.728703		0.00761905	0.00761905		0.765138		461.67		0.00801688		0.727169
77. >=95% vs <5%, P+E vs C, m.11914G>A	0.976489	467		77	0.133579	334. >=95% vs <5%, P vs C, m.11332C>T		0.00810526		0.728703		0.0077193	0.0077193		0.765138		460.515		0.00812236		0.727169
78. >=95% vs <5%, P+E vs C, m.15043G>A	0.45235	237		78	0.133579	333. >=95% vs <5%, P vs C, m.6047A>G		0.00821053		0.728703		0.00781955	0.00781955		0.765138		459.361		0.00822785		0.727169
79. >=95% vs <5%, P+E vs C, m.15301G>A	0.667241	339		79	0.133579	332. >=95% vs <5%, P vs C, m.5999T>C		0.00831579		0.728703		0.0079198	0.0079198		0.765138		458.207		0.00833333		0.727169
80. >=95% vs <5%, P+E vs C, m.16129G>A	0.527129	259		80	0.133579	331. >=95% vs <5%, P vs C, m.4646T>C		0.00842105		0.728703		0.00802005	0.00802005		0.765138		457.053		0.00843882		0.727169
81. >=95% vs <5%, P+E vs C, m.16298T>C	0.966025	454		81	0.135002	186. >=95% vs <5%, P vs E, m.14182T>C		0.00852632		0.728703		0.0081203	0.0081203		0.765138		456.648		0.0085443		0.727169
82. >=95% vs <5%, P+E vs C, m.72T>C	0.970896	460		82	0.135002	179. >=95% vs <5%, P vs E, m.15904C>T		0.00863158		0.728703		0.00822055	0.00822055		0.765138		455.492		0.00864979		0.727169
83. >=95% vs <5%, P+E vs C, m.93A>G	0.421429	222		83	0.135002	178. >=95% vs <5%, P vs E, m.4580G>A		0.00873684		0.728703		0.0083208	0.0083208		0.765138		454.336		0.00875527		0.727169
84. >=95% vs <5%, P+E vs C, m.4580G>A	0.973574	464		84	0.135002	161. >=95% vs <5%, P vs E, m.5147G>A		0.00884211		0.728703		0.00842105	0.00842105		0.765138		453.18		0.00886076		0.727169
85. >=95% vs <5%, P+E vs C, m.15904C>T	0.729945	360		85	0.135002	156. >=95% vs <5%, P vs E, m.16224T>C		0.00894737		0.728703		0.0085213	0.0085213		0.765138		452.024		0.00896624		0.727169
86. >=95% vs <5%, P+E vs C, m.199T>C	0.979746	471		86	0.135002	153. >=95% vs <5%, P vs E, m.11299T>C		0.00905263		0.728703		0.00862155	0.00862155		0.765138		450.868		0.00907173		0.727169
87. >=95% vs <5%, P+E vs C, m.456C>T	0.368536	197		87	0.135002	152. >=95% vs <5%, P vs E, m.10550A>G		0.00915789		0.728703		0.0087218	0.0087218		0.765138		449.712		0.00917722		0.727169
88. >=95% vs <5%, P+E vs C, m.1719G>A	0.680036	342		88	0.135002	147. >=95% vs <5%, P vs E, m.1189T>C		0.00926316		0.728703		0.00882206	0.00882206		0.765138		448.556		0.0092827		0.727169
89. >=95% vs <5%, P+E vs C, m.15924A>G	0.756609	373		89	0.140607	5. >=95% vs <5%, P+E vs C, m.207G>A		0.00936842		0.737996		0.00892231	0.00892231		0.774896		450.318		0.00938819		0.736443
90. >=95% vs <5%, P+E vs C, m.520_523dup	1	475		90	0.152902	111. >=95% vs <5%, P+E vs C, m.16291C>T		0.00947368		0.737996		0.00902256	0.00902256		0.774896		455.674		0.00949367		0.736443
91. >=95% vs <5%, P+E vs C, m.150C>T	0.469423	239		91	0.154871	280. >=95% vs <5%, E vs C, m.456C>T		0.00957895		0.737996		0.00912281	0.00912281		0.774896		455.552		0.00959916		0.736443
92. >=95% vs <5%, P+E vs C, m.3197T>C	0.316847	176		92	0.155477	399. >=95% vs <5%, P vs C, m.16256C>T		0.00968421		0.737996		0.00922306	0.00922306		0.774896		454.695		0.00970464		0.736443
93. >=95% vs <5%, P+E vs C, m.7768A>G	0.421429	221		93	0.155521	330. >=95% vs <5%, P vs C, m.1811A>G		0.00978947		0.737996		0.00932331	0.00932331		0.774896		453.534		0.00981013		0.736443
94. >=95% vs <5%, P+E vs C, m.9477G>A	0.316847	175		94	0.155609	136. >=95% vs <5%, P vs E, m.12308A>G		0.00989474		0.737996		0.00942356	0.00942356		0.774896		452.397		0.00991561		0.736443
95. >=95% vs <5%, P+E vs C, m.13617T>C	0.316847	174		95	0.157188	116. >=95% vs <5%, P+E vs C, m.16051A>G		0.01		0.737996		0.00952381	0.00952381		0.774896		452.058		0.0100211		0.736443
96. >=95% vs <5%, P+E vs C, m.14182T>C	0.25963	160		96	0.159477	452. Variant dose, E vs C, m.239T>C		0.0101053		0.737996		0.00962406	0.00962406		0.774896		452.1		0.0101266		0.736443
97. >=95% vs <5%, P+E vs C, m.16270C>T	0.199897	123		97	0.161035	397. >=95% vs <5%, P vs C, m.16270C>T		0.0102105		0.737996		0.00972431	0.00972431		0.774896		451.747		0.0102321		0.736443
98. >=95% vs <5%, P+E vs C, m.14793A>G	0.537801	265		98	0.164211	216. >=95% vs <5%, E vs C, m.12705C>T		0.0103158		0.737996		0.00982456	0.00982456		0.774896		452.267		0.0103376		0.736443
99. >=95% vs <5%, P+E vs C, m.16256C>T	0.575871	286		99	0.171829	348. >=95% vs <5%, P vs C, m.146T>C		0.0104211		0.737996		0.00992481	0.00992481		0.774896		455.22		0.010443		0.736443
100. >=95% vs <5%, P+E vs C, m.4336T>C	0.291345	170		100	0.171829	318. >=95% vs <5%, P vs C, m.8251G>A		0.0105263		0.737996		0.0100251	0.0100251		0.774896		454.012		0.0105485		0.736443
101. >=95% vs <5%, P+E vs C, m.16296C>T	0.177416	104		101	0.173697	32. >=95% vs <5%, P+E vs C, m.12372G>A		0.0106316		0.737996		0.0101253	0.0101253		0.774896		453.829		0.010654		0.736443
102. >=95% vs <5%, P+E vs C, m.185G>A	0.970896	459		102	0.173697	30. >=95% vs <5%, P+E vs C, m.11467A>G		0.0107368		0.737996		0.0102256	0.0102256		0.774896		452.618		0.0107595		0.736443
103. >=95% vs <5%, P+E vs C, m.295C>T	0.966025	453		103	0.175488	362. >=95% vs <5%, P vs C, m.4216T>C		0.0108421		0.737996		0.0103258	0.0103258		0.774896		452.389		0.010865		0.736443
104. >=95% vs <5%, P+E vs C, m.462C>T	0.756693	374		104	0.177416	101. >=95% vs <5%, P+E vs C, m.16296C>T		0.0109474		0.737996		0.0104261	0.0104261		0.774896		452.233		0.0109705		0.736443
105. >=95% vs <5%, P+E vs C, m.12612A>G	0.833841	402		105	0.178084	57. >=95% vs <5%, P+E vs C, m.4216T>C		0.0110526		0.737996		0.0105263	0.0105263		0.774896		451.385		0.0110759		0.736443
106. >=95% vs <5%, P+E vs C, m.16069C>T	0.966025	452		106	0.179849	398. >=95% vs <5%, P vs C, m.14793A>G		0.0111579		0.737996		0.0106266	0.0106266		0.774896		451.136		0.0111814		0.736443
107. >=95% vs <5%, P+E vs C, m.522_523del	0.865449	414		107	0.179849	347. >=95% vs <5%, P vs C, m.8818C>T		0.0112632		0.737996		0.0107268	0.0107268		0.774896		449.917		0.0112869		0.736443
108. >=95% vs <5%, P+E vs C, m.16172T>C	0.667241	338		108	0.182971	12. >=95% vs <5%, P+E vs C, m.8251G>A		0.0113684		0.737996		0.0108271	0.0108271		0.774896		450.413		0.0113924		0.736443
109. >=95% vs <5%, P+E vs C, m.188A>G	0.392707	206		109	0.184156	306. >=95% vs <5%, E vs C, m.16051A>G		0.0114737		0.737996		0.0109273	0.0109273		0.774896		449.841		0.0114979		0.736443
110. >=95% vs <5%, P+E vs C, m.15218A>G	0.25963	159		110	0.184156	303. >=95% vs <5%, E vs C, m.16399A>G		0.0115789		0.737996		0.0110276	0.0110276		0.774896		448.615		0.0116034		0.736443
111. >=95% vs <5%, P+E vs C, m.16291C>T	0.152902	90		111	0.184156	302. >=95% vs <5%, E vs C, m.16291C>T		0.0116842		0.737996		0.0111278	0.0111278		0.774896		447.389		0.0117089		0.736443
112. >=95% vs <5%, P+E vs C, m.16399A>G	0.0939246	41		112	0.184156	286. >=95% vs <5%, E vs C, m.7768A>G		0.0117895		0.737996		0.0112281	0.0112281		0.774896		446.164		0.0118143		0.736443
113. >=95% vs <5%, P+E vs C, m.15833C>T	0.392707	205		113	0.187995	171. >=95% vs <5%, P vs E, m.16294C>T		0.0118947		0.737996		0.0113283	0.0113283		0.774896		447.042		0.0119198		0.736443
114. >=95% vs <5%, P+E vs C, m.13934C>T	0.979746	470		114	0.187995	169. >=95% vs <5%, P vs E, m.15928G>A		0.012		0.737996		0.0114286	0.0114286		0.774896		445.81		0.0120253		0.736443
115. >=95% vs <5%, P+E vs C, m.497C>T	0.720773	354		115	0.187995	168. >=95% vs <5%, P vs E, m.15607A>G		0.0121053		0.737996		0.0115288	0.0115288		0.774896		444.578		0.0121308		0.736443
116. >=95% vs <5%, P+E vs C, m.16051A>G	0.157188	95		116	0.187995	166. >=95% vs <5%, P vs E, m.14905G>A		0.0122105		0.737996		0.0116291	0.0116291		0.774896		443.347		0.0122363		0.736443
117. >=95% vs <5%, P+E vs C, m.13966A>G	0.633955	318		117	0.187995	165. >=95% vs <5%, P vs E, m.13368G>A		0.0123158		0.737996		0.0117293	0.0117293		0.774896		442.115		0.0123418		0.736443
118. >=95% vs <5%, P vs E, m.73A>G	0.508341	254		118	0.187995	162. >=95% vs <5%, P vs E, m.8697G>A		0.0124211		0.737996		0.0118296	0.0118296		0.774896		440.884		0.0124473		0.736443
119. >=95% vs <5%, P vs E, m.195T>C	0.512692	255		119	0.187995	160. >=95% vs <5%, P vs E, m.4917A>G		0.0125263		0.737996		0.0119298	0.0119298		0.774896		439.652		0.0125527		0.736443
120. >=95% vs <5%, P vs E, m.709G>A	0.0155477	1		120	0.187995	158. >=95% vs <5%, P vs E, m.1888G>A		0.0126316		0.737996		0.0120301	0.0120301		0.774896		438.421		0.0126582		0.736443
121. >=95% vs <5%, P vs E, m.2706A>G	0.849424	410		121	0.187995	150. >=95% vs <5%, P vs E, m.9698T>C		0.0127368		0.737996		0.0121303	0.0121303		0.774896		437.189		0.0127637		0.736443
122. >=95% vs <5%, P vs E, m.5460G>A	0.731226	367		122	0.199446	6. >=95% vs <5%, P+E vs C, m.709G>A		0.0128421		0.748737		0.0122306	0.0122306		0.786173		442.194		0.0128692		0.74716
123. >=95% vs <5%, P vs E, m.7028C>T	0.849424	409		123	0.199897	97. >=95% vs <5%, P+E vs C, m.16270C>T		0.0129474		0.748737		0.0123308	0.0123308		0.786173		441.193		0.0129747		0.74716
124. >=95% vs <5%, P vs E, m.11719G>A	0.484315	246		124	0.20524	426. Variant dose, P+E vs C, m.522_523dup		0.0130526		0.748737		0.0124311	0.0124311		0.786173		442.901		0.0130802		0.74716
125. >=95% vs <5%, P vs E, m.14766C>T	0.362391	194		125	0.206742	196. >=95% vs <5%, P vs E, m.15218A>G		0.0131579		0.748737		0.0125313	0.0125313		0.786173		442.479		0.0131857		0.74716
126. >=95% vs <5%, P vs E, m.16223C>T	0.474178	242		126	0.206742	180. >=95% vs <5%, P vs E, m.456C>T		0.0132632		0.748737		0.0126316	0.0126316		0.786173		441.219		0.0132911		0.74716
127. >=95% vs <5%, P vs E, m.16519T>C	0.313911	173		127	0.209862	69. >=95% vs <5%, P+E vs C, m.15928G>A		0.0133684		0.748737		0.0127318	0.0127318		0.786173		441.695		0.0133966		0.74716
128. >=95% vs <5%, P vs E, m.3010G>A	0.448667	236		128	0.209862	68. >=95% vs <5%, P+E vs C, m.15607A>G		0.0134737		0.748737		0.0128321	0.0128321		0.786173		440.429		0.0135021		0.74716
129. >=95% vs <5%, P vs E, m.499G>A	0.0665027	17		129	0.209862	66. >=95% vs <5%, P+E vs C, m.14905G>A		0.0135789		0.748737		0.0129323	0.0129323		0.786173		439.164		0.0136076		0.74716
130. >=95% vs <5%, P vs E, m.1811A>G	0.332188	181		130	0.209862	64. >=95% vs <5%, P+E vs C, m.13368G>A		0.0136842		0.748737		0.0130326	0.0130326		0.786173		437.898		0.0137131		0.74716
131. >=95% vs <5%, P vs E, m.4646T>C	0.111579	59		131	0.209862	60. >=95% vs <5%, P+E vs C, m.8697G>A		0.0137895		0.748737		0.0131328	0.0131328		0.786173		436.632		0.0138186		0.74716
132. >=95% vs <5%, P vs E, m.5999T>C	0.111579	58		132	0.209862	58. >=95% vs <5%, P+E vs C, m.4917A>G		0.0138947		0.748737		0.0132331	0.0132331		0.786173		435.367		0.0139241		0.74716
133. >=95% vs <5%, P vs E, m.6047A>G	0.111579	57		133	0.209862	56. >=95% vs <5%, P+E vs C, m.1888G>A		0.014		0.748737		0.0133333	0.0133333		0.786173		434.101		0.0140295		0.74716
134. >=95% vs <5%, P vs E, m.11332C>T	0.111579	56		134	0.218961	326. >=95% vs <5%, P vs C, m.16519T>C		0.0141053		0.748737		0.0134336	0.0134336		0.786173		437.878		0.014135		0.74716
135. >=95% vs <5%, P vs E, m.11467A>G	0.238322	144		135	0.221498	410. >=95% vs <5%, P vs C, m.16291C>T		0.0142105		0.748737		0.0135338	0.0135338		0.786173		438.021		0.0142405		0.74716
136. >=95% vs <5%, P vs E, m.12308A>G	0.155609	94		136	0.222652	375. >=95% vs <5%, P vs C, m.16126T>C		0.0143158		0.748737		0.0136341	0.0136341		0.786173		437.385		0.014346		0.74716
137. >=95% vs <5%, P vs E, m.12372G>A	0.238322	143		137	0.226849	31. >=95% vs <5%, P+E vs C, m.12308A>G		0.0144211		0.748737		0.0137343	0.0137343		0.786173		438.465		0.0144515		0.74716
138. >=95% vs <5%, P vs E, m.13708G>A	0.848576	408		138	0.228493	61. >=95% vs <5%, P+E vs C, m.10463T>C		0.0145263		0.748737		0.0138346	0.0138346		0.786173		438.104		0.014557		0.74716
139. >=95% vs <5%, P vs E, m.14620C>T	0.111579	55		139	0.228819	357. >=95% vs <5%, P vs C, m.14798T>C		0.0146316		0.748737		0.0139348	0.0139348		0.786173		436.992		0.0146624		0.74716
140. >=95% vs <5%, P vs E, m.15693T>C	0.111579	54		140	0.230999	413. >=95% vs <5%, P vs C, m.16051A>G		0.0147368		0.748737		0.0140351	0.0140351		0.786173		436.93		0.0147679		0.74716
141. >=95% vs <5%, P vs E, m.16356T>C	0.799658	391		141	0.23695	236. >=95% vs <5%, E vs C, m.152T>C		0.0148421		0.748737		0.0141353	0.0141353		0.786173		439.028		0.0148734		0.74716
142. >=95% vs <5%, P vs E, m.522_523dup	0.416131	219		142	0.237105	7. >=95% vs <5%, P+E vs C, m.1438A>G		0.0149474		0.748737		0.0142356	0.0142356		0.786173		437.806		0.0149789		0.74716
143. >=95% vs <5%, P vs E, m.152T>C	0.447843	235		143	0.238322	137. >=95% vs <5%, P vs E, m.12372G>A		0.0150526		0.748737		0.0143358	0.0143358		0.786173		437.193		0.0150844		0.74716
144. >=95% vs <5%, P vs E, m.16311T>C	0.847881	406		144	0.238322	135. >=95% vs <5%, P vs E, m.11467A>G		0.0151579		0.748737		0.0144361	0.0144361		0.786173		435.88		0.0151899		0.74716
145. >=95% vs <5%, P vs E, m.16362T>C	0.474178	241		145	0.240146	70. >=95% vs <5%, P+E vs C, m.16126T>C		0.0152632		0.748737		0.0145363	0.0145363		0.786173		435.61		0.0152954		0.74716
146. >=95% vs <5%, P vs E, m.8818C>T	0.11895	67		146	0.240761	472. Variant dose, P vs C, m.16270C>T		0.0153684		0.748737		0.0146366	0.0146366		0.786173		434.646		0.0154008		0.74716
147. >=95% vs <5%, P vs E, m.1189T>C	0.135002	88		147	0.241172	388. >=95% vs <5%, P vs C, m.15904C>T		0.0154737		0.748737		0.0147368	0.0147368		0.786173		433.563		0.0155063		0.74716
148. >=95% vs <5%, P vs E, m.3480A>G	0.0695542	24		148	0.241172	358. >=95% vs <5%, P vs C, m.16224T>C		0.0155789		0.748737		0.0148371	0.0148371		0.786173		432.246		0.0156118		0.74716
149. >=95% vs <5%, P vs E, m.9055G>A	0.374722	199		149	0.241172	356. >=95% vs <5%, P vs C, m.14167C>T		0.0156842		0.748737		0.0149373	0.0149373		0.786173		430.928		0.0157173		0.74716
150. >=95% vs <5%, P vs E, m.9698T>C	0.187995	121		150	0.241172	355. >=95% vs <5%, P vs C, m.11299T>C		0.0157895		0.748737		0.0150376	0.0150376		0.786173		429.61		0.0158228		0.74716
151. >=95% vs <5%, P vs E, m.10398A>G	0.825158	401		151	0.241172	354. >=95% vs <5%, P vs C, m.10550A>G		0.0158947		0.748737		0.0151378	0.0151378		0.786173		428.292		0.0159283		0.74716
152. >=95% vs <5%, P vs E, m.10550A>G	0.135002	87		152	0.241172	350. >=95% vs <5%, P vs C, m.3480A>G		0.016		0.748737		0.0152381	0.0152381		0.786173		426.974		0.0160338		0.74716
153. >=95% vs <5%, P vs E, m.11299T>C	0.135002	86		153	0.241172	349. >=95% vs <5%, P vs C, m.1189T>C		0.0161053		0.748737		0.0153383	0.0153383		0.786173		425.656		0.0161392		0.74716
154. >=95% vs <5%, P vs E, m.14167C>T	0.0695542	23		154	0.250522	59. >=95% vs <5%, P+E vs C, m.5147G>A		0.0162105		0.763672		0.0154386	0.0154386		0.801855		429.633		0.0162447		0.762064
155. >=95% vs <5%, P vs E, m.14798T>C	0.254902	158		155	0.252414	396. >=95% vs <5%, P vs C, m.13617T>C		0.0163158		0.763672		0.0155388	0.0155388		0.801855		429.382		0.0163502		0.762064
156. >=95% vs <5%, P vs E, m.16224T>C	0.135002	85		156	0.252414	395. >=95% vs <5%, P vs C, m.9477G>A		0.0164211		0.763672		0.0156391	0.0156391		0.801855		428.044		0.0164557		0.762064
157. >=95% vs <5%, P vs E, m.228G>A	0.564895	284		157	0.252414	394. >=95% vs <5%, P vs C, m.3197T>C		0.0165263		0.763672		0.0157393	0.0157393		0.801855		426.707		0.0165612		0.762064
158. >=95% vs <5%, P vs E, m.1888G>A	0.187995	120		158	0.254902	155. >=95% vs <5%, P vs E, m.14798T>C		0.0166316		0.76632		0.0158396	0.0158396		0.804636		426.79		0.0166667		0.764706
159. >=95% vs <5%, P vs E, m.4216T>C	0.621809	313		159	0.25963	110. >=95% vs <5%, P+E vs C, m.15218A>G		0.0167368		0.768459		0.0159398	0.0159398		0.806882		428.164		0.0167722		0.766841
160. >=95% vs <5%, P vs E, m.4917A>G	0.187995	119		160	0.25963	96. >=95% vs <5%, P+E vs C, m.14182T>C		0.0168421		0.768459		0.0160401	0.0160401		0.806882		426.814		0.0168776		0.766841
161. >=95% vs <5%, P vs E, m.5147G>A	0.135002	84		161	0.260467	72. >=95% vs <5%, P+E vs C, m.16304T>C		0.0169474		0.768459		0.0161404	0.0161404		0.806882		425.945		0.0169831		0.766841
162. >=95% vs <5%, P vs E, m.8697G>A	0.187995	118		162	0.262253	217. >=95% vs <5%, E vs C, m.14766C>T		0.0170526		0.768952		0.0162406	0.0162406		0.8074		425.62		0.0170886		0.767333
163. >=95% vs <5%, P vs E, m.10463T>C	0.10392	52		163	0.267379	438. Variant dose, P vs E, m.204T>C		0.0171579		0.779171		0.0163409	0.0163409		0.81813		427.233		0.0171941		0.777531
164. >=95% vs <5%, P vs E, m.11251A>G	0.621809	312		164	0.272994	450. Variant dose, E vs C, m.152T>C		0.0172632		0.790684		0.0164411	0.0164411		0.830218		429.157		0.0172996		0.789019
165. >=95% vs <5%, P vs E, m.13368G>A	0.187995	117		165	0.279669	372. >=95% vs <5%, P vs C, m.15452C>A		0.0173684		0.800259		0.0165414	0.0165414		0.840271		431.746		0.0174051		0.798574
166. >=95% vs <5%, P vs E, m.14905G>A	0.187995	116		166	0.279669	367. >=95% vs <5%, P vs C, m.11251A>G		0.0174737		0.800259		0.0166416	0.0166416		0.840271		430.358		0.0175105		0.798574
167. >=95% vs <5%, P vs E, m.15452C>A	0.621809	311		167	0.283753	461. Variant dose, P vs C, m.195T>C		0.0175789		0.807083		0.0167419	0.0167419		0.847437		431.416		0.017616		0.805384
168. >=95% vs <5%, P vs E, m.15607A>G	0.187995	115		168	0.285735	463. Variant dose, P vs C, m.16519T>C		0.0176842		0.807525		0.0168421	0.0168421		0.847901		431.212		0.0177215		0.805825
169. >=95% vs <5%, P vs E, m.15928G>A	0.187995	114		169	0.287309	238. >=95% vs <5%, E vs C, m.16362T>C		0.0177895		0.807525		0.0169424	0.0169424		0.847901		430.762		0.017827		0.805825
170. >=95% vs <5%, P vs E, m.16126T>C	0.621809	310		170	0.291345	100. >=95% vs <5%, P+E vs C, m.4336T>C		0.0178947		0.814052		0.0170426	0.0170426		0.854754		431.804		0.0179325		0.812338
171. >=95% vs <5%, P vs E, m.16294C>T	0.187995	113		171	0.298764	25. >=95% vs <5%, P+E vs C, m.1811A>G		0.018		0.8299		0.0171429	0.0171429		0.871395		434.946		0.018038		0.828153
172. >=95% vs <5%, P vs E, m.16304T>C	0.132466	74		172	0.303468	434. Variant dose, P+E vs C, m.16270C>T		0.0181053		0.838065		0.0172431	0.0172431		0.879968		436.448		0.0181435		0.836301
173. >=95% vs <5%, P vs E, m.16093T>C	0.75169	372		173	0.313911	127. >=95% vs <5%, P vs E, m.16519T>C		0.0182105		0.843099		0.0173434	0.0173434		0.885254		441.634		0.0182489		0.841324
174. >=95% vs <5%, P vs E, m.489T>C	0.617615	307		174	0.316847	95. >=95% vs <5%, P+E vs C, m.13617T>C		0.0183158		0.843099		0.0174436	0.0174436		0.885254		442.068		0.0183544		0.841324
175. >=95% vs <5%, P vs E, m.16129G>A	0.564895	283		175	0.316847	94. >=95% vs <5%, P+E vs C, m.9477G>A		0.0184211		0.843099		0.0175439	0.0175439		0.885254		440.604		0.0184599		0.841324
176. >=95% vs <5%, P vs E, m.16298T>C	0.374722	198		176	0.316847	92. >=95% vs <5%, P+E vs C, m.3197T>C		0.0185263		0.843099		0.0176441	0.0176441		0.885254		439.14		0.0185654		0.841324
177. >=95% vs <5%, P vs E, m.72T>C	0.331397	180		177	0.316847	24. >=95% vs <5%, P+E vs C, m.499G>A		0.0186316		0.843099		0.0177444	0.0177444		0.885254		437.677		0.0186709		0.841324
178. >=95% vs <5%, P vs E, m.4580G>A	0.135002	83		178	0.317715	67. >=95% vs <5%, P+E vs C, m.15452C>A		0.0187368		0.843099		0.0178446	0.0178446		0.885254		436.768		0.0187764		0.841324
179. >=95% vs <5%, P vs E, m.15904C>T	0.135002	82		179	0.317715	62. >=95% vs <5%, P+E vs C, m.11251A>G		0.0188421		0.843099		0.0179449	0.0179449		0.885254		435.302		0.0188819		0.841324
180. >=95% vs <5%, P vs E, m.456C>T	0.206742	126		180	0.331397	177. >=95% vs <5%, P vs E, m.72T>C		0.0189474		0.866125		0.0180451	0.0180451		0.909431		442.714		0.0189873		0.864301
181. >=95% vs <5%, P vs E, m.15924A>G	0.564895	282		181	0.332188	130. >=95% vs <5%, P vs E, m.1811A>G		0.0190526		0.866125		0.0181454	0.0181454		0.909431		441.741		0.0190928		0.864301
182. >=95% vs <5%, P vs E, m.150C>T	0.610638	301		182	0.334083	43. >=95% vs <5%, P+E vs C, m.146T>C		0.0191579		0.866125		0.0182456	0.0182456		0.909431		441.497		0.0191983		0.864301
183. >=95% vs <5%, P vs E, m.3197T>C	0.617615	306		183	0.338859	387. >=95% vs <5%, P vs C, m.4580G>A		0.0192632		0.866125		0.0183459	0.0183459		0.909431		443.173		0.0193038		0.864301
184. >=95% vs <5%, P vs E, m.9477G>A	0.617615	305		184	0.338859	313. >=95% vs <5%, P vs C, m.1438A>G		0.0193684		0.866125		0.0184461	0.0184461		0.909431		441.661		0.0194093		0.864301
185. >=95% vs <5%, P vs E, m.13617T>C	0.617615	304		185	0.339093	33. >=95% vs <5%, P+E vs C, m.13708G>A		0.0194737		0.866125		0.0185464	0.0185464		0.909431		440.304		0.0195148		0.864301
186. >=95% vs <5%, P vs E, m.14182T>C	0.135002	81		186	0.34556	248. >=95% vs <5%, E vs C, m.14167C>T		0.0195789		0.866125		0.0186466	0.0186466		0.909431		443.127		0.0196203		0.864301
187. >=95% vs <5%, P vs E, m.16270C>T	0.617615	303		187	0.34556	242. >=95% vs <5%, E vs C, m.3480A>G		0.0196842		0.866125		0.0187469	0.0187469		0.909431		441.599		0.0197257		0.864301
188. >=95% vs <5%, P vs E, m.14793A>G	0.11895	66		188	0.346164	200. >=95% vs <5%, E vs C, m.73A>G		0.0197895		0.866125		0.0188471	0.0188471		0.909431		440.478		0.0198312		0.864301
189. >=95% vs <5%, P vs E, m.16256C>T	0.0681349	21		189	0.34645	262. >=95% vs <5%, E vs C, m.14233A>G		0.0198947		0.866125		0.0189474	0.0189474		0.909431		439.14		0.0199367		0.864301
190. >=95% vs <5%, P vs E, m.185G>A	0.898305	421		190	0.34645	260. >=95% vs <5%, E vs C, m.11812A>G		0.02		0.866125		0.0190476	0.0190476		0.909431		437.61		0.0200422		0.864301
191. >=95% vs <5%, P vs E, m.295C>T	0.555667	278		191	0.354212	305. >=95% vs <5%, E vs C, m.497C>T		0.0201053		0.880126		0.0191479	0.0191479		0.924132		441.321		0.0201477		0.878273
192. >=95% vs <5%, P vs E, m.462C>T	0.799658	390		192	0.355756	221. >=95% vs <5%, E vs C, m.3010G>A		0.0202105		0.880126		0.0192481	0.0192481		0.924132		440.827		0.0202532		0.878273
193. >=95% vs <5%, P vs E, m.12612A>G	0.848576	407		193	0.359602	428. Variant dose, P+E vs C, m.16311T>C		0.0203158		0.882846		0.0193484	0.0193484		0.926988		441.913		0.0203586		0.880987
194. >=95% vs <5%, P vs E, m.16069C>T	0.555667	277		194	0.362391	125. >=95% vs <5%, P vs E, m.14766C>T		0.0204211		0.882846		0.0194486	0.0194486		0.926988		442.277		0.0204641		0.880987
195. >=95% vs <5%, P vs E, m.522_523del	0.696058	347		195	0.364571	284. >=95% vs <5%, E vs C, m.150C>T		0.0205263		0.882846		0.0195489	0.0195489		0.926988		442.221		0.0205696		0.880987
196. >=95% vs <5%, P vs E, m.15218A>G	0.206742	125		196	0.36614	442. Variant dose, P vs E, m.520_523dup		0.0206316		0.882846		0.0196491	0.0196491		0.926988		441.738		0.0206751		0.880987
197. >=95% vs <5%, P vs E, m.16291C>T	0.917746	428		197	0.368536	87. >=95% vs <5%, P+E vs C, m.456C>T		0.0207368		0.882846		0.0197494	0.0197494		0.926988		441.83		0.0207806		0.880987
198. >=95% vs <5%, P vs E, m.16399A>G	0.799658	389		198	0.374722	176. >=95% vs <5%, P vs E, m.16298T>C		0.0208421		0.882846		0.0198496	0.0198496		0.926988		444.602		0.0208861		0.880987
199. >=95% vs <5%, P vs E, m.16051A>G	0.898305	420		199	0.374722	149. >=95% vs <5%, P vs E, m.9055G>A		0.0209474		0.882846		0.0199499	0.0199499		0.926988		443.003		0.0209916		0.880987
200. >=95% vs <5%, E vs C, m.73A>G	0.346164	188		200	0.375655	38. >=95% vs <5%, P+E vs C, m.152T>C		0.0210526		0.882846		0.0200501	0.0200501		0.926988		442.063		0.021097		0.880987
201. >=95% vs <5%, E vs C, m.194C>T	0.113138	64		201	0.377787	213. >=95% vs <5%, E vs C, m.11719G>A		0.0211579		0.882846		0.0201504	0.0201504		0.926988		441.971		0.0212025		0.880987
202. >=95% vs <5%, E vs C, m.195T>C	0.951238	444		202	0.379244	325. >=95% vs <5%, P vs C, m.16223C>T		0.0212632		0.882846		0.0202506	0.0202506		0.926988		441.398		0.021308		0.880987
203. >=95% vs <5%, E vs C, m.204T>C	0.385027	204		203	0.381749	439. Variant dose, P vs E, m.522_523dup		0.0213684		0.882846		0.0203509	0.0203509		0.926988		441.568		0.0214135		0.880987
204. >=95% vs <5%, E vs C, m.207G>A	0.635394	329		204	0.385027	203. >=95% vs <5%, E vs C, m.204T>C		0.0214737		0.882846		0.0204511	0.0204511		0.926988		442.296		0.021519		0.880987
205. >=95% vs <5%, E vs C, m.709G>A	0.812317	396		205	0.392707	113. >=95% vs <5%, P+E vs C, m.15833C>T		0.0215789		0.882846		0.0205514	0.0205514		0.926988		446.242		0.0216245		0.880987
206. >=95% vs <5%, E vs C, m.1438A>G	0.394028	212		206	0.392707	109. >=95% vs <5%, P+E vs C, m.188A>G		0.0216842		0.882846		0.0206516	0.0206516		0.926988		444.596		0.02173		0.880987
207. >=95% vs <5%, E vs C, m.2706A>G	0.792322	388		207	0.393685	231. >=95% vs <5%, E vs C, m.13708G>A		0.0217895		0.882846		0.0207519	0.0207519		0.926988		443.664		0.0218354		0.880987
208. >=95% vs <5%, E vs C, m.4769A>G	0.394028	211		208	0.393991	273. >=95% vs <5%, E vs C, m.15043G>A		0.0218947		0.882846		0.0208521	0.0208521		0.926988		442.238		0.0219409		0.880987
209. >=95% vs <5%, E vs C, m.5460G>A	0.635394	328		209	0.394028	#N/A		0.022		0.882846		0.0209524	0.0209524		0.926988		440.615		0.0220464		0.880987
210. >=95% vs <5%, E vs C, m.7028C>T	0.792322	387		210	0.394028	#N/A		0.0221053		0.882846		0.0210526	0.0210526		0.926988		438.964		0.0221519		0.880987
211. >=95% vs <5%, E vs C, m.8251G>A	0.49125	250		211	0.394028	208. >=95% vs <5%, E vs C, m.4769A>G		0.0222105		0.882846		0.0211529	0.0211529		0.926988		437.314		0.0222574		0.880987
212. >=95% vs <5%, E vs C, m.8994G>A	0.113138	63		212	0.394028	206. >=95% vs <5%, E vs C, m.1438A>G		0.0223158		0.882846		0.0212531	0.0212531		0.926988		435.664		0.0223629		0.880987
213. >=95% vs <5%, E vs C, m.11719G>A	0.377787	201		213	0.39687	41. >=95% vs <5%, P+E vs C, m.16362T>C		0.0224211		0.884779		0.0213534	0.0213534		0.929018		436.059		0.0224684		0.882916
214. >=95% vs <5%, E vs C, m.11947A>G	0.113138	62		214	0.400101	448. Variant dose, E vs C, m.16519T>C		0.0225263		0.884779		0.0214536	0.0214536		0.929018		436.74		0.0225738		0.882916
215. >=95% vs <5%, E vs C, m.12414T>C	0.113138	61		215	0.400479	309. >=95% vs <5%, P vs C, m.195T>C		0.0226316		0.884779		0.0215539	0.0215539		0.929018		435.347		0.0226793		0.882916
216. >=95% vs <5%, E vs C, m.12705C>T	0.164211	98		216	0.406741	427. Variant dose, P+E vs C, m.152T>C		0.0227368		0.894293		0.0216541	0.0216541		0.939007		438.257		0.0227848		0.89241
217. >=95% vs <5%, E vs C, m.14766C>T	0.262253	162		217	0.410433	384. >=95% vs <5%, P vs C, m.16129G>A		0.0228421		0.894293		0.0217544	0.0217544		0.939007		439.306		0.0228903		0.89241
218. >=95% vs <5%, E vs C, m.16223C>T	0.123222	70		218	0.410433	352. >=95% vs <5%, P vs C, m.9698T>C		0.0229474		0.894293		0.0218546	0.0218546		0.939007		437.609		0.0229958		0.89241
219. >=95% vs <5%, E vs C, m.16519T>C	0.964504	451		219	0.416131	142. >=95% vs <5%, P vs E, m.522_523dup		0.0230526		0.901707		0.0219549	0.0219549		0.946792		440.168		0.0231013		0.899809
220. >=95% vs <5%, E vs C, m.477T>C	0.970439	458		220	0.421272	21. >=95% vs <5%, P+E vs C, m.16519T>C		0.0231579		0.901707		0.0220551	0.0220551		0.946792		442.349		0.0232068		0.899809
221. >=95% vs <5%, E vs C, m.3010G>A	0.355756	192		221	0.421429	93. >=95% vs <5%, P+E vs C, m.7768A>G		0.0232632		0.901707		0.0221554	0.0221554		0.946792		440.741		0.0233122		0.899809
222. >=95% vs <5%, E vs C, m.499G>A	0.635394	327		222	0.421429	83. >=95% vs <5%, P+E vs C, m.93A>G		0.0233684		0.901707		0.0222556	0.0222556		0.946792		439.013		0.0234177		0.899809
223. >=95% vs <5%, E vs C, m.1811A>G	0.810956	395		223	0.431708	466. Variant dose, P vs C, m.16311T>C		0.0234737		0.903037		0.0223559	0.0223559		0.948189		445.193		0.0235232		0.901136
224. >=95% vs <5%, E vs C, m.4646T>C	0.635394	326		224	0.433001	254. >=95% vs <5%, E vs C, m.4216T>C		0.0235789		0.903037		0.0224561	0.0224561		0.948189		444.445		0.0236287		0.901136
225. >=95% vs <5%, E vs C, m.5999T>C	0.635394	325		225	0.435333	277. >=95% vs <5%, E vs C, m.4580G>A		0.0236842		0.903037		0.0225564	0.0225564		0.948189		444.509		0.0237342		0.901136
226. >=95% vs <5%, E vs C, m.6047A>G	0.635394	324		226	0.440343	468. Variant dose, P vs C, m.228G>A		0.0237895		0.903037		0.0226566	0.0226566		0.948189		446.702		0.0238397		0.901136
227. >=95% vs <5%, E vs C, m.11332C>T	0.635394	323		227	0.443423	235. >=95% vs <5%, E vs C, m.522_523dup		0.0238947		0.903037		0.0227569	0.0227569		0.948189		447.378		0.0239451		0.901136
228. >=95% vs <5%, E vs C, m.11467A>G	0.705584	349		228	0.44429	35. >=95% vs <5%, P+E vs C, m.15693T>C		0.024		0.903037		0.0228571	0.0228571		0.948189		446.276		0.0240506		0.901136
229. >=95% vs <5%, E vs C, m.12308A>G	0.922803	432		229	0.44429	34. >=95% vs <5%, P+E vs C, m.14620C>T		0.0241053		0.903037		0.0229574	0.0229574		0.948189		444.476		0.0241561		0.901136
230. >=95% vs <5%, E vs C, m.12372G>A	0.705584	348		230	0.44429	29. >=95% vs <5%, P+E vs C, m.11332C>T		0.0242105		0.903037		0.0230576	0.0230576		0.948189		442.677		0.0242616		0.901136
231. >=95% vs <5%, E vs C, m.13708G>A	0.393685	207		231	0.44429	28. >=95% vs <5%, P+E vs C, m.6047A>G		0.0243158		0.903037		0.0231579	0.0231579		0.948189		440.877		0.0243671		0.901136
232. >=95% vs <5%, E vs C, m.14620C>T	0.635394	322		232	0.44429	27. >=95% vs <5%, P+E vs C, m.5999T>C		0.0244211		0.903037		0.0232581	0.0232581		0.948189		439.078		0.0244726		0.901136
233. >=95% vs <5%, E vs C, m.15693T>C	0.635394	321		233	0.44429	26. >=95% vs <5%, P+E vs C, m.4646T>C		0.0245263		0.903037		0.0233584	0.0233584		0.948189		437.278		0.0245781		0.901136
234. >=95% vs <5%, E vs C, m.16356T>C	0.963399	450		234	0.444969	290. >=95% vs <5%, E vs C, m.16270C>T		0.0246316		0.903037		0.0234586	0.0234586		0.948189		436.012		0.0246835		0.901136
235. >=95% vs <5%, E vs C, m.522_523dup	0.443423	227		235	0.447843	143. >=95% vs <5%, P vs E, m.152T>C		0.0247368		0.903037		0.0235589	0.0235589		0.948189		436.47		0.024789		0.901136
236. >=95% vs <5%, E vs C, m.152T>C	0.23695	141		236	0.448667	128. >=95% vs <5%, P vs E, m.3010G>A		0.0248421		0.903037		0.0236591	0.0236591		0.948189		435.308		0.0248945		0.901136
237. >=95% vs <5%, E vs C, m.16311T>C	0.485136	247		237	0.45235	78. >=95% vs <5%, P+E vs C, m.15043G>A		0.0249474		0.906608		0.0237594	0.0237594		0.951939		436.41		0.025		0.9047
238. >=95% vs <5%, E vs C, m.16362T>C	0.287309	169		238	0.464231	451. Variant dose, E vs C, m.16311T>C		0.0250526		0.913023		0.0238596	0.0238596		0.958674		444.221		0.0251055		0.911101
239. >=95% vs <5%, E vs C, m.8818C>T	0.539564	271		239	0.469423	91. >=95% vs <5%, P+E vs C, m.150C>T		0.0251579		0.913023		0.0239599	0.0239599		0.958674		446.683		0.025211		0.911101
240. >=95% vs <5%, E vs C, m.146T>C	0.853627	412		240	0.47106	18. >=95% vs <5%, P+E vs C, m.14766C>T		0.0252632		0.913023		0.0240602	0.0240602		0.958674		446.176		0.0253165		0.911101
241. >=95% vs <5%, E vs C, m.1189T>C	0.606808	298		241	0.474178	145. >=95% vs <5%, P vs E, m.16362T>C		0.0253684		0.913023		0.0241604	0.0241604		0.958674		446.92		0.0254219		0.911101
242. >=95% vs <5%, E vs C, m.3480A>G	0.34556	187		242	0.474178	126. >=95% vs <5%, P vs E, m.16223C>T		0.0254737		0.913023		0.0242607	0.0242607		0.958674		445.018		0.0255274		0.911101
243. >=95% vs <5%, E vs C, m.9055G>A	0.638766	331		243	0.477092	408. >=95% vs <5%, P vs C, m.188A>G		0.0255789		0.913023		0.0243609	0.0243609		0.958674		445.585		0.0256329		0.911101
244. >=95% vs <5%, E vs C, m.9698T>C	0.486043	249		244	0.477092	382. >=95% vs <5%, P vs C, m.11914G>A		0.0256842		0.913023		0.0244612	0.0244612		0.958674		443.672		0.0257384		0.911101
245. >=95% vs <5%, E vs C, m.10398A>G	0.711411	350		245	0.477693	39. >=95% vs <5%, P+E vs C, m.16311T>C		0.0257895		0.913023		0.0245614	0.0245614		0.958674		442.268		0.0258439		0.911101
246. >=95% vs <5%, E vs C, m.10550A>G	0.606808	297		246	0.484315	124. >=95% vs <5%, P vs E, m.11719G>A		0.0258947		0.913023		0.0246617	0.0246617		0.958674		446.009		0.0259494		0.911101
247. >=95% vs <5%, E vs C, m.11299T>C	0.606808	296		247	0.485136	237. >=95% vs <5%, E vs C, m.16311T>C		0.026		0.913023		0.0247619	0.0247619		0.958674		444.778		0.0260549		0.911101
248. >=95% vs <5%, E vs C, m.14167C>T	0.34556	186		248	0.485788	52. >=95% vs <5%, P+E vs C, m.14798T>C		0.0261053		0.913023		0.0248622	0.0248622		0.958674		443.397		0.0261603		0.911101
249. >=95% vs <5%, E vs C, m.14798T>C	0.94146	441		249	0.486043	244. >=95% vs <5%, E vs C, m.9698T>C		0.0262105		0.913023		0.0249624	0.0249624		0.958674		441.671		0.0262658		0.911101
250. >=95% vs <5%, E vs C, m.16224T>C	0.606808	295		250	0.49125	211. >=95% vs <5%, E vs C, m.8251G>A		0.0263158		0.913023		0.0250627	0.0250627		0.958674		444.226		0.0263713		0.911101
251. >=95% vs <5%, E vs C, m.228G>A	0.975462	465		251	0.49522	423. Variant dose, P+E vs C, m.195T>C		0.0264211		0.913023		0.0251629	0.0251629		0.958674		445.739		0.0264768		0.911101
252. >=95% vs <5%, E vs C, m.930G>A	0.555563	276		252	0.495942	1. >=95% vs <5%, P+E vs C, m.73A>G		0.0265263		0.913023		0.0252632	0.0252632		0.958674		444.394		0.0265823		0.911101
253. >=95% vs <5%, E vs C, m.1888G>A	0.762525	382		253	0.499021	338. >=95% vs <5%, P vs C, m.13708G>A		0.0266316		0.913023		0.0253634	0.0253634		0.958674		445.128		0.0266878		0.911101
254. >=95% vs <5%, E vs C, m.4216T>C	0.433001	224		254	0.508341	118. >=95% vs <5%, P vs E, m.73A>G		0.0267368		0.913023		0.0254637	0.0254637		0.958674		451.533		0.0267932		0.911101
255. >=95% vs <5%, E vs C, m.4917A>G	0.762525	381		255	0.512692	119. >=95% vs <5%, P vs E, m.195T>C		0.0268421		0.913023		0.0255639	0.0255639		0.958674		453.512		0.0268987		0.911101
256. >=95% vs <5%, E vs C, m.5147G>A	0.880187	419		256	0.513547	447. Variant dose, E vs C, m.204T>C		0.0269474		0.913023		0.0256642	0.0256642		0.958674		452.254		0.0270042		0.911101
257. >=95% vs <5%, E vs C, m.8697G>A	0.762525	380		257	0.51611	267. >=95% vs <5%, E vs C, m.16126T>C		0.0270526		0.913023		0.0257644	0.0257644		0.958674		452.582		0.0271097		0.911101
258. >=95% vs <5%, E vs C, m.10463T>C	0.915774	426		258	0.525518	353. >=95% vs <5%, P vs C, m.10398A>G		0.0271579		0.913023		0.0258647	0.0258647		0.958674		459.449		0.0272152		0.911101
259. >=95% vs <5%, E vs C, m.11251A>G	0.609053	300		259	0.527129	80. >=95% vs <5%, P+E vs C, m.16129G>A		0.0272632		0.913023		0.0259649	0.0259649		0.958674		458.899		0.0273207		0.911101
260. >=95% vs <5%, E vs C, m.11812A>G	0.34645	190		260	0.527754	460. Variant dose, P vs C, m.73A>G		0.0273684		0.913023		0.0260652	0.0260652		0.958674		457.388		0.0274262		0.911101
261. >=95% vs <5%, E vs C, m.13368G>A	0.762525	379		261	0.528106	268. >=95% vs <5%, E vs C, m.16294C>T		0.0274737		0.913023		0.0261654	0.0261654		0.958674		455.611		0.0275316		0.911101
262. >=95% vs <5%, E vs C, m.14233A>G	0.34645	189		262	0.528734	456. Variant dose, E vs C, m.150C>T		0.0275789		0.913023		0.0262657	0.0262657		0.958674		454.096		0.0276371		0.911101
263. >=95% vs <5%, E vs C, m.14905G>A	0.762525	378		263	0.531221	48. >=95% vs <5%, P+E vs C, m.10398A>G		0.0276842		0.913023		0.0263659	0.0263659		0.958674		454.372		0.0277426		0.911101
264. >=95% vs <5%, E vs C, m.15452C>A	0.609053	299		264	0.536972	359. >=95% vs <5%, P vs C, m.228G>A		0.0277895		0.913023		0.0264662	0.0264662		0.958674		457.855		0.0278481		0.911101
265. >=95% vs <5%, E vs C, m.15607A>G	0.762525	377		265	0.537801	98. >=95% vs <5%, P+E vs C, m.14793A>G		0.0278947		0.913023		0.0265664	0.0265664		0.958674		456.513		0.0279536		0.911101
266. >=95% vs <5%, E vs C, m.15928G>A	0.762525	376		266	0.537801	42. >=95% vs <5%, P+E vs C, m.8818C>T		0.028		0.913023		0.0266667	0.0266667		0.958674		454.349		0.0280591		0.911101
267. >=95% vs <5%, E vs C, m.16126T>C	0.51611	257		267	0.539564	419. 5-95% vs (<5%+>=95%), E vs C, m.520_523dup		0.0281053		0.913023		0.0267669	0.0267669		0.958674		453.917		0.0281646		0.911101
268. >=95% vs <5%, E vs C, m.16294C>T	0.528106	261		268	0.539564	301. >=95% vs <5%, E vs C, m.188A>G		0.0282105		0.913023		0.0268672	0.0268672		0.958674		451.745		0.02827		0.911101
269. >=95% vs <5%, E vs C, m.16304T>C	0.928929	435		269	0.539564	291. >=95% vs <5%, E vs C, m.14793A>G		0.0283158		0.913023		0.0269674	0.0269674		0.958674		449.574		0.0283755		0.911101
270. >=95% vs <5%, E vs C, m.16093T>C	0.949112	443		270	0.539564	281. >=95% vs <5%, E vs C, m.1719G>A		0.0284211		0.913023		0.0270677	0.0270677		0.958674		447.402		0.028481		0.911101
271. >=95% vs <5%, E vs C, m.489T>C	0.732648	368		271	0.539564	239. >=95% vs <5%, E vs C, m.8818C>T		0.0285263		0.913023		0.0271679	0.0271679		0.958674		445.23		0.0285865		0.911101
272. >=95% vs <5%, E vs C, m.11914G>A	0.554441	275		272	0.541056	455. Variant dose, E vs C, m.520_523dup		0.0286316		0.913023		0.0272682	0.0272682		0.958674		444.499		0.028692		0.911101
273. >=95% vs <5%, E vs C, m.15043G>A	0.394028	208		273	0.54594	386. >=95% vs <5%, P vs C, m.72T>C		0.0287368		0.913023		0.0273684	0.0273684		0.958674		447.077		0.0287975		0.911101
274. >=95% vs <5%, E vs C, m.16129G>A	0.853627	411		274	0.554441	282. >=95% vs <5%, E vs C, m.15924A>G		0.0288421		0.913023		0.0274687	0.0274687		0.958674		453.363		0.028903		0.911101
275. >=95% vs <5%, E vs C, m.16298T>C	0.638766	330		275	0.554441	272. >=95% vs <5%, E vs C, m.11914G>A		0.0289474		0.913023		0.0275689	0.0275689		0.958674		451.119		0.0290084		0.911101
276. >=95% vs <5%, E vs C, m.72T>C	0.606808	294		276	0.555563	252. >=95% vs <5%, E vs C, m.930G>A		0.0290526		0.913023		0.0276692	0.0276692		0.958674		450.008		0.0291139		0.911101
277. >=95% vs <5%, E vs C, m.4580G>A	0.435333	225		277	0.555667	194. >=95% vs <5%, P vs E, m.16069C>T		0.0291579		0.913023		0.0277694	0.0277694		0.958674		447.863		0.0292194		0.911101
278. >=95% vs <5%, E vs C, m.15904C>T	0.606808	293		278	0.555667	191. >=95% vs <5%, P vs E, m.295C>T		0.0292632		0.913023		0.0278697	0.0278697		0.958674		445.612		0.0293249		0.911101
279. >=95% vs <5%, E vs C, m.199T>C	0.720869	356		279	0.558612	430. Variant dose, P+E vs C, m.228G>A		0.0293684		0.913023		0.0279699	0.0279699		0.958674		446.32		0.0294304		0.911101
280. >=95% vs <5%, E vs C, m.456C>T	0.154871	91		280	0.559836	23. >=95% vs <5%, P+E vs C, m.3010G>A		0.0294737		0.913023		0.0280702	0.0280702		0.958674		445.289		0.0295359		0.911101
281. >=95% vs <5%, E vs C, m.1719G>A	0.539564	270		281	0.56225	14. >=95% vs <5%, P+E vs C, m.11719G>A		0.0295789		0.913023		0.0281704	0.0281704		0.958674		445.46		0.0296414		0.911101
282. >=95% vs <5%, E vs C, m.15924A>G	0.554441	274		282	0.564895	181. >=95% vs <5%, P vs E, m.15924A>G		0.0296842		0.913023		0.0282707	0.0282707		0.958674		445.87		0.0297468		0.911101
283. >=95% vs <5%, E vs C, m.520_523dup	1	474		283	0.564895	175. >=95% vs <5%, P vs E, m.16129G>A		0.0297895		0.913023		0.0283709	0.0283709		0.958674		443.572		0.0298523		0.911101
284. >=95% vs <5%, E vs C, m.150C>T	0.364571	195		284	0.564895	157. >=95% vs <5%, P vs E, m.228G>A		0.0298947		0.913023		0.0284712	0.0284712		0.958674		441.273		0.0299578		0.911101
285. >=95% vs <5%, E vs C, m.3197T>C	0.606808	292		285	0.569105	3. >=95% vs <5%, P+E vs C, m.195T>C		0.03		0.913023		0.0285714	0.0285714		0.958674		443.264		0.0300633		0.911101
286. >=95% vs <5%, E vs C, m.7768A>G	0.184156	112		286	0.575871	99. >=95% vs <5%, P+E vs C, m.16256C>T		0.0301053		0.913023		0.0286717	0.0286717		0.958674		447.977		0.0301688		0.911101
287. >=95% vs <5%, E vs C, m.9477G>A	0.606808	291		287	0.581348	385. >=95% vs <5%, P vs C, m.16298T>C		0.0302105		0.913023		0.0287719	0.0287719		0.958674		451.449		0.0302743		0.911101
288. >=95% vs <5%, E vs C, m.13617T>C	0.606808	290		288	0.581348	351. >=95% vs <5%, P vs C, m.9055G>A		0.0303158		0.913023		0.0288722	0.0288722		0.958674		449.061		0.0303797		0.911101
289. >=95% vs <5%, E vs C, m.14182T>C	0.0693943	22		289	0.594904	457. Variant dose, E vs C, m.16270C>T		0.0304211		0.913023		0.0289724	0.0289724		0.958674		461.619		0.0304852		0.911101
290. >=95% vs <5%, E vs C, m.16270C>T	0.444969	234		290	0.606808	288. >=95% vs <5%, E vs C, m.13617T>C		0.0305263		0.913023		0.0290727	0.0290727		0.958674		473.051		0.0305907		0.911101
291. >=95% vs <5%, E vs C, m.14793A>G	0.539564	269		291	0.606808	287. >=95% vs <5%, E vs C, m.9477G>A		0.0306316		0.913023		0.0291729	0.0291729		0.958674		470.508		0.0306962		0.911101
292. >=95% vs <5%, E vs C, m.16256C>T	0.394028	207		292	0.606808	285. >=95% vs <5%, E vs C, m.3197T>C		0.0307368		0.913023		0.0292732	0.0292732		0.958674		467.964		0.0308017		0.911101
293. >=95% vs <5%, E vs C, m.4336T>C	0.081556	29		293	0.606808	278. >=95% vs <5%, E vs C, m.15904C>T		0.0308421		0.913023		0.0293734	0.0293734		0.958674		465.421		0.0309072		0.911101
294. >=95% vs <5%, E vs C, m.16296C>T	0.841368	404		294	0.606808	276. >=95% vs <5%, E vs C, m.72T>C		0.0309474		0.913023		0.0294737	0.0294737		0.958674		462.878		0.0310127		0.911101
295. >=95% vs <5%, E vs C, m.185G>A	0.963399	449		295	0.606808	250. >=95% vs <5%, E vs C, m.16224T>C		0.0310526		0.913023		0.0295739	0.0295739		0.958674		460.334		0.0311181		0.911101
296. >=95% vs <5%, E vs C, m.295C>T	0.692879	346		296	0.606808	247. >=95% vs <5%, E vs C, m.11299T>C		0.0311579		0.913023		0.0296742	0.0296742		0.958674		457.791		0.0312236		0.911101
297. >=95% vs <5%, E vs C, m.462C>T	0.692879	345		297	0.606808	246. >=95% vs <5%, E vs C, m.10550A>G		0.0312632		0.913023		0.0297744	0.0297744		0.958674		455.248		0.0313291		0.911101
298. >=95% vs <5%, E vs C, m.12612A>G	0.957265	446		298	0.606808	241. >=95% vs <5%, E vs C, m.1189T>C		0.0313684		0.913023		0.0298747	0.0298747		0.958674		452.705		0.0314346		0.911101
299. >=95% vs <5%, E vs C, m.16069C>T	0.692879	344		299	0.609053	264. >=95% vs <5%, E vs C, m.15452C>A		0.0314737		0.913023		0.0299749	0.0299749		0.958674		452.747		0.0315401		0.911101
300. >=95% vs <5%, E vs C, m.522_523del	0.917298	427		300	0.609053	259. >=95% vs <5%, E vs C, m.11251A>G		0.0315789		0.913023		0.0300752	0.0300752		0.958674		450.189		0.0316456		0.911101
301. >=95% vs <5%, E vs C, m.188A>G	0.539564	268		301	0.610638	182. >=95% vs <5%, P vs E, m.150C>T		0.0316842		0.913023		0.0301754	0.0301754		0.958674		449.453		0.0317511		0.911101
302. >=95% vs <5%, E vs C, m.16291C>T	0.184156	111		302	0.611677	431. Variant dose, P+E vs C, m.16093T>C		0.0317895		0.913023		0.0302757	0.0302757		0.958674		448.081		0.0318565		0.911101
303. >=95% vs <5%, E vs C, m.16399A>G	0.184156	110		303	0.617615	187. >=95% vs <5%, P vs E, m.16270C>T		0.0318947		0.913023		0.0303759	0.0303759		0.958674		452.423		0.031962		0.911101
304. >=95% vs <5%, E vs C, m.13934C>T	0.720869	355		304	0.617615	185. >=95% vs <5%, P vs E, m.13617T>C		0.032		0.913023		0.0304762	0.0304762		0.958674		449.808		0.0320675		0.911101
305. >=95% vs <5%, E vs C, m.497C>T	0.354212	191		305	0.617615	184. >=95% vs <5%, P vs E, m.9477G>A		0.0321053		0.913023		0.0305764	0.0305764		0.958674		447.193		0.032173		0.911101
306. >=95% vs <5%, E vs C, m.16051A>G	0.184156	109		306	0.617615	183. >=95% vs <5%, P vs E, m.3197T>C		0.0322105		0.913023		0.0306767	0.0306767		0.958674		444.578		0.0322785		0.911101
307. >=95% vs <5%, P vs C, m.73A>G	0.842622	405		307	0.617615	174. >=95% vs <5%, P vs E, m.489T>C		0.0323158		0.913023		0.0307769	0.0307769		0.958674		441.963		0.032384		0.911101
308. >=95% vs <5%, P vs C, m.194C>T	0.0958375	49		308	0.620381	317. >=95% vs <5%, P vs C, m.7028C>T		0.0324211		0.913023		0.0308772	0.0308772		0.958674		442.549		0.0324895		0.911101
309. >=95% vs <5%, P vs C, m.195T>C	0.400479	215		309	0.620381	314. >=95% vs <5%, P vs C, m.2706A>G		0.0325263		0.913023		0.0309774	0.0309774		0.958674		439.915		0.0325949		0.911101
310. >=95% vs <5%, P vs C, m.204T>C	0.119278	68		310	0.621809	170. >=95% vs <5%, P vs E, m.16126T>C		0.0326316		0.913023		0.0310777	0.0310777		0.958674		438.931		0.0327004		0.911101
311. >=95% vs <5%, P vs C, m.207G>A	0.0671458	19		311	0.621809	167. >=95% vs <5%, P vs E, m.15452C>A		0.0327368		0.913023		0.0311779	0.0311779		0.958674		436.287		0.0328059		0.911101
312. >=95% vs <5%, P vs C, m.709G>A	0.0170237	2		312	0.621809	164. >=95% vs <5%, P vs E, m.11251A>G		0.0328421		0.913023		0.0312782	0.0312782		0.958674		433.643		0.0329114		0.911101
313. >=95% vs <5%, P vs C, m.1438A>G	0.338859	184		313	0.621809	159. >=95% vs <5%, P vs E, m.4216T>C		0.0329474		0.913023		0.0313784	0.0313784		0.958674		430.999		0.0330169		0.911101
314. >=95% vs <5%, P vs C, m.2706A>G	0.620381	309		314	0.625572	40. >=95% vs <5%, P+E vs C, m.239T>C		0.0330526		0.913023		0.0314787	0.0314787		0.958674		432.66		0.0331224		0.911101
315. >=95% vs <5%, P vs C, m.4769A>G	0.0958375	48		315	0.626476	344. >=95% vs <5%, P vs C, m.16311T>C		0.0331579		0.913023		0.0315789	0.0315789		0.958674		431.03		0.0332278		0.911101
316. >=95% vs <5%, P vs C, m.5460G>A	0.91901	431		316	0.62881	454. Variant dose, E vs C, m.16093T>C		0.0332632		0.913023		0.0316792	0.0316792		0.958674		431.046		0.0333333		0.911101
317. >=95% vs <5%, P vs C, m.7028C>T	0.620381	308		317	0.633823	449. Variant dose, E vs C, m.522_523dup		0.0333684		0.913023		0.0317794	0.0317794		0.958674		434.216		0.0334388		0.911101
318. >=95% vs <5%, P vs C, m.8251G>A	0.171829	100		318	0.633955	117. >=95% vs <5%, P+E vs C, m.13966A>G		0.0334737		0.913023		0.0318797	0.0318797		0.958674		431.641		0.0335443		0.911101
319. >=95% vs <5%, P vs C, m.8994G>A	0.0958375	47		319	0.633955	76. >=95% vs <5%, P+E vs C, m.9545A>G		0.0335789		0.913023		0.0319799	0.0319799		0.958674		428.909		0.0336498		0.911101
320. >=95% vs <5%, P vs C, m.11719G>A	0.926195	434		320	0.633955	74. >=95% vs <5%, P+E vs C, m.249del		0.0336842		0.913023		0.0320802	0.0320802		0.958674		426.177		0.0337553		0.911101
321. >=95% vs <5%, P vs C, m.11947A>G	0.0958375	46		321	0.635394	233. >=95% vs <5%, E vs C, m.15693T>C		0.0337895		0.913023		0.0321805	0.0321805		0.958674		425.116		0.0338608		0.911101
322. >=95% vs <5%, P vs C, m.12414T>C	0.0958375	45		322	0.635394	232. >=95% vs <5%, E vs C, m.14620C>T		0.0338947		0.913023		0.0322807	0.0322807		0.958674		422.373		0.0339662		0.911101
323. >=95% vs <5%, P vs C, m.12705C>T	0.122322	69		323	0.635394	227. >=95% vs <5%, E vs C, m.11332C>T		0.034		0.913023		0.032381	0.032381		0.958674		419.631		0.0340717		0.911101
324. >=95% vs <5%, P vs C, m.14766C>T	0.926195	433		324	0.635394	226. >=95% vs <5%, E vs C, m.6047A>G		0.0341053		0.913023		0.0324812	0.0324812		0.958674		416.888		0.0341772		0.911101
325. >=95% vs <5%, P vs C, m.16223C>T	0.379244	202		325	0.635394	225. >=95% vs <5%, E vs C, m.5999T>C		0.0342105		0.913023		0.0325815	0.0325815		0.958674		414.145		0.0342827		0.911101
326. >=95% vs <5%, P vs C, m.16519T>C	0.218961	134		326	0.635394	224. >=95% vs <5%, E vs C, m.4646T>C		0.0343158		0.913023		0.0326817	0.0326817		0.958674		411.403		0.0343882		0.911101
327. >=95% vs <5%, P vs C, m.477T>C	0.93453	439		327	0.635394	222. >=95% vs <5%, E vs C, m.499G>A		0.0344211		0.913023		0.032782	0.032782		0.958674		408.66		0.0344937		0.911101
328. >=95% vs <5%, P vs C, m.3010G>A	0.95616	445		328	0.635394	209. >=95% vs <5%, E vs C, m.5460G>A		0.0345263		0.913023		0.0328822	0.0328822		0.958674		405.917		0.0345992		0.911101
329. >=95% vs <5%, P vs C, m.499G>A	0.0665955	18		329	0.635394	204. >=95% vs <5%, E vs C, m.207G>A		0.0346316		0.913023		0.0329825	0.0329825		0.958674		403.175		0.0347046		0.911101
330. >=95% vs <5%, P vs C, m.1811A>G	0.155521	93		330	0.638766	275. >=95% vs <5%, E vs C, m.16298T>C		0.0347368		0.913023		0.0330827	0.0330827		0.958674		404.171		0.0348101		0.911101
331. >=95% vs <5%, P vs C, m.4646T>C	0.133579	80		331	0.638766	243. >=95% vs <5%, E vs C, m.9055G>A		0.0348421		0.913023		0.033183	0.033183		0.958674		401.402		0.0349156		0.911101
332. >=95% vs <5%, P vs C, m.5999T>C	0.133579	79		332	0.640077	11. >=95% vs <5%, P+E vs C, m.7028C>T		0.0349474		0.913023		0.0332832	0.0332832		0.958674		400.086		0.0350211		0.911101
333. >=95% vs <5%, P vs C, m.6047A>G	0.133579	78		333	0.640077	8. >=95% vs <5%, P+E vs C, m.2706A>G		0.0350526		0.913023		0.0333835	0.0333835		0.958674		397.308		0.0351266		0.911101
334. >=95% vs <5%, P vs C, m.11332C>T	0.133579	77		334	0.65093	421. 5-95% vs (<5%+>=95%), P vs C, m.520_523dup		0.0351579		0.921942		0.0334837	0.0334837		0.96804		406.795		0.0352321		0.920002
335. >=95% vs <5%, P vs C, m.11467A>G	0.0710085	27		335	0.652149	470. Variant dose, P vs C, m.520_523dup		0.0352632		0.921942		0.033584	0.033584		0.96804		405.346		0.0353376		0.920002
336. >=95% vs <5%, P vs C, m.12308A>G	0.0710085	26		336	0.652153	378. >=95% vs <5%, P vs C, m.16093T>C		0.0353684		0.921942		0.0336842	0.0336842		0.96804		402.476		0.035443		0.920002
337. >=95% vs <5%, P vs C, m.12372G>A	0.0710085	25		337	0.667241	415. 5-95% vs (<5%+>=95%), P+E vs C, m.16093T>C		0.0354737		0.932175		0.0337845	0.0337845		0.978783		417.719		0.0355485		0.930212
338. >=95% vs <5%, P vs C, m.13708G>A	0.499021	253		338	0.667241	108. >=95% vs <5%, P+E vs C, m.16172T>C		0.0355789		0.932175		0.0338847	0.0338847		0.978783		414.714		0.035654		0.930212
339. >=95% vs <5%, P vs C, m.14620C>T	0.133579	76		339	0.667241	79. >=95% vs <5%, P+E vs C, m.15301G>A		0.0356842		0.932175		0.033985	0.033985		0.978783		411.709		0.0357595		0.930212
340. >=95% vs <5%, P vs C, m.15693T>C	0.133579	75		340	0.667241	20. >=95% vs <5%, P+E vs C, m.16234C>T		0.0357895		0.932175		0.0340852	0.0340852		0.978783		408.704		0.035865		0.930212
341. >=95% vs <5%, P vs C, m.16356T>C	0.72607	359		341	0.673814	458. Variant dose, E vs C, m.16296C>T		0.0358947		0.938597		0.0341855	0.0341855		0.985527		413.874		0.0359705		0.936621
342. >=95% vs <5%, P vs C, m.522_523dup	0.0728906	28		342	0.680036	88. >=95% vs <5%, P+E vs C, m.1719G>A		0.036		0.944494		0.0342857	0.0342857		0.991719		418.797		0.0360759		0.942506
343. >=95% vs <5%, P vs C, m.152T>C	0.759042	375		343	0.686011	445. Variant dose, E vs C, m.73A>G		0.0361053		0.945673		0.034386	0.034386		0.992957		423.582		0.0361814		0.943682
344. >=95% vs <5%, P vs C, m.16311T>C	0.626476	315		344	0.692879	299. >=95% vs <5%, E vs C, m.16069C>T		0.0362105		0.945673		0.0344862	0.0344862		0.992957		429.798		0.0362869		0.943682
345. >=95% vs <5%, P vs C, m.239T>C	0.816681	399		345	0.692879	297. >=95% vs <5%, E vs C, m.462C>T		0.0363158		0.945673		0.0345865	0.0345865		0.992957		426.542		0.0363924		0.943682
346. >=95% vs <5%, P vs C, m.16362T>C	0.743664	369		346	0.692879	296. >=95% vs <5%, E vs C, m.295C>T		0.0364211		0.945673		0.0346867	0.0346867		0.992957		423.286		0.0364979		0.943682
347. >=95% vs <5%, P vs C, m.8818C>T	0.179849	107		347	0.696058	195. >=95% vs <5%, P vs E, m.522_523del		0.0365263		0.945673		0.034787	0.034787		0.992957		424.424		0.0366034		0.943682
348. >=95% vs <5%, P vs C, m.146T>C	0.171829	99		348	0.705584	230. >=95% vs <5%, E vs C, m.12372G>A		0.0366316		0.945673		0.0348872	0.0348872		0.992957		434.759		0.0367089		0.943682
349. >=95% vs <5%, P vs C, m.1189T>C	0.241172	153		349	0.705584	228. >=95% vs <5%, E vs C, m.11467A>G		0.0367368		0.945673		0.0349875	0.0349875		0.992957		431.363		0.0368143		0.943682
350. >=95% vs <5%, P vs C, m.3480A>G	0.241172	152		350	0.711411	245. >=95% vs <5%, E vs C, m.10398A>G		0.0368421		0.945673		0.0350877	0.0350877		0.992957		436.606		0.0369198		0.943682
351. >=95% vs <5%, P vs C, m.9055G>A	0.581348	288		351	0.713421	469. Variant dose, P vs C, m.16093T>C		0.0369474		0.945673		0.035188	0.035188		0.992957		436.18		0.0370253		0.943682
352. >=95% vs <5%, P vs C, m.9698T>C	0.410433	218		352	0.716632	54. >=95% vs <5%, P+E vs C, m.228G>A		0.0370526		0.945673		0.0352882	0.0352882		0.992957		437.593		0.0371308		0.943682
353. >=95% vs <5%, P vs C, m.10398A>G	0.525518	258		353	0.719	383. >=95% vs <5%, P vs C, m.15043G>A		0.0371579		0.945673		0.0353885	0.0353885		0.992957		437.722		0.0372363		0.943682
354. >=95% vs <5%, P vs C, m.10550A>G	0.241172	151		354	0.720773	115. >=95% vs <5%, P+E vs C, m.497C>T		0.0372632		0.945673		0.0354887	0.0354887		0.992957		436.92		0.0373418		0.943682
355. >=95% vs <5%, P vs C, m.11299T>C	0.241172	150		355	0.720869	304. >=95% vs <5%, E vs C, m.13934C>T		0.0373684		0.945673		0.035589	0.035589		0.992957		433.488		0.0374473		0.943682
356. >=95% vs <5%, P vs C, m.14167C>T	0.241172	149		356	0.720869	279. >=95% vs <5%, E vs C, m.199T>C		0.0374737		0.945673		0.0356892	0.0356892		0.992957		429.906		0.0375527		0.943682
357. >=95% vs <5%, P vs C, m.14798T>C	0.228819	139		357	0.72188	407. >=95% vs <5%, P vs C, m.522_523del		0.0375789		0.945673		0.0357895	0.0357895		0.992957		427.873		0.0376582		0.943682
358. >=95% vs <5%, P vs C, m.16224T>C	0.241172	148		358	0.723774	433. Variant dose, P+E vs C, m.150C>T		0.0376842		0.945673		0.0358897	0.0358897		0.992957		427.187		0.0377637		0.943682
359. >=95% vs <5%, P vs C, m.228G>A	0.536972	264		359	0.72607	341. >=95% vs <5%, P vs C, m.16356T>C		0.0377895		0.945673		0.03599	0.03599		0.992957		427.117		0.0378692		0.943682
360. >=95% vs <5%, P vs C, m.930G>A	0.0234494	7		360	0.729945	85. >=95% vs <5%, P+E vs C, m.15904C>T		0.0378947		0.945673		0.0360902	0.0360902		0.992957		429.542		0.0379747		0.943682
361. >=95% vs <5%, P vs C, m.1888G>A	0.0891352	39		361	0.729945	53. >=95% vs <5%, P+E vs C, m.16224T>C		0.038		0.945673		0.0361905	0.0361905		0.992957		425.839		0.0380802		0.943682
362. >=95% vs <5%, P vs C, m.4216T>C	0.175488	103		362	0.729945	50. >=95% vs <5%, P+E vs C, m.11299T>C		0.0381053		0.945673		0.0362907	0.0362907		0.992957		422.136		0.0381857		0.943682
363. >=95% vs <5%, P vs C, m.4917A>G	0.0891352	38		363	0.729945	49. >=95% vs <5%, P+E vs C, m.10550A>G		0.0382105		0.945673		0.036391	0.036391		0.992957		418.434		0.0382911		0.943682
364. >=95% vs <5%, P vs C, m.5147G>A	0.0872106	31		364	0.729945	44. >=95% vs <5%, P+E vs C, m.1189T>C		0.0383158		0.945673		0.0364912	0.0364912		0.992957		414.731		0.0383966		0.943682
365. >=95% vs <5%, P vs C, m.8697G>A	0.0891352	37		365	0.729945	10. >=95% vs <5%, P+E vs C, m.5460G>A		0.0384211		0.945673		0.0365915	0.0365915		0.992957		411.028		0.0385021		0.943682
366. >=95% vs <5%, P vs C, m.10463T>C	0.0646315	16		366	0.731226	417. 5-95% vs (<5%+>=95%), P vs E, m.522_523dup		0.0385263		0.945673		0.0366917	0.0366917		0.992957		409.267		0.0386076		0.943682
367. >=95% vs <5%, P vs C, m.11251A>G	0.279669	166		367	0.731226	122. >=95% vs <5%, P vs E, m.5460G>A		0.0386316		0.945673		0.036792	0.036792		0.992957		405.546		0.0387131		0.943682
368. >=95% vs <5%, P vs C, m.11812A>G	0.0440637	10		368	0.732648	271. >=95% vs <5%, E vs C, m.489T>C		0.0387368		0.945673		0.0368922	0.0368922		0.992957		403.962		0.0388186		0.943682
369. >=95% vs <5%, P vs C, m.13368G>A	0.0891352	36		369	0.743664	346. >=95% vs <5%, P vs C, m.16362T>C		0.0388421		0.948165		0.0369925	0.0369925		0.995574		417.421		0.0389241		0.946169
370. >=95% vs <5%, P vs C, m.14233A>G	0.0440637	9		370	0.744886	73. >=95% vs <5%, P+E vs C, m.16093T>C		0.0389474		0.948165		0.0370927	0.0370927		0.995574		415.501		0.0390295		0.946169
371. >=95% vs <5%, P vs C, m.14905G>A	0.0891352	35		371	0.751308	393. >=95% vs <5%, P vs C, m.150C>T		0.0390526		0.948165		0.037193	0.037193		0.995574		422.208		0.039135		0.946169
372. >=95% vs <5%, P vs C, m.15452C>A	0.279669	165		372	0.75169	173. >=95% vs <5%, P vs E, m.16093T>C		0.0391579		0.948165		0.0372932	0.0372932		0.995574		418.831		0.0392405		0.946169
373. >=95% vs <5%, P vs C, m.15607A>G	0.0891352	34		373	0.756609	89. >=95% vs <5%, P+E vs C, m.15924A>G		0.0392632		0.948165		0.0373935	0.0373935		0.995574		423.188		0.039346		0.946169
374. >=95% vs <5%, P vs C, m.15928G>A	0.0891352	33		374	0.756693	104. >=95% vs <5%, P+E vs C, m.462C>T		0.0393684		0.948165		0.0374937	0.0374937		0.995574		419.224		0.0394515		0.946169
375. >=95% vs <5%, P vs C, m.16126T>C	0.222652	136		375	0.759042	343. >=95% vs <5%, P vs C, m.152T>C		0.0394737		0.948165		0.037594	0.037594		0.995574		419.159		0.039557		0.946169
376. >=95% vs <5%, P vs C, m.16294C>T	0.0466374	12		376	0.762525	266. >=95% vs <5%, E vs C, m.15928G>A		0.0395789		0.948165		0.0376942	0.0376942		0.995574		421.096		0.0396624		0.946169
377. >=95% vs <5%, P vs C, m.16304T>C	0.0834905	30		377	0.762525	265. >=95% vs <5%, E vs C, m.15607A>G		0.0396842		0.948165		0.0377945	0.0377945		0.995574		416.885		0.0397679		0.946169
378. >=95% vs <5%, P vs C, m.16093T>C	0.652153	336		378	0.762525	263. >=95% vs <5%, E vs C, m.14905G>A		0.0397895		0.948165		0.0378947	0.0378947		0.995574		412.674		0.0398734		0.946169
379. >=95% vs <5%, P vs C, m.249del	0.807695	394		379	0.762525	261. >=95% vs <5%, E vs C, m.13368G>A		0.0398947		0.948165		0.037995	0.037995		0.995574		408.463		0.0399789		0.946169
380. >=95% vs <5%, P vs C, m.489T>C	0.817315	400		380	0.762525	257. >=95% vs <5%, E vs C, m.8697G>A		0.04		0.948165		0.0380952	0.0380952		0.995574		404.253		0.0400844		0.946169
381. >=95% vs <5%, P vs C, m.9545A>G	0.807695	393		381	0.762525	255. >=95% vs <5%, E vs C, m.4917A>G		0.0401053		0.948165		0.0381955	0.0381955		0.995574		400.042		0.0401899		0.946169
382. >=95% vs <5%, P vs C, m.11914G>A	0.477092	244		382	0.762525	253. >=95% vs <5%, E vs C, m.1888G>A		0.0402105		0.948165		0.0382957	0.0382957		0.995574		395.831		0.0402954		0.946169
383. >=95% vs <5%, P vs C, m.15043G>A	0.719	353		383	0.771492	465. Variant dose, P vs C, m.152T>C		0.0403158		0.956811		0.038396	0.038396		1.00465		406.988		0.0404008		0.954797
384. >=95% vs <5%, P vs C, m.16129G>A	0.410433	217		384	0.777911	406. >=95% vs <5%, P vs C, m.16069C>T		0.0404211		0.957274		0.0384962	0.0384962		1.00514		414.249		0.0405063		0.955259
385. >=95% vs <5%, P vs C, m.16298T>C	0.581348	287		385	0.777911	405. >=95% vs <5%, P vs C, m.12612A>G		0.0405263		0.957274		0.0385965	0.0385965		1.00514		409.746		0.0406118		0.955259
386. >=95% vs <5%, P vs C, m.72T>C	0.54594	273		386	0.777911	403. >=95% vs <5%, P vs C, m.295C>T		0.0406316		0.957274		0.0386967	0.0386967		1.00514		405.244		0.0407173		0.955259
387. >=95% vs <5%, P vs C, m.4580G>A	0.338859	183		387	0.792322	210. >=95% vs <5%, E vs C, m.7028C>T		0.0407368		0.969982		0.038797	0.038797		1.01848		428.549		0.0408228		0.96794
388. >=95% vs <5%, P vs C, m.15904C>T	0.241172	147		388	0.792322	207. >=95% vs <5%, E vs C, m.2706A>G		0.0408421		0.969982		0.0388972	0.0388972		1.01848		423.734		0.0409283		0.96794
389. >=95% vs <5%, P vs C, m.456C>T	0.905521	423		389	0.799658	198. >=95% vs <5%, P vs E, m.16399A>G		0.0409474		0.970562		0.0389975	0.0389975		1.01909		434.257		0.0410338		0.968518
390. >=95% vs <5%, P vs C, m.1719G>A	0.93453	438		390	0.799658	192. >=95% vs <5%, P vs E, m.462C>T		0.0410526		0.970562		0.0390977	0.0390977		1.01909		429.266		0.0411392		0.968518
391. >=95% vs <5%, P vs C, m.15924A>G	0.93453	437		391	0.799658	141. >=95% vs <5%, P vs E, m.16356T>C		0.0411579		0.970562		0.039198	0.039198		1.01909		424.275		0.0412447		0.968518
392. >=95% vs <5%, P vs C, m.520_523dup	1	473		392	0.803384	36. >=95% vs <5%, P+E vs C, m.16356T>C		0.0412632		0.970562		0.0392982	0.0392982		1.01909		427.229		0.0413502		0.968518
393. >=95% vs <5%, P vs C, m.150C>T	0.751308	371		393	0.807695	381. >=95% vs <5%, P vs C, m.9545A>G		0.0413684		0.970562		0.0393985	0.0393985		1.01909		431.605		0.0414557		0.968518
394. >=95% vs <5%, P vs C, m.3197T>C	0.252414	157		394	0.807695	379. >=95% vs <5%, P vs C, m.249del		0.0414737		0.970562		0.0394987	0.0394987		1.01909		426.405		0.0415612		0.968518
395. >=95% vs <5%, P vs C, m.9477G>A	0.252414	156		395	0.810956	223. >=95% vs <5%, E vs C, m.1811A>G		0.0415789		0.970562		0.039599	0.039599		1.01909		428.472		0.0416667		0.968518
396. >=95% vs <5%, P vs C, m.13617T>C	0.252414	155		396	0.812317	205. >=95% vs <5%, E vs C, m.709G>A		0.0416842		0.970562		0.0396992	0.0396992		1.01909		426.25		0.0417722		0.968518
397. >=95% vs <5%, P vs C, m.16270C>T	0.161035	97		397	0.813033	444. Variant dose, P vs E, m.16291C>T		0.0417895		0.970562		0.0397995	0.0397995		1.01909		422.534		0.0418776		0.968518
398. >=95% vs <5%, P vs C, m.14793A>G	0.179849	106		398	0.813976	418. 5-95% vs (<5%+>=95%), E vs C, m.522_523dup		0.0418947		0.970562		0.0398997	0.0398997		1.01909		419.301		0.0419831		0.968518
399. >=95% vs <5%, P vs C, m.16256C>T	0.155477	92		399	0.816681	345. >=95% vs <5%, P vs C, m.239T>C		0.042		0.970562		0.04	0.04		1.01909		420.033		0.0420886		0.968518
400. >=95% vs <5%, P vs C, m.4336T>C	0.91901	430		400	0.817315	380. >=95% vs <5%, P vs C, m.489T>C		0.0421053		0.970562		0.0401003	0.0401003		1.01909		416.017		0.0421941		0.968518
401. >=95% vs <5%, P vs C, m.16296C>T	0.0460462	11		401	0.825158	151. >=95% vs <5%, P vs E, m.10398A>G		0.0422105		0.977431		0.0402005	0.0402005		1.0263		428.958		0.0422996		0.975373
402. >=95% vs <5%, P vs C, m.185G>A	0.91901	429		402	0.833841	105. >=95% vs <5%, P+E vs C, m.12612A>G		0.0423158		0.984089		0.0403008	0.0403008		1.03329		445.358		0.0424051		0.982017
403. >=95% vs <5%, P vs C, m.295C>T	0.777911	386		403	0.83935	474. Variant dose, P vs C, m.522_523del		0.0424211		0.984089		0.040401	0.040401		1.03329		454.405		0.0425105		0.982017
404. >=95% vs <5%, P vs C, m.462C>T	0.905521	422		404	0.841368	294. >=95% vs <5%, E vs C, m.16296C>T		0.0425263		0.984089		0.0405013	0.0405013		1.03329		453.882		0.042616		0.982017
405. >=95% vs <5%, P vs C, m.12612A>G	0.777911	385		405	0.842622	307. >=95% vs <5%, P vs C, m.73A>G		0.0426316		0.984089		0.0406015	0.0406015		1.03329		451.145		0.0427215		0.982017
406. >=95% vs <5%, P vs C, m.16069C>T	0.777911	384		406	0.847881	144. >=95% vs <5%, P vs E, m.16311T>C		0.0427368		0.984089		0.0407018	0.0407018		1.03329		460.166		0.042827		0.982017
407. >=95% vs <5%, P vs C, m.522_523del	0.72188	357		407	0.848576	193. >=95% vs <5%, P vs E, m.12612A>G		0.0428421		0.984089		0.040802	0.040802		1.03329		455.673		0.0429325		0.982017
408. >=95% vs <5%, P vs C, m.188A>G	0.477092	243		408	0.848576	138. >=95% vs <5%, P vs E, m.13708G>A		0.0429474		0.984089		0.0409023	0.0409023		1.03329		449.069		0.043038		0.982017
409. >=95% vs <5%, P vs C, m.15218A>G	0.095633	43		409	0.849424	123. >=95% vs <5%, P vs E, m.7028C>T		0.0430526		0.984089		0.0410025	0.0410025		1.03329		444.958		0.0431435		0.982017
410. >=95% vs <5%, P vs C, m.16291C>T	0.221498	135		410	0.849424	121. >=95% vs <5%, P vs E, m.2706A>G		0.0431579		0.984089		0.0411028	0.0411028		1.03329		438.316		0.0432489		0.982017
411. >=95% vs <5%, P vs C, m.16399A>G	0.095633	42		411	0.853627	274. >=95% vs <5%, E vs C, m.16129G>A		0.0432632		0.984158		0.041203	0.041203		1.03337		444.072		0.0433544		0.982086
412. >=95% vs <5%, P vs C, m.15833C>T	0.93453	436		412	0.853627	240. >=95% vs <5%, E vs C, m.146T>C		0.0433684		0.984158		0.0413033	0.0413033		1.03337		437.241		0.0434599		0.982086
413. >=95% vs <5%, P vs C, m.16051A>G	0.230999	140		413	0.862092	425. Variant dose, P+E vs C, m.16519T>C		0.0434737		0.988066		0.0414035	0.0414035		1.03747		456.825		0.0435654		0.985986
414. 5-95% vs (<5%+>=95%), P+E vs C, m.522_523dup	0.973574	463		414	0.865449	107. >=95% vs <5%, P+E vs C, m.522_523del		0.0435789		0.988066		0.0415038	0.0415038		1.03747		460.791		0.0436709		0.985986
415. 5-95% vs (<5%+>=95%), P+E vs C, m.16093T>C	0.667241	337		415	0.867134	436. Variant dose, P+E vs C, m.522_523del		0.0436842		0.988066		0.041604	0.041604		1.03747		459.11		0.0437764		0.985986
416. 5-95% vs (<5%+>=95%), P+E vs C, m.520_523dup	0.976489	466		416	0.870741	422. Variant dose, P+E vs C, m.73A>G		0.0437895		0.988066		0.0417043	0.0417043		1.03747		464.186		0.0438819		0.985986
417. 5-95% vs (<5%+>=95%), P vs E, m.522_523dup	0.731226	366		417	0.873257	453. Variant dose, E vs C, m.228G>A		0.0438947		0.988066		0.0418045	0.0418045		1.03747		465.508		0.0439873		0.985986
418. 5-95% vs (<5%+>=95%), E vs C, m.522_523dup	0.813976	398		418	0.873953	420. 5-95% vs (<5%+>=95%), P vs C, m.522_523dup		0.044		0.988066		0.0419048	0.0419048		1.03747		460.144		0.0440928		0.985986
419. 5-95% vs (<5%+>=95%), E vs C, m.520_523dup	0.539564	267		419	0.880187	256. >=95% vs <5%, E vs C, m.5147G>A		0.0441053		0.988066		0.042005	0.042005		1.03747		475		0.0441983		0.985986
420. 5-95% vs (<5%+>=95%), P vs C, m.522_523dup	0.873953	418		420	0.898305	199. >=95% vs <5%, P vs E, m.16051A>G		0.0442105		0.988066		0.0421053	0.0421053		1.03747		475		0.0443038		0.985986
421. 5-95% vs (<5%+>=95%), P vs C, m.520_523dup	0.65093	334		421	0.898305	190. >=95% vs <5%, P vs E, m.185G>A		0.0443158		0.988066		0.0422055	0.0422055		1.03747		475		0.0444093		0.985986
422. Variant dose, P+E vs C, m.73A>G	0.870741	416		422	0.905521	404. >=95% vs <5%, P vs C, m.462C>T		0.0444211		0.988066		0.0423058	0.0423058		1.03747		475		0.0445148		0.985986
423. Variant dose, P+E vs C, m.195T>C	0.49522	251		423	0.905521	389. >=95% vs <5%, P vs C, m.456C>T		0.0445263		0.988066		0.042406	0.042406		1.03747		475		0.0446203		0.985986
424. Variant dose, P+E vs C, m.204T>C	0.129745	73		424	0.905587	441. Variant dose, P vs E, m.16093T>C		0.0446316		0.988066		0.0425063	0.0425063		1.03747		475		0.0447257		0.985986
425. Variant dose, P+E vs C, m.16519T>C	0.862092	413		425	0.909701	443. Variant dose, P vs E, m.522_523del		0.0447368		0.988066		0.0426065	0.0426065		1.03747		475		0.0448312		0.985986
426. Variant dose, P+E vs C, m.522_523dup	0.20524	124		426	0.915774	258. >=95% vs <5%, E vs C, m.10463T>C		0.0448421		0.988066		0.0427068	0.0427068		1.03747		475		0.0449367		0.985986
427. Variant dose, P+E vs C, m.152T>C	0.406741	216		427	0.917298	300. >=95% vs <5%, E vs C, m.522_523del		0.0449474		0.988066		0.042807	0.042807		1.03747		475		0.0450422		0.985986
428. Variant dose, P+E vs C, m.16311T>C	0.359602	193		428	0.917746	197. >=95% vs <5%, P vs E, m.16291C>T		0.0450526		0.988066		0.0429073	0.0429073		1.03747		475		0.0451477		0.985986
429. Variant dose, P+E vs C, m.239T>C	0.393991	208		429	0.91901	402. >=95% vs <5%, P vs C, m.185G>A		0.0451579		0.988066		0.0430075	0.0430075		1.03747		475		0.0452532		0.985986
430. Variant dose, P+E vs C, m.228G>A	0.558612	279		430	0.91901	400. >=95% vs <5%, P vs C, m.4336T>C		0.0452632		0.988066		0.0431078	0.0431078		1.03747		475		0.0453586		0.985986
431. Variant dose, P+E vs C, m.16093T>C	0.611677	302		431	0.91901	316. >=95% vs <5%, P vs C, m.5460G>A		0.0453684		0.988066		0.043208	0.043208		1.03747		475		0.0454641		0.985986
432. Variant dose, P+E vs C, m.520_523dup	0.976556	469		432	0.922803	229. >=95% vs <5%, E vs C, m.12308A>G		0.0454737		0.988066		0.0433083	0.0433083		1.03747		475		0.0455696		0.985986
433. Variant dose, P+E vs C, m.150C>T	0.723774	358		433	0.926195	324. >=95% vs <5%, P vs C, m.14766C>T		0.0455789		0.988066		0.0434085	0.0434085		1.03747		475		0.0456751		0.985986
434. Variant dose, P+E vs C, m.16270C>T	0.303468	172		434	0.926195	320. >=95% vs <5%, P vs C, m.11719G>A		0.0456842		0.988066		0.0435088	0.0435088		1.03747		475		0.0457806		0.985986
435. Variant dose, P+E vs C, m.16296C>T	0.109452	53		435	0.928929	269. >=95% vs <5%, E vs C, m.16304T>C		0.0457895		0.988066		0.043609	0.043609		1.03747		475		0.0458861		0.985986
436. Variant dose, P+E vs C, m.522_523del	0.867134	415		436	0.93453	412. >=95% vs <5%, P vs C, m.15833C>T		0.0458947		0.988066		0.0437093	0.0437093		1.03747		475		0.0459916		0.985986
437. Variant dose, P+E vs C, m.16291C>T	0.0976673	50		437	0.93453	391. >=95% vs <5%, P vs C, m.15924A>G		0.046		0.988066		0.0438095	0.0438095		1.03747		475		0.046097		0.985986
438. Variant dose, P vs E, m.204T>C	0.267379	163		438	0.93453	390. >=95% vs <5%, P vs C, m.1719G>A		0.0461053		0.988066		0.0439098	0.0439098		1.03747		475		0.0462025		0.985986
439. Variant dose, P vs E, m.522_523dup	0.381749	203		439	0.93453	327. >=95% vs <5%, P vs C, m.477T>C		0.0462105		0.988066		0.04401	0.04401		1.03747		475		0.046308		0.985986
440. Variant dose, P vs E, m.16311T>C	0.959338	447		440	0.934768	467. Variant dose, P vs C, m.239T>C		0.0463158		0.988066		0.0441103	0.0441103		1.03747		475		0.0464135		0.985986
441. Variant dose, P vs E, m.16093T>C	0.905587	424		441	0.94146	249. >=95% vs <5%, E vs C, m.14798T>C		0.0464211		0.988066		0.0442105	0.0442105		1.03747		475		0.046519		0.985986
442. Variant dose, P vs E, m.520_523dup	0.36614	196		442	0.946786	459. Variant dose, E vs C, m.522_523del		0.0465263		0.988066		0.0443108	0.0443108		1.03747		475		0.0466245		0.985986
443. Variant dose, P vs E, m.522_523del	0.909701	425		443	0.949112	270. >=95% vs <5%, E vs C, m.16093T>C		0.0466316		0.988066		0.044411	0.044411		1.03747		475		0.04673		0.985986
444. Variant dose, P vs E, m.16291C>T	0.813033	397		444	0.951238	202. >=95% vs <5%, E vs C, m.195T>C		0.0467368		0.988066		0.0445113	0.0445113		1.03747		475		0.0468354		0.985986
445. Variant dose, E vs C, m.73A>G	0.686011	343		445	0.95616	328. >=95% vs <5%, P vs C, m.3010G>A		0.0468421		0.988066		0.0446115	0.0446115		1.03747		475		0.0469409		0.985986
446. Variant dose, E vs C, m.195T>C	0.997636	472		446	0.957265	298. >=95% vs <5%, E vs C, m.12612A>G		0.0469474		0.988066		0.0447118	0.0447118		1.03747		475		0.0470464		0.985986
447. Variant dose, E vs C, m.204T>C	0.513547	256		447	0.959338	440. Variant dose, P vs E, m.16311T>C		0.0470526		0.988066		0.044812	0.044812		1.03747		475		0.0471519		0.985986
448. Variant dose, E vs C, m.16519T>C	0.400101	214		448	0.961589	75. >=95% vs <5%, P+E vs C, m.489T>C		0.0471579		0.988066		0.0449123	0.0449123		1.03747		475		0.0472574		0.985986
449. Variant dose, E vs C, m.522_523dup	0.633823	317		449	0.963399	295. >=95% vs <5%, E vs C, m.185G>A		0.0472632		0.988066		0.0450125	0.0450125		1.03747		475		0.0473629		0.985986
450. Variant dose, E vs C, m.152T>C	0.272994	164		450	0.963399	234. >=95% vs <5%, E vs C, m.16356T>C		0.0473684		0.988066		0.0451128	0.0451128		1.03747		475		0.0474684		0.985986
451. Variant dose, E vs C, m.16311T>C	0.464231	238		451	0.964504	219. >=95% vs <5%, E vs C, m.16519T>C		0.0474737		0.988066		0.045213	0.045213		1.03747		475		0.0475738		0.985986
452. Variant dose, E vs C, m.239T>C	0.159477	96		452	0.966025	106. >=95% vs <5%, P+E vs C, m.16069C>T		0.0475789		0.988066		0.0453133	0.0453133		1.03747		475		0.0476793		0.985986
453. Variant dose, E vs C, m.228G>A	0.873257	417		453	0.966025	103. >=95% vs <5%, P+E vs C, m.295C>T		0.0476842		0.988066		0.0454135	0.0454135		1.03747		475		0.0477848		0.985986
454. Variant dose, E vs C, m.16093T>C	0.62881	316		454	0.966025	81. >=95% vs <5%, P+E vs C, m.16298T>C		0.0477895		0.988066		0.0455138	0.0455138		1.03747		475		0.0478903		0.985986
455. Variant dose, E vs C, m.520_523dup	0.541056	272		455	0.966025	46. >=95% vs <5%, P+E vs C, m.9055G>A		0.0478947		0.988066		0.045614	0.045614		1.03747		475		0.0479958		0.985986
456. Variant dose, E vs C, m.150C>T	0.528734	262		456	0.966341	471. Variant dose, P vs C, m.150C>T		0.048		0.988066		0.0457143	0.0457143		1.03747		475		0.0481013		0.985986
457. Variant dose, E vs C, m.16270C>T	0.594904	289		457	0.968393	47. >=95% vs <5%, P+E vs C, m.9698T>C		0.0481053		0.988066		0.0458145	0.0458145		1.03747		475		0.0482068		0.985986
458. Variant dose, E vs C, m.16296C>T	0.673814	341		458	0.970439	220. >=95% vs <5%, E vs C, m.477T>C		0.0482105		0.988066		0.0459148	0.0459148		1.03747		475		0.0483122		0.985986
459. Variant dose, E vs C, m.522_523del	0.946786	442		459	0.970896	102. >=95% vs <5%, P+E vs C, m.185G>A		0.0483158		0.988066		0.046015	0.046015		1.03747		475		0.0484177		0.985986
460. Variant dose, P vs C, m.73A>G	0.527754	260		460	0.970896	82. >=95% vs <5%, P+E vs C, m.72T>C		0.0484211		0.988066		0.0461153	0.0461153		1.03747		475		0.0485232		0.985986
461. Variant dose, P vs C, m.195T>C	0.283753	167		461	0.970896	51. >=95% vs <5%, P+E vs C, m.14167C>T		0.0485263		0.988066		0.0462155	0.0462155		1.03747		475		0.0486287		0.985986
462. Variant dose, P vs C, m.204T>C	0.0876773	32		462	0.970896	45. >=95% vs <5%, P+E vs C, m.3480A>G		0.0486316		0.988066		0.0463158	0.0463158		1.03747		475		0.0487342		0.985986
463. Variant dose, P vs C, m.16519T>C	0.285735	168		463	0.973574	414. 5-95% vs (<5%+>=95%), P+E vs C, m.522_523dup		0.0487368		0.988066		0.046416	0.046416		1.03747		475		0.0488397		0.985986
464. Variant dose, P vs C, m.522_523dup	0.113441	65		464	0.973574	84. >=95% vs <5%, P+E vs C, m.4580G>A		0.0488421		0.988066		0.0465163	0.0465163		1.03747		454.101		0.0489451		0.985986
465. Variant dose, P vs C, m.152T>C	0.771492	383		465	0.975462	251. >=95% vs <5%, E vs C, m.228G>A		0.0489474		0.988066		0.0466165	0.0466165		1.03747		448.291		0.0490506		0.985986
466. Variant dose, P vs C, m.16311T>C	0.431708	223		466	0.976489	416. 5-95% vs (<5%+>=95%), P+E vs C, m.520_523dup		0.0490526		0.988066		0.0467168	0.0467168		1.03747		425.336		0.0491561		0.985986
467. Variant dose, P vs C, m.239T>C	0.934768	440		467	0.976489	77. >=95% vs <5%, P+E vs C, m.11914G>A		0.0491579		0.988066		0.046817	0.046817		1.03747		382.802		0.0492616		0.985986
468. Variant dose, P vs C, m.228G>A	0.440343	226		468	0.976489	22. >=95% vs <5%, P+E vs C, m.477T>C		0.0492632		0.988066		0.0469173	0.0469173		1.03747		340.269		0.0493671		0.985986
469. Variant dose, P vs C, m.16093T>C	0.713421	351		469	0.976556	432. Variant dose, P+E vs C, m.520_523dup		0.0493684		0.988066		0.0470175	0.0470175		1.03747		298.583		0.0494726		0.985986
470. Variant dose, P vs C, m.520_523dup	0.652149	335		470	0.979746	114. >=95% vs <5%, P+E vs C, m.13934C>T		0.0494737		0.988066		0.0471178	0.0471178		1.03747		296.234		0.0495781		0.985986
471. Variant dose, P vs C, m.150C>T	0.966341	456		471	0.979746	86. >=95% vs <5%, P+E vs C, m.199T>C		0.0495789		0.988066		0.047218	0.047218		1.03747		246.861		0.0496835		0.985986
472. Variant dose, P vs C, m.16270C>T	0.240761	146		472	0.997636	446. Variant dose, E vs C, m.195T>C		0.0496842		1		0.0473183	0.0473183		1.05		475		0.049789		0.997895
473. Variant dose, P vs C, m.16296C>T	0.0339536	8		473	1	392. >=95% vs <5%, P vs C, m.520_523dup		0.0497895		1		0.0474185	0.0474185		1.05		#DIV/0!		0.0498945		0.997895
474. Variant dose, P vs C, m.522_523del	0.83935	403		474	1	283. >=95% vs <5%, E vs C, m.520_523dup		0.0498947		1		0.0475188	0.0475188		1.05		#DIV/0!		0.05		0.997895
475. Variant dose, P vs C, m.16291C>T	0.0992192	51		475	1	90. >=95% vs <5%, P+E vs C, m.520_523dup		0.05		1		0.047619	0.047619		1.05		#DIV/0!		0.0501055		0.997895
